# Supplementary material for: Synthesis of 1-[bis(trifluoromethyl)phosphine]-1’-oxazolinylferrocene ligands and their application in regio- and enantioselective Pd-catalyzed allylic alkylation of monosubstituted allyl substrates
Source: PubMed Central journal article supplement (PMC4077528; doi:10.3762/bjoc.10.126), 2014-05-30

## Supporting Information

for

# Synthesis of 1-[bis(trifluoromethyl)phosphine]-1'-oxazolinyl-ferrocene ligands and their application in regio- and enantioselective Pd-catalyzed allylic alkylation of monosubstituted allyl substrates

Zeng-Wei Lai<sup>1,2</sup>, Rong-Fei Yang<sup>3</sup>, Ke-Yin Ye<sup>1</sup>, Hongbin Sun<sup>\*2</sup> and Shu-Li You<sup>\*1</sup>

Address: <sup>1</sup>State Key Laboratory of Organometallic Chemistry, Shanghai Institute of Organic Chemistry, Chinese Academy of Sciences, 345 Lingling Lu, Shanghai 200032, China, <sup>2</sup>State Key Laboratory of Natural Medicines and Center of Drug Discovery, China Pharmaceutical University, 24 Tongjia Xiang, Nanjing 210009, China and <sup>3</sup>Process Development and Manufacturing Department, Pharmaron (Beijing) Co. Ltd., 6 Taihe Road, BDA, Beijing, 100176, China.

Email: Shu-Li You\* - slyou@sioc.ac.cn; Hongbin Sun\* - hbsun2000@yahoo.com\_

\* Corresponding author

## Experimental, characterization data and spectra

### Table of contents

|                                                |        |
|------------------------------------------------|--------|
| General information                            | S2     |
| Experimental details and characterization data | S3–8   |
| References                                     | S9     |
| Copies of NMR spectra                          | S10–38 |
| Copies of HPLC chromatograms                   | S39–50 |

### General information

Unless stated otherwise, all reactions were performed under a dry argon atmosphere with dry solvents under anhydrous conditions. Liquid reagents and solvents were transferred via syringe using standard Schlenk techniques. Dry diethyl ether (Et<sub>2</sub>O) was distilled over sodium–potassium alloy. Dichloromethane (DCM), dimethylformamide (DMF), acetonitrile, and 1,2-dichloroethane (DCE) were distilled over calcium hydride. All reagents were obtained from commercial sources and used without further purification. <sup>1</sup>H and <sup>13</sup>C NMR spectra were recorded on a Varian instrument (300 MHz and 75 MHz, 400 MHz and 100 MHz, respectively) and internally referenced to tetramethylsilane signal or residual protio solvent signals. <sup>19</sup>F and <sup>31</sup>P NMR spectra were recorded on an Agilent instrument (376 and 162 MHz respectively). <sup>19</sup>F NMR chemical shifts were determined relative to CFCl<sub>3</sub> as internal standard and <sup>31</sup>P NMR spectra were referenced to an external 85% H<sub>3</sub>PO<sub>4</sub> signal (0.0 ppm). Data for <sup>1</sup>H NMR are recorded as follows: chemical shift (δ, ppm), multiplicity (s = singlet, d = doublet, t = triplet, m = multiplet or unresolved, br = broad singlet, coupling constant (s) in Hz, integration). Data for <sup>13</sup>C NMR are reported in terms of chemical shift (δ, ppm).

Compounds **3** were prepared from ferrocene in three steps according to the reported procedures [1-3].

### General procedure for the synthesis of ligands

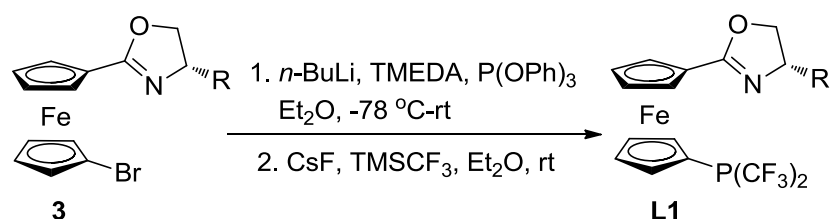

To a suspension of the corresponding 1-oxazolyl-1'-bromoferrocenes **3** (9.0 mmol) in anhydrous Et<sub>2</sub>O (55 mL) was added TMEDA (1.6 mL, 10.8 mmol) and a solution of *n*-BuLi in hexane (4.5 mL, 2.4 M, 10.8 mmol) at -78 °C. After being stirred for 2 h at that temperature, the reaction mixture was added slowly to a solution of P(OPh)<sub>3</sub> (3 mL, 11.7 mmol) in Et<sub>2</sub>O and then warmed to rt. The reaction was stirred at rt overnight until there was no change as monitored by <sup>31</sup>P NMR spectroscopy. The suspension was filtered through a pad of silica gel, washed with DCM and concentrated in vacuo. The crude product was used for the next step without purification. To a stirred solution of above crude product in Et<sub>2</sub>O (55 mL) was added CsF (19.8 mmol, 3 g) and TMSCF<sub>3</sub> (27 mmol, 3.9 mL). The reaction was stirred at rt for 4 h, concentrated in vacuo, and purified by silica gel column chromatography (petroleum ether/DCM 10:1) to give the ligand.

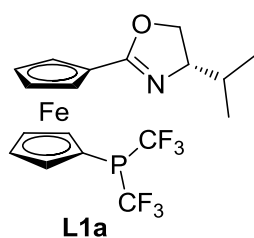

(*S*)-1-[4,5-Dihydro-4-isopropylloxazol-2-yl]-1'-[bis(trifluoromethyl)phosphino]-ferrocene (**L1a**)

Orange oil, 21% yield, IR (neat)  $\nu_{\max}$  cm<sup>-1</sup>: 2962, 1259, 1087, 1016, 796;  $[\alpha]_{\text{D}}^{20} = -29.9$  (*c* 0.45, CHCl<sub>3</sub>); <sup>1</sup>H NMR (400 MHz, CDCl<sub>3</sub>)  $\delta$  4.85 (s, 1H), 4.81 (s, 1H), 4.55 (s, 2H), 4.45 (s, 2H), 4.41 (s, 2H), 4.28 (dd, *J* = 17.6, 9.2 Hz, 1H), 4.04 (dd, *J* = 16, 7.6 Hz, 1H), 4.00-3.90 (m, 1H), 1.82 (m, 1H), 0.98 (d, *J* = 6.8 Hz, 3H), 0.90 (d, *J* = 6.8 Hz, 3H); <sup>13</sup>C NMR (100 MHz, CDCl<sub>3</sub>)  $\delta$  164.1, 75.0, 74.9, 74.8, 74.7, 74.7, 72.6, 72.4, 71.6, 71.6, 70.5, 70.4, 69.6, 32.3, 18.8, 17.9. <sup>31</sup>P NMR (162 MHz, CDCl<sub>3</sub>)  $\delta$  -1.72 (sept, *J* = 73.0 Hz); <sup>19</sup>F NMR (376 MHz, CDCl<sub>3</sub>)  $\delta$  -53.85 (dq, *J* = 73.3, 7.3 Hz, 3F), -53.94 (dq, *J* = 73.4, 7.3 Hz, 3F). HRMS (MALDI-FT) *m/z*: calcd for C<sub>18</sub>H<sub>19</sub>NOF<sub>6</sub>P<sup>54</sup>Fe [M+1]<sup>+</sup>: 464.0493, found 464.0499

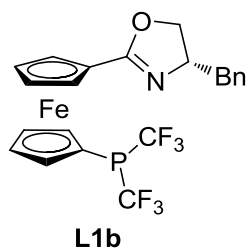

(*S*)-1-[4-benzyl-4,5-dihydrooxazol-2-yl]-1'-[bis(trifluoromethyl)phosphino]ferrocene (**L1b**)

Orange oil, 25% yield, IR (neat)  $\nu_{\max}$   $\text{cm}^{-1}$ : 2961, 2926, 1656, 1259, 1184, 1094, 1018, 797;  $[\alpha]_{\text{D}}^{16} = -10.8$  ( $c$  0.55,  $\text{CHCl}_3$ );  $^1\text{H}$  NMR (400 MHz,  $\text{CDCl}_3$ )  $\delta$  7.31-7.22 (m, 5H), 4.85 (s, 2H), 4.50-4.44 (m, 7H), 4.26 (t,  $J = 8.5$  Hz, 1H), 4.07 (t,  $J = 7.5$  Hz, 1H), 3.30-3.08 (m, 1H), 2.72 (m, 1H);  $^{13}\text{C}$  NMR (75 MHz,  $\text{CDCl}_3$ )  $\delta$  164.9, 137.6, 129.3, 128.5, 126.5, 75.0, 74.8, 74.7, 72.11, 71.7, 71.4, 70.4, 67.7, 41.5;  $^{31}\text{P}$  NMR (162 MHz,  $\text{CDCl}_3$ )  $\delta$  -1.74 (sept,  $J = 73.0$  Hz);  $^{19}\text{F}$  NMR (376 MHz,  $\text{CDCl}_3$ )  $\delta$  -53.80 (dq,  $J = 73.3, 6.4$  Hz, 3F), -53.86 (dq,  $J = 73.3, 6.4$  Hz, 3F). HRMS (MALDI-FT)  $m/z$ : calcd for  $\text{C}_{22}\text{H}_{19}\text{NOF}_6\text{P}^{54}\text{Fe}$   $[\text{M}+1]^+$ : 512.0510, found 512.0499

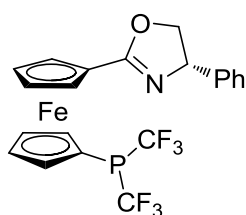

**L1c**

(*S*)-1-[4,5-dihydro-4-phenyloxazol-2-yl]-1'-[bis(trifluoromethyl)phosphino]ferrocene (**L1c**)

Orange oil, 18% yield, IR (neat)  $\nu_{\max}$   $\text{cm}^{-1}$ : 2961, 2926, 1653, 1259, 1182, 1096, 974, 954, 796;  $[\alpha]_{\text{D}}^{23} = -64.3$  ( $c$  0.6,  $\text{CHCl}_3$ );  $^1\text{H}$  NMR (400 MHz,  $\text{CDCl}_3$ )  $\delta$  7.37-7.34 (m, 2H), 7.30-7.28 (m, 3H), 5.24 (dd,  $J = 9.9, 8.1$  Hz, 1H), 4.94 (dd,  $J = 7.9, 1.2$  Hz, 2H), 4.71 (dd,  $J = 10.0, 8.4$  Hz, 1H), 4.62 (s, 2H), 4.51 (s, 2H), 4.48 (s, 2H), 4.21 (t,  $J = 8.2$  Hz, 1H);  $^{13}\text{C}$  NMR (100 MHz,  $\text{CDCl}_3$ )  $\delta$  165.7, 142.1, 128.7, 127.6, 126.5, 75.0, 74.9, 74.8, 74.7 (m), 74.6, 71.9, 71.83, 71.81, 70.6, 69.9;  $^{31}\text{P}$  NMR (162 MHz,  $\text{CDCl}_3$ )  $\delta$  -1.92 (sept,  $J = 74.5$  Hz);  $^{19}\text{F}$  NMR (376 MHz,  $\text{CDCl}_3$ )  $\delta$  -53.76 (dq,  $J = 73.3, 7.5$  Hz, 3F), -53.86 (dq,  $J = -73.3, 7.3$  Hz, 3F); HRMS (MALDI-FT)  $m/z$ : calcd for  $\text{C}_{21}\text{H}_{17}\text{NOF}_6\text{P}^{54}\text{Fe}$   $[\text{M}+1]^+$ : 498.0347, found 498.0343.

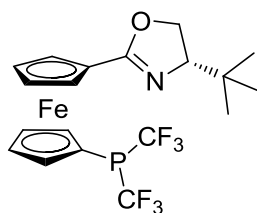

**L1d**

(*S*)-1-[4,5-Dihydro-4-*tert*-butyloxazol-2-yl]-1'-[bis(trifluoromethyl)phosphino]ferrocene (**L1d**)

Orange solid, 35% yield, mp = 56  $^{\circ}\text{C}$ , IR (neat)  $\nu_{\max}$   $\text{cm}^{-1}$ : 2961, 1258, 1086, 1012, 792;  $[\alpha]_{\text{D}}^{21} = -57.0$  ( $c$  0.25,  $\text{CHCl}_3$ ).  $^1\text{H}$  NMR (400 MHz,  $\text{CDCl}_3$ )  $\delta$  4.89 (s, 1H), 4.83 (s, 1H), 4.58 (s, 2H), 4.48 (s, 2H), 4.44 (s, 2H), 4.30-4.20 (m, 1H), 4.16 (t,  $J = 8.2$  Hz, 1H), 3.91 (dd,  $J = 9.9, 8.0$  Hz, 1H), 0.95 (s, 9H);  $^{13}\text{C}$  NMR (100 MHz,  $\text{CDCl}_3$ )  $\delta$  164.00, 76.09, 74.84 (d,  $J = 6$  Hz), 74.61 (m), 72.72, 71.52, 71.45, 70.39, 68.41,

33.45, 25.82;  $^{31}\text{P}$  NMR (162 MHz,  $\text{CDCl}_3$ )  $\delta$  -2.35 (sept,  $J = 73.3$  Hz);  $^{19}\text{F}$  NMR (376 MHz,  $\text{CDCl}_3$ )  $\delta$  -53.86 (d,  $J = 73.2$  Hz, 6F). HRMS (MALDI-FT)  $m/z$ : calcd for  $\text{C}_{19}\text{H}_{21}\text{NOF}_6\text{P}^{54}\text{Fe} [\text{M}+1]^+$ : 478.0649, found 478.0655

### General procedure for the Pd-catalyzed allylic alkylation reaction.

$\text{Pd}_2(\text{dba})_3$  (9.2 mg, 0.01 mmol) and ligand **L1d** (9.6 mg, 0.02 mmol) were dissolved in dry  $(\text{CH}_2\text{Cl})_2$  (5.0 mL) and then the reaction mixture was stirred for 30 min at rt under an atmosphere of argon. To this stirred solution was successively added allyl carbonate (0.5 mmol), dimethylmalonate (0.17 mL, 1.5 mmol), *N,O*-bis(trimethylsilyl)acetamide (BSA) (0.37 mL, 1.5 mmol), and NaOAc (1.0 mg, 0.015 mmol). The reaction was stirred at 0 °C and monitored by TLC. After completion, the reaction mixture was diluted with DCM (25 mL) and washed twice with ice-cold saturated aqueous ammonium chloride. The organic phase was dried over anhydrous  $\text{Na}_2\text{SO}_4$ , filtered and concentrated under reduced pressure. The regioselectivity of the reaction was determined by  $^1\text{H}$  NMR spectroscopy of the crude product. The residue was purified with silica gel column chromatography (petroleum ether/ethyl acetate 30:1) to provide the product. The enantiomeric purities were determined by HPLC.

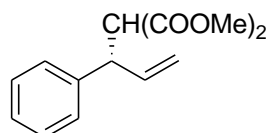

### Dimethyl 3-phenyl-1-butene-4,4-dicarboxylate (**6a**)<sup>[4]</sup>

Colorless oil, 91% yield, 88% ee [Daicel CHIRALPAK OJ-H (0.46 cm x 25 cm), hexane/2-propanol = 95/5; flow rate = 1.0 mL/min; detection wavelength = 220 nm;  $t_{\text{R}} = 19.53$  (major), 21.99 (minor) min]  $[\alpha]_{\text{D}}^{24} = -32.4$  ( $c$  1.0,  $\text{CHCl}_3$ ).  $^1\text{H}$  NMR (300 MHz,  $\text{CDCl}_3$ )  $\delta$  7.29-7.20 (m, 5H), 5.99 (ddd,  $J = 17.4, 9.0, 8.4$  Hz, 1H), 5.12 (d,  $J = 16.2$  Hz, 1H), 5.08 (d,  $J = 8.2$  Hz, 1H), 4.11 (dd,  $J = 10.4$  Hz,  $J = 8.7$  Hz, 1H), 3.86 (d,  $J = 11.1$  Hz, 1H), 3.74 (s, 3H), 3.49 (s, 3H).

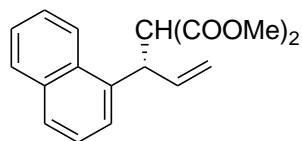

### Dimethyl 3-(1-naphthyl)-1-butene-4,4-dicarboxylate (**6b**)<sup>[5]</sup>

Colorless oil, 95% yield, 92% ee [Daicel CHIRALPAK OJ-H (0.46 cm x 25 cm), hexane/2-propanol = 90/10; flow rate = 1.0 mL/min; detection wavelength = 254 nm;  $t_{\text{R}} = 12.5$  (major), 17.4 (minor) min]  $[\alpha]_{\text{D}}^{23} = -35.9$  ( $c$  0.85,  $\text{CHCl}_3$ ).  $^1\text{H}$  NMR (400 MHz,  $\text{CDCl}_3$ )  $\delta$  8.26 (d,  $J = 8.4$  Hz, 1H), 7.85 (d,  $J = 8.0$  Hz, 1H), 7.75 (d,  $J = 7.9$  Hz, 1H), 7.56 (t,  $J = 7.1$  Hz, 1H), 7.49 (t,  $J = 7.4$  Hz, 1H), 7.47-7.37 (m, 2H), 6.09 (ddd,  $J = 17.3, 9.7, 8.0$  Hz, 1H), 5.18 (d,  $J = 17.1$  Hz, 1H), 5.11 (d,  $J = 10.2$  Hz, 1H), 5.04 (dd,  $J = 10.0, 9.2$  Hz, 1H), 4.17 (d,  $J = 10.8$  Hz, 1H), 3.79 (s, 3H), 3.39 (s, 3H).

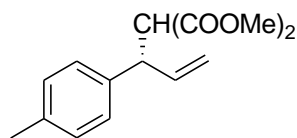

**Dimethyl 3-(4-methylphenyl)-1-butene-4,4-dicarboxylate (6c)**<sup>[6]</sup>

Colorless oil, 93% yield, 85% ee [Daicel CHIRALCEL OD-H (0.46 cm x 25 cm). hexane/2-propanol = 69/1; flow rate = 0.7 mL/min; detection wavelength = 220 nm;  $t_R$  = 9.87 (minor), 10.6 (major) min]  $[\alpha]_D^{23} = -25.5$  (*c* 1.2, CHCl<sub>3</sub>). <sup>1</sup>H NMR (400 MHz, CDCl<sub>3</sub>)  $\delta$  7.11 (s, 4H), 5.98 (ddd, *J* = 17.1, 10.2, 8.2 Hz, 1H), 5.11 (d, *J* = 17.0 Hz, 1H), 5.07 (d, *J* = 10.5 Hz, 1H), 4.08 (dd, *J* = 11.0, 8.3 Hz, 1H), 3.86 (d, *J* = 11.0 Hz, 1H), 3.74 (s, 3H), 3.51 (s, 3H), 2.31 (s, 3H).

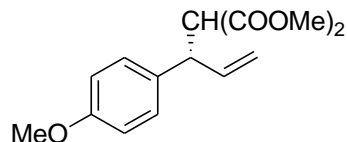**Dimethyl 3-(4-methoxyphenyl)-1-butene-4,4-dicarboxylate (6d)**<sup>[7]</sup>

Colorless oil, 96% yield, 82% ee [Daicel CHIRALCEL OD-H (0.46 cm x 25 cm). hexane/2-propanol = 90/10; flow rate = 0.5 mL/min; detection wavelength = 220 nm;  $t_R$  = 11.43 (minor), 12.76 (major) min]  $[\alpha]_D^{20} = -20.3$  (*c* 0.75, CHCl<sub>3</sub>). <sup>1</sup>H NMR (400 MHz, CDCl<sub>3</sub>)  $\delta$  7.14 (d, *J* = 8.7 Hz, 2H), 6.83 (d, *J* = 8.7 Hz, 2H), 5.97 (ddd, *J* = 17.1, 10.2, 8.1 Hz, 1H), 5.09 (d, *J* = 11.8 Hz, 1H), 5.06 (d, *J* = 8.7 Hz, 1H), 4.06 (dd, *J* = 10.9, 8.2 Hz, 1H), 3.82 (d, *J* = 11.1 Hz, 1H), 3.77 (s, 3H), 3.73 (s, 3H), 3.50 (s, 3H).

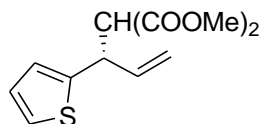**Dimethyl 3-(2-thienyl)-1-butene-4,4-dicarboxylate (6e)**<sup>[5]</sup>

Colorless oil, 94% yield, 70% ee [Daicel CHIRALPAK OJ-H (0.46 cm x 25 cm). hexane/2-propanol = 98/2; flow rate = 1.0 mL/min; detection wavelength = 220 nm;  $t_R$  = 23.15 (major), 25.5 (minor) min]  $[\alpha]_D^{23} = -30.4$  (*c* 0.5, CHCl<sub>3</sub>). <sup>1</sup>H NMR (300 MHz, CDCl<sub>3</sub>)  $\delta$  7.18 (d, *J* = 5.0 Hz, 1H), 6.92 (t, *J* = 4.2 Hz, 1H), 6.88 (d, *J* = 3.0 Hz, 1H), 6.02 (ddd, *J* = 17.4, 9.8, 8.0 Hz, 1H), 5.19 (d, *J* = 18.0 Hz, 1H), 5.13 (d, *J* = 9.6 Hz, 1H), 4.42 (dd, *J* = 9.3, 9.09 Hz, 1H), 3.84 (d, *J* = 10.2 Hz, 1H), 3.73 (s, 3H), 3.61 (s, 3H).

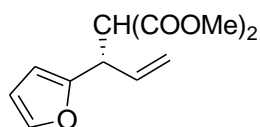**Dimethyl 3-(2-furanyl)-1-butene-4,4-dicarboxylate (6f)**<sup>[8]</sup>

Colorless oil, 90% yield, 65% ee [Daicel CHIRALPAK OJ-H (0.46 cm x 25 cm). hexane/2-propanol = 95/5; flow rate = 0.6 mL/min; detection wavelength = 220 nm;  $t_R$  = 22.73 (major), 24.36 (minor) min]  $[\alpha]_D^{23} = -9.4$  (*c* 0.3, CHCl<sub>3</sub>). <sup>1</sup>H NMR (400 MHz, CDCl<sub>3</sub>)  $\delta$  7.28 (d, *J* = 1.8 Hz, 1H), 6.23 (dd, *J* = 3.2, 1.9 Hz, 1H), 6.06 (d, *J* = 3.3 Hz, 1H), 5.92 (ddd, *J* = 17.1, 10.2, 8.5 Hz, 1H), 5.14 (d, *J* = 17.1 Hz, 1H), 5.11 (d, *J* = 9.6 Hz, 1H), 4.17 (t, *J* = 9.3 Hz, 1H), 3.83 (d, *J* = 10.0 Hz, 1H), 3.70 (s, 1H), 3.68 (s, 3H), 3.60 (s, 3H).

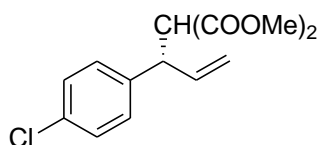

**Dimethyl 3-(4-chlorophenyl)-1-butene-4,4-dicarboxylate (6g)**<sup>[6]</sup>

Colorless oil, 91% yield, 83% ee [Daicel CHIRALCEL OD-H (0.46 cm x 25 cm). hexane/2-propanol = 69/1; flow rate = 0.7 mL/min; detection wavelength = 220 nm;  $t_R$  = 7.15 (minor), 7.75 (major) min]  $[\alpha]_D^{23} = -27.6$  (*c* 1.0, CHCl<sub>3</sub>). <sup>1</sup>H NMR (400 MHz, CDCl<sub>3</sub>)  $\delta$  7.28 (d, *J* = 8.2 Hz, 2H), 7.17 (d, *J* = 8.6 Hz, 2H), 5.95 (ddd, *J* = 18.3, 9.8, 8.0 Hz, 1H), 5.11 (d, *J* = 16.8 Hz, 1H), 5.10 (d, *J* = 10.0 Hz, 1H), 4.10 (dd, *J* = 10.8, 8.2 Hz, 1H), 3.82 (d, *J* = 11.0 Hz, 1H), 3.74 (s, 3H), 3.52 (s, 3H).

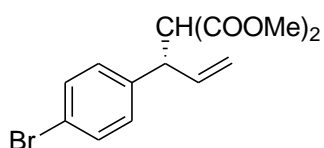

**Dimethyl 3-(4-bromophenyl)-1-butene-4,4-dicarboxylate (6h)**<sup>[8]</sup>

Colorless oil, 90% yield, 83% ee [Daicel CHIRALCEL OD-H (0.46 cm x 25 cm). hexane/2-propanol = 69/1; flow rate = 0.7 mL/min; detection wavelength = 220 nm;  $t_R$  = 11.53 (minor), 12.27 (major) min]  $[\alpha]_D^{23} = -29.2$  (*c* 1.1, CHCl<sub>3</sub>). <sup>1</sup>H NMR (400 MHz, CDCl<sub>3</sub>)  $\delta$  7.42 (d, *J* = 8.4 Hz, 2H), 7.10 (d, *J* = 8.4 Hz, 2H), 5.94 (ddd, *J* = 17.0, 10.4, 8.1 Hz, 1H), 5.08 (d, *J* = 16.8 Hz, 1H), 5.07 (d, *J* = 10.4 Hz, 1H), 4.07 (dd, *J* = 10.9, 8.2 Hz, 1H), 3.82 (d, *J* = 11.0 Hz, 1H), 3.74 (s, 3H), 3.52 (s, 3H).

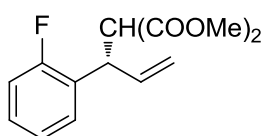

**Dimethyl 3-(2-fluorophenyl)-1-butene-4,4-dicarboxylate (6i)**<sup>[9]</sup>

Colorless oil, 90% yield, 81% ee [Daicel CHIRALCEL OD-H (0.46 cm x 25 cm). hexane/2-propanol = 95/5; flow rate = 0.6 mL/min; detection wavelength = 220 nm;  $t_R$  = 9.03 (minor), 9.77 (major) min]  $[\alpha]_D^{23} = -33.4$  (*c* 1.2, CHCl<sub>3</sub>). <sup>1</sup>H NMR (400 MHz, CDCl<sub>3</sub>)  $\delta$  7.20-7.12 (m, 2H), 7.02 (t, *J* = 7.5 Hz, 1H), 6.99-6.93 (m, 1H), 5.98 (ddd, *J* = 17.1, 9.9, 8.6 Hz, 1H), 5.10 (d, *J* = 17.0 Hz, 1H), 5.05 (d, *J* = 10.2 Hz, 1H), 4.33-4.22 (m, 1H), 3.97 (d, *J* = 11.1 Hz, 1H), 3.69 (s, 1H), 3.46 (s, 3H).

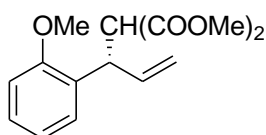

**Dimethyl 3-(2-methoxyphenyl)-1-butene-4,4-dicarboxylate (6j)**<sup>[9]</sup>

Colorless oil, 95% yield, 92% ee [Daicel CHIRALCEL OD-H (0.46 cm x 25 cm). hexane/2-propanol = 95/5; flow rate = 0.6 mL/min; detection wavelength = 220 nm;  $t_R$  = 10.32 (minor), 11.9 (major) min]  $[\alpha]_D^{23} = -35.1$  (*c* 1.0, CHCl<sub>3</sub>). <sup>1</sup>H NMR (400 MHz, CDCl<sub>3</sub>)  $\delta$  7.18-7.08 (m, 2H), 6.82 (m, 2H), 6.16-5.99 (m, 1H), 5.07 (d, *J* = 17.1 Hz, 1H), 4.99 (d, *J* = 10.1 Hz, 1H), 4.34-4.24 (m, 1H), 4.14 (d, *J* = 10.7 Hz, 1H), 3.80 (s, 3H), 3.67 (s, 3H), 3.44 (s, 3H).

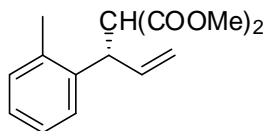

**Dimethyl 3-(2-methylphenyl)-1-butene-4,4-dicarboxylate (6k)**<sup>[10]</sup>

Colorless oil, 91% yield, 94% ee [Daicel CHIRALCEL OD-H (0.46 cm x 25 cm). hexane/2-propanol = 99/1; flow rate = 1.0 mL/min; detection wavelength = 220 nm;  $t_R$  = 7.7 (minor), 8.7 (major) min]  $[\alpha]_D^{23} = -67.9$  ( $c$  1.0,  $\text{CHCl}_3$ ).  $^1\text{H NMR}$  (400 MHz,  $\text{CDCl}_3$ )  $\delta$  7.16-7.07 (m, 4H), 5.83 (ddd,  $J = 8.0, 9.2, 18.0$  Hz, 1H), 5.04 (d,  $J = 16.8$  Hz, 1H), 5.02 (d,  $J = 10.4$  Hz, 1H), 4.37 (dd,  $J = 11.4, 8.1$  Hz, 1H), 3.95 (d,  $J = 11.4$  Hz, 1H), 3.74 (s, 3H), 3.46 (s, 3H), 2.40 (s, 3H).

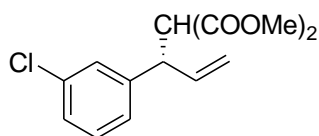

**Dimethyl 3-(3-chlorophenyl)-1-butene-4,4-dicarboxylate (6l)**<sup>[8]</sup>

Colorless oil, 90% yield, 88% ee [Phenomenex CHIRALCEL PA-2 (0.46 cm x 25 cm). hexane/2-propanol = 95/5; flow rate = 1.0 mL/min; detection wavelength = 220 nm;  $t_R$  = 23.6 (major), 36.3 (minor) min]  $[\alpha]_D^{23} = -26.1$  ( $c$  1.2,  $\text{CHCl}_3$ ).  $^1\text{H NMR}$  (400 MHz,  $\text{CDCl}_3$ )  $\delta$  7.19-7.12 (m, 3H), 7.06 (d,  $J = 7.0$  Hz, 1H), 5.97-5.81 (m, 1H), 5.08 (d,  $J = 13.6$  Hz, 1H), 5.06 (d,  $J = 10.4$  Hz, 1H), 4.03 (dd,  $J = 10.8, 8.3$  Hz, 1H), 3.78 (d,  $J = 11.0$  Hz, 1H), 3.69 (s, 3H), 3.48 (s, 3H).

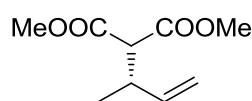

**Dimethyl 3-methyl-1-butene-4,4-dicarboxylate (6m)**<sup>[11]</sup>

Colorless oil, 96% yield,  $[\alpha]_D^{24} = -2.25$  ( $c$  1.0,  $\text{CHCl}_3$ );  $^1\text{H NMR}$  (400 MHz,  $\text{CDCl}_3$ )  $\delta$  5.67 (ddd,  $J = 17.3, 10.2, 8.1$  Hz, 1H), 5.00 (d,  $J = 17.1$  Hz, 1H), 4.92 (d,  $J = 10.3$  Hz, 1H), 3.64 (s, 3H), 3.61 (s, 3H), 3.23 (d,  $J = 9.0$  Hz, 1H), 2.88-2.82 (m, 1H), 1.00 (d,  $J = 6.8$  Hz, 3H).



## References

1. Dong, T.-Y.; Lai, L.-L. *J. Organomet. Chem.* **1996**, *509*, 131.
2. Chesney, A.; Bryce, M. R.; Chubb, R. W. J.; Batsanov, A.; Howard, J. *Synthesis* **1998**, 413.
3. Park, J.; Quan, Z.; Lee, S.; Ahn, K. H.; Cho, C.-W. *J. Organomet. Chem.* **1999**, *584*, 140.
4. Lloyd-Jones, G. C.; Pfaltz, A. *Angew. Chem., Int. Ed.* **1995**, *34*, 462.
5. Trost, B. M.; Hachiya, I. *J. Am. Chem. Soc.* **1998**, *120*, 1104.
6. Hayashi, T.; Okada, A.; Suzuka, T.; Kawatsura, M. *Org. Lett.* **2003**, *5*, 1713.
7. Kinoshita, N.; Marx, K. H.; Tanaka, K.; Tsubaki, K.; Kawabata, T.; Yoshikai, N.; Nakamura, E.; Fuji, K. *J. Org. Chem.* **2004**, *69*, 7960.
8. Hu, Z.; Li, Y.; Liu, K.; Shen, Q. *J. Org. Chem.* **2012**, *77*, 7957.
9. Nemoto, T.; Sakamoto, T.; Fukuyama, T.; Hamada, Y. *Tetrahedron Lett.* **2007**, *48*, 4977.
10. Liu, W.-B.; Zheng, C.; Zhuo, C.-X.; Dai, L.-X.; You, S.-L. *J. Am. Chem. Soc.* **2012**, *134*, 4812.
11. Evans, P. A.; Nelson, J. D. *J. Am. Chem. Soc.* **1998**, *120*, 5581

4.8481  
4.8454  
4.8154  
4.8128  
4.5511  
4.5496  
— 4.4130  
— 4.2599  
4.0600  
4.0409  
4.0220  
4.0200  
3.9870  
3.9717  
3.9672  
3.9479  
3.9307

1.8405  
1.8238  
1.8068  
1.7902

0.9903  
0.9734  
0.9116  
0.8947

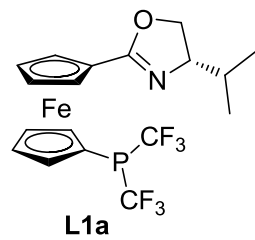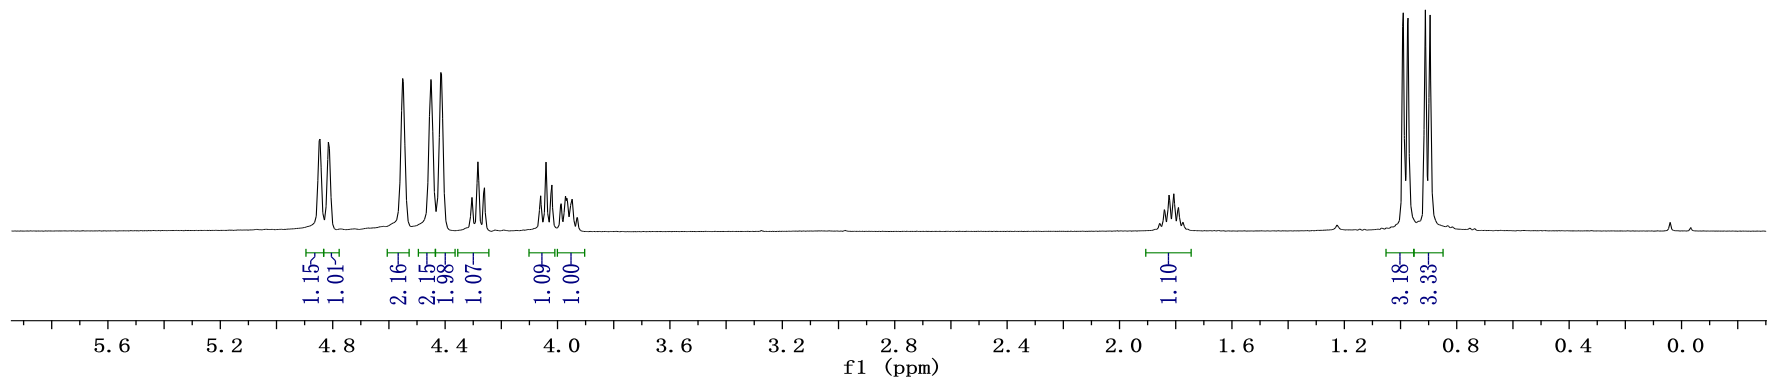

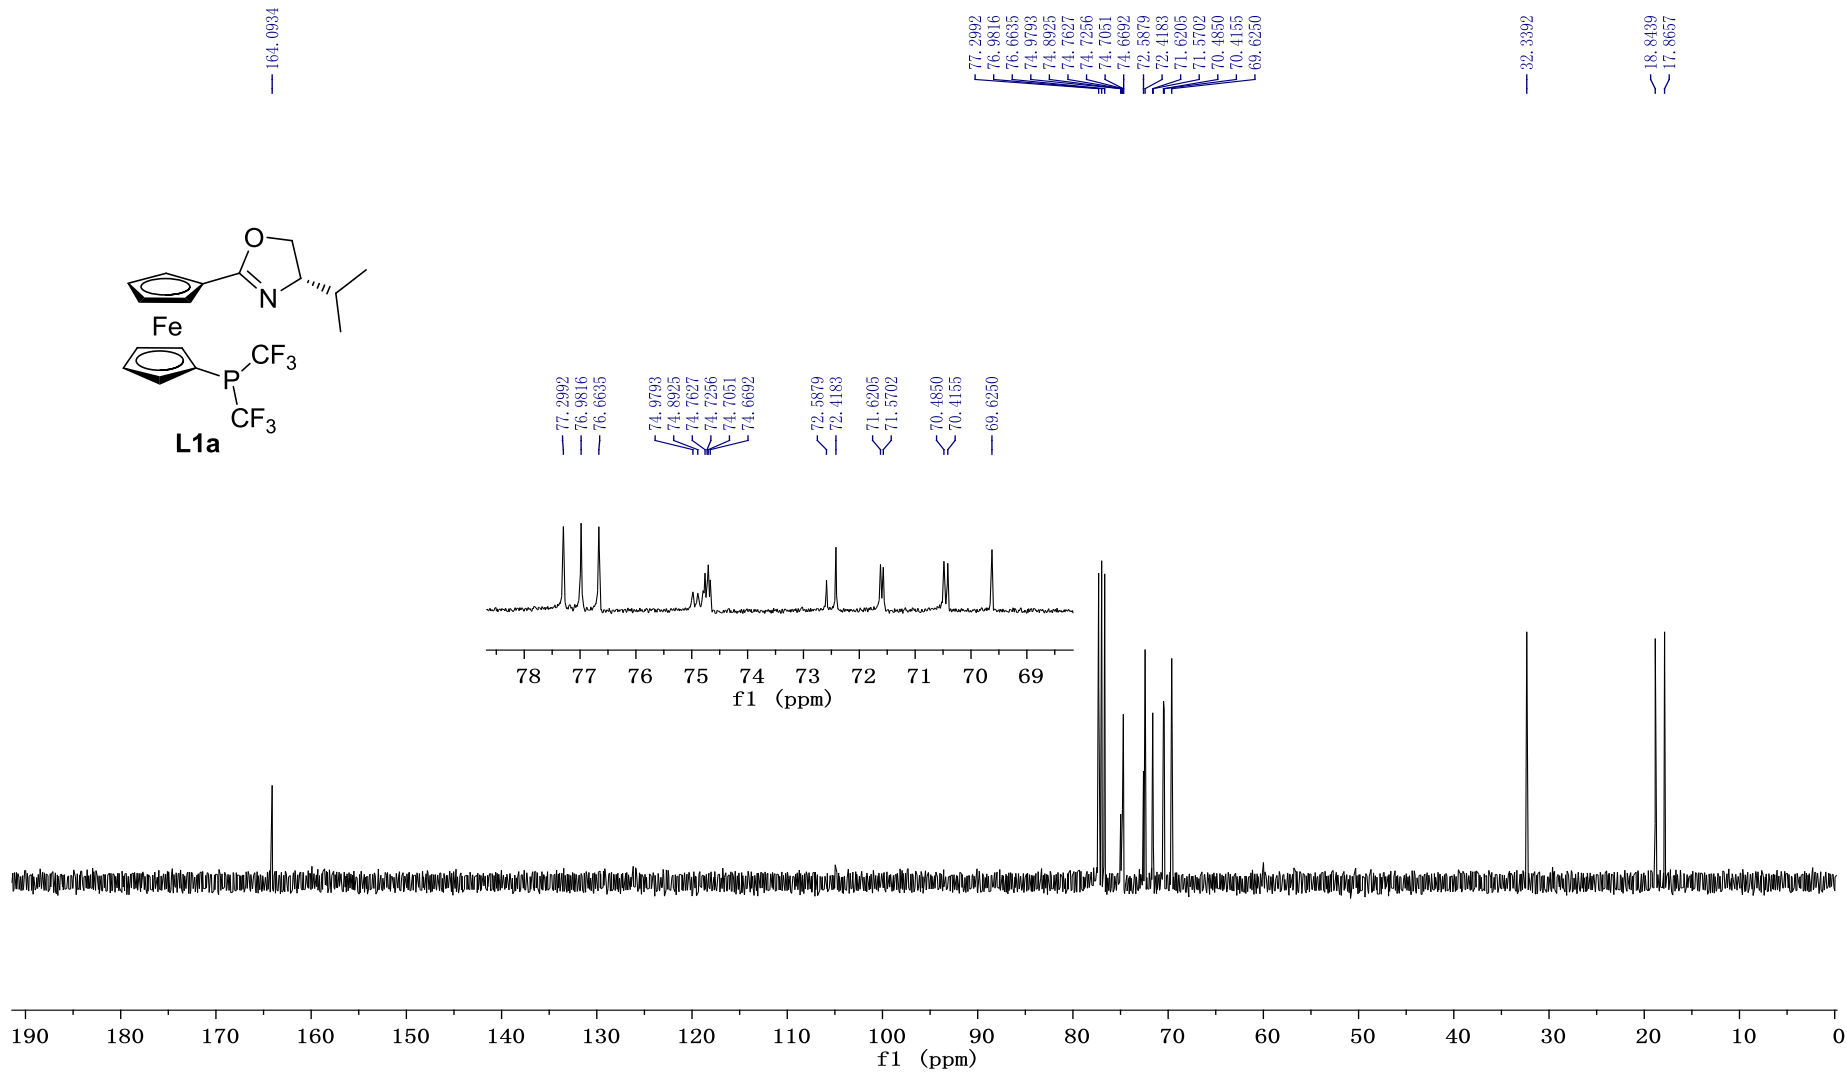

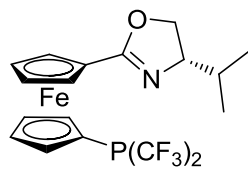

L1a,  $^{31}P$  NMR

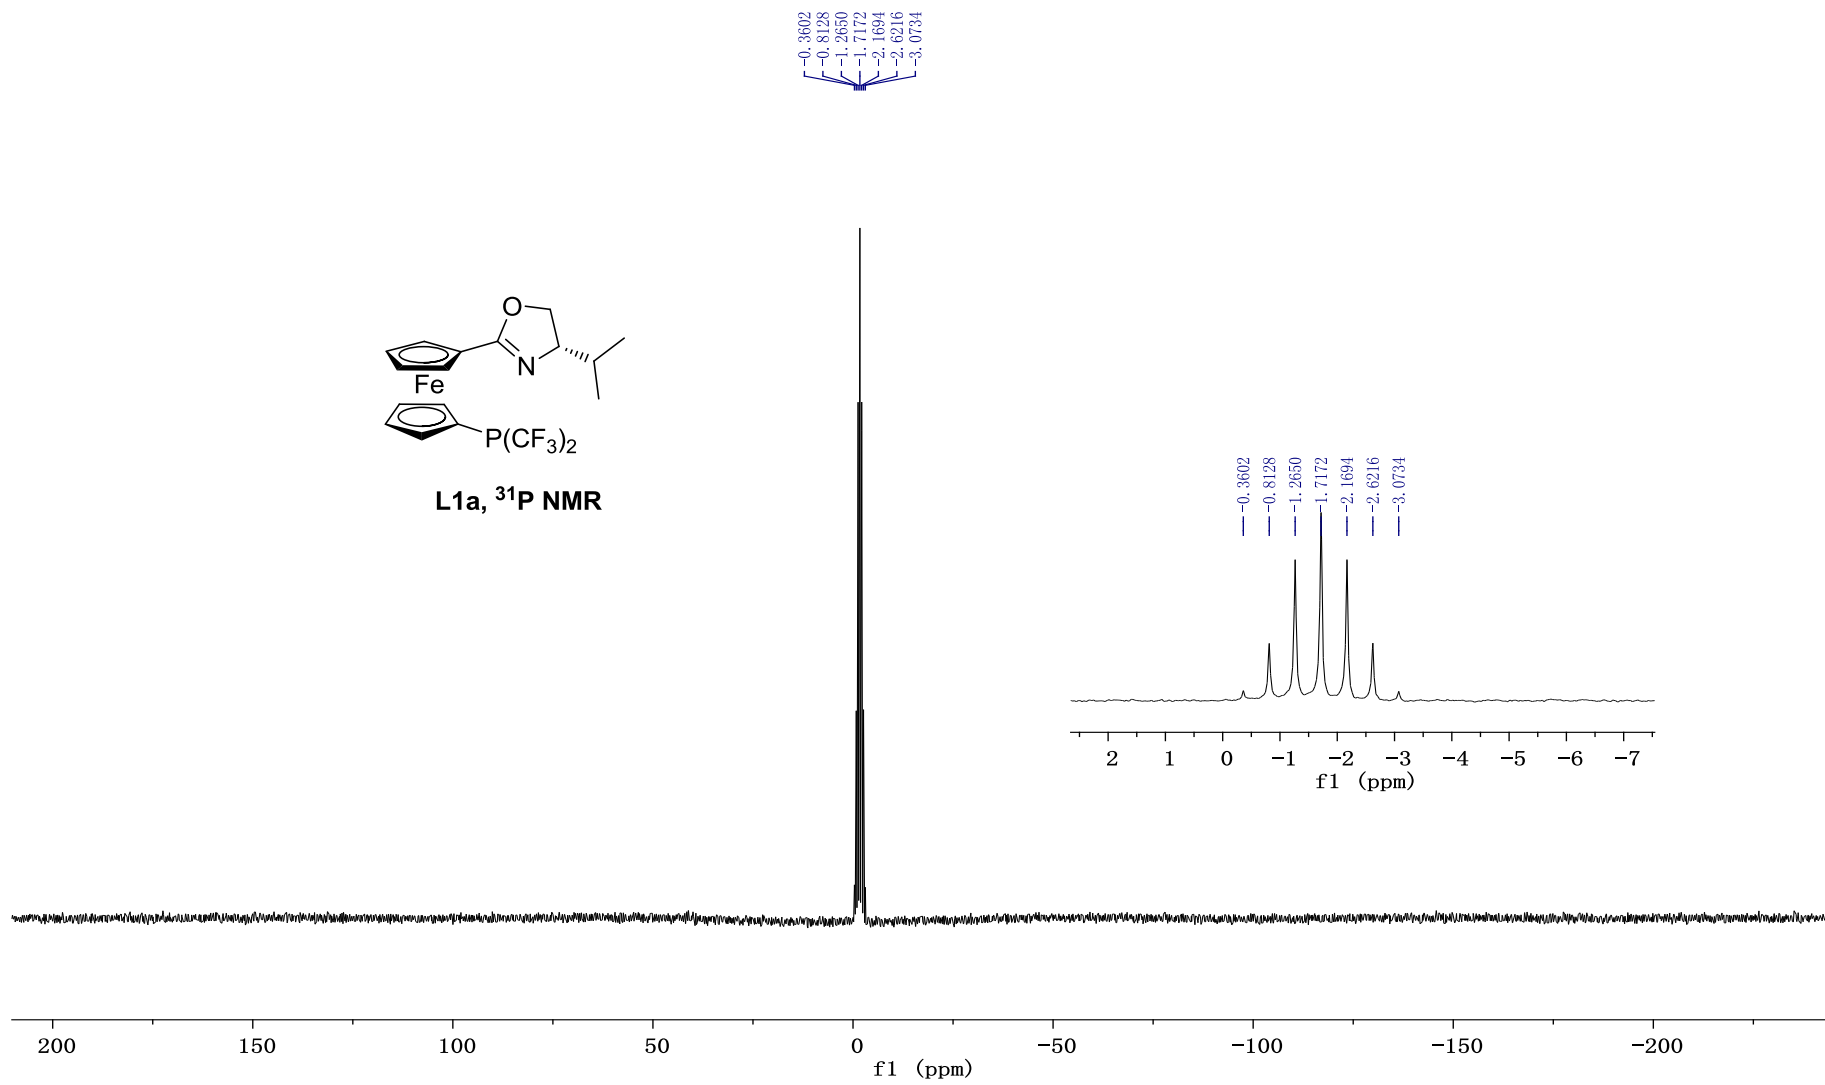

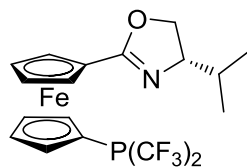

L1a, <sup>19</sup>F NMR

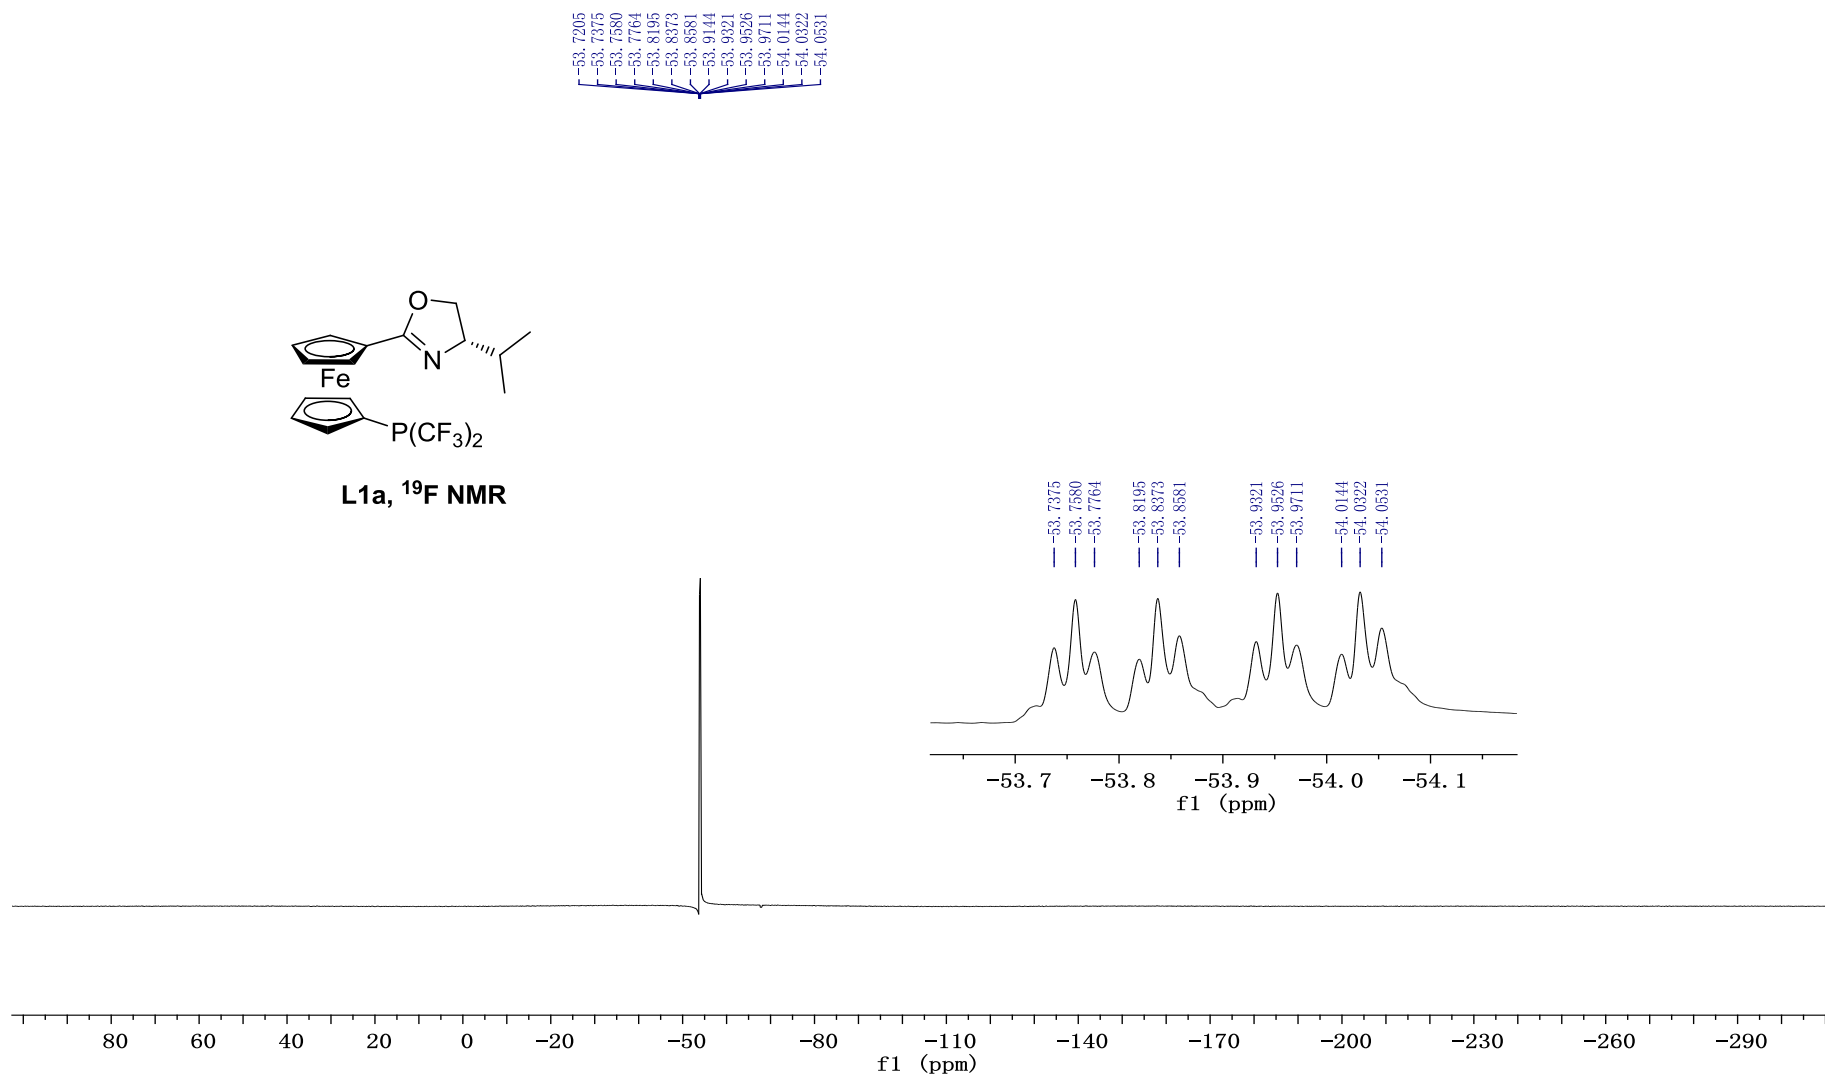

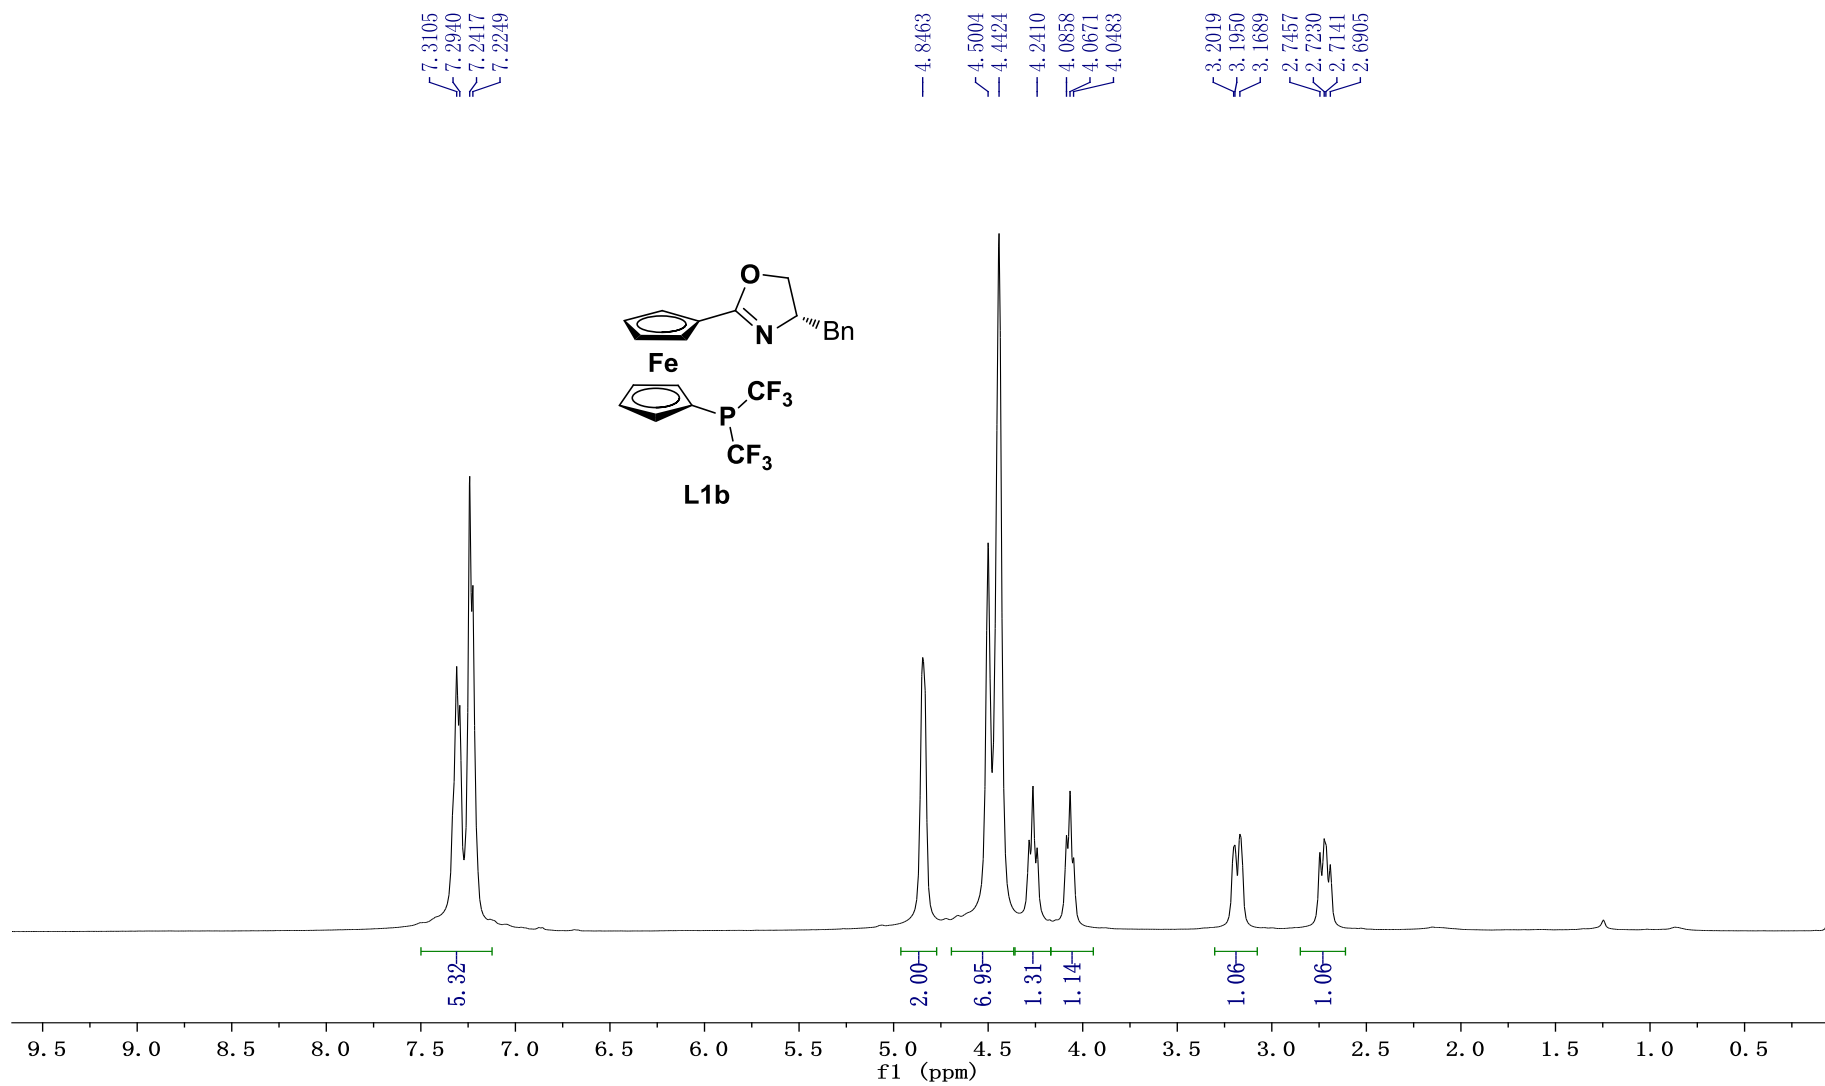

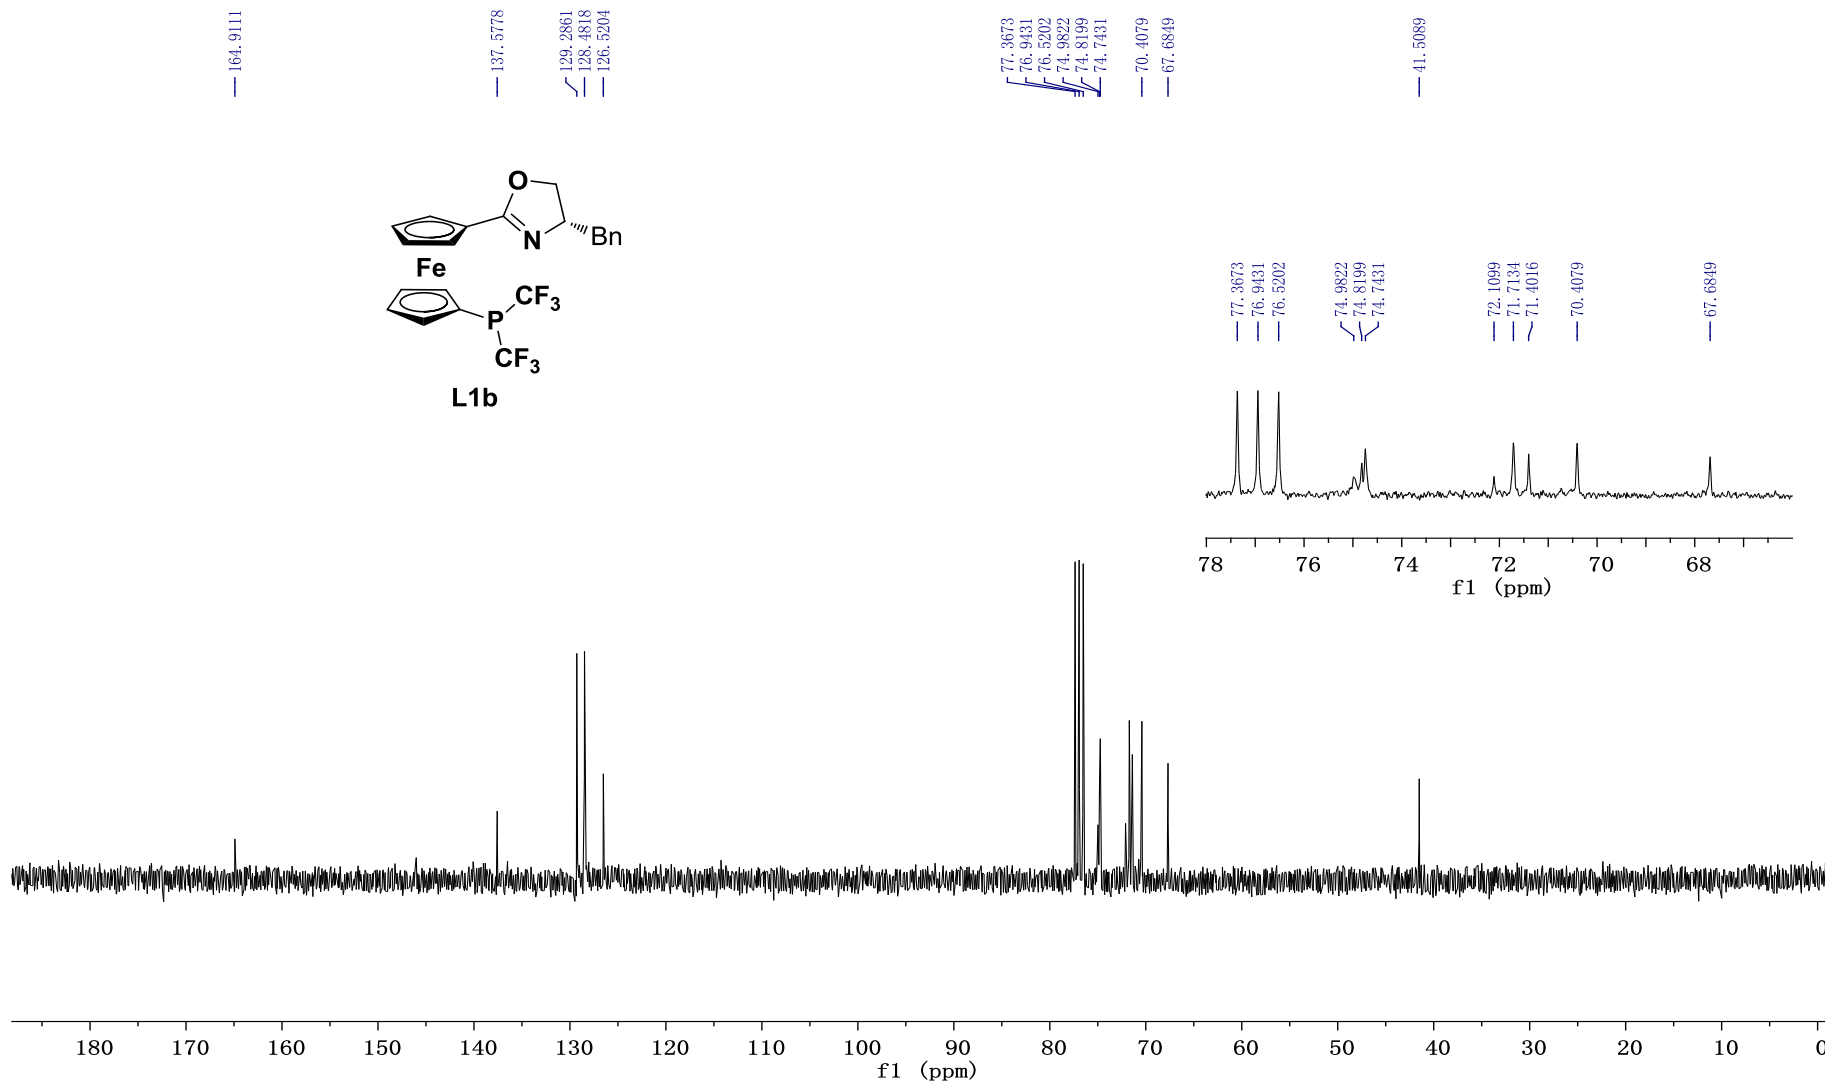

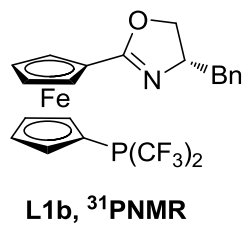

-0.3809  
-0.8337  
-1.2860  
-1.7382  
-2.1907  
-2.6128  
-3.0954

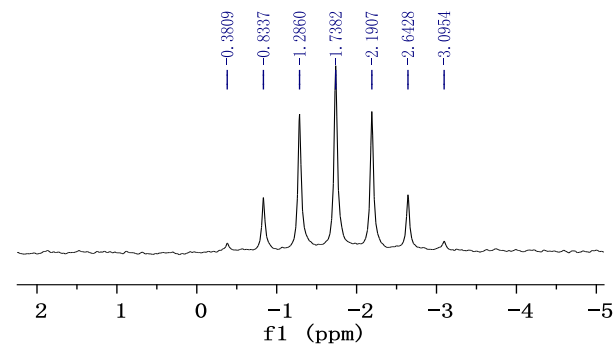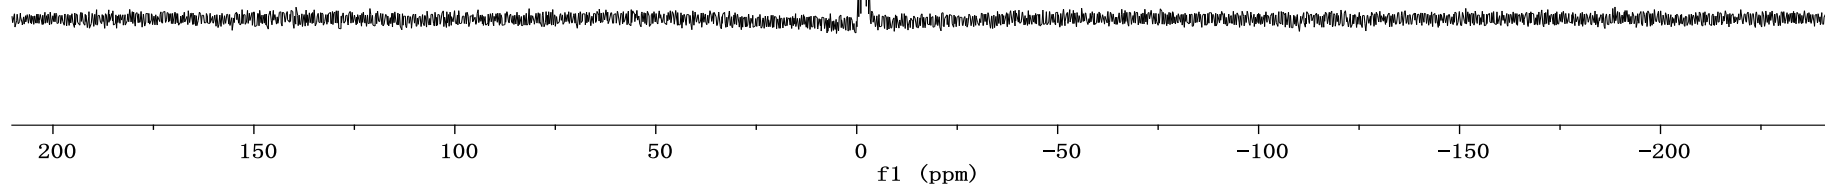



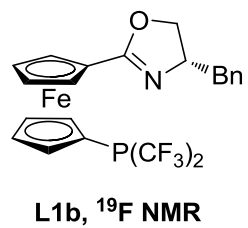

-53.6980  
-53.7152  
-53.7336  
-53.7489  
-53.7657  
-53.8927  
-53.9100  
-53.9287  
-53.9437  
-53.9605

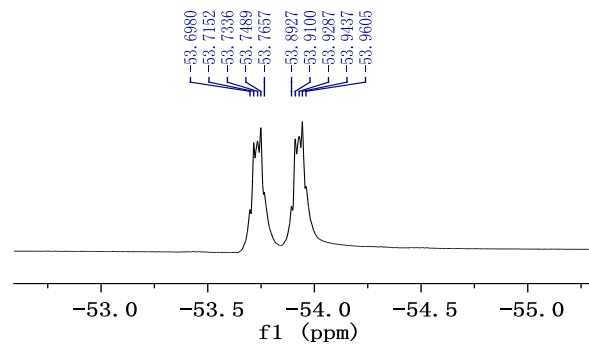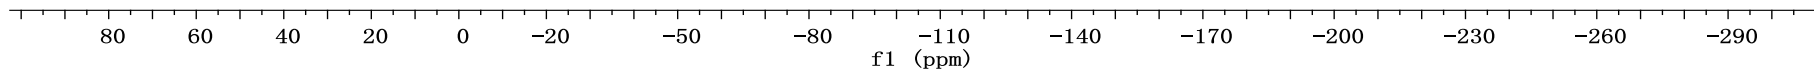

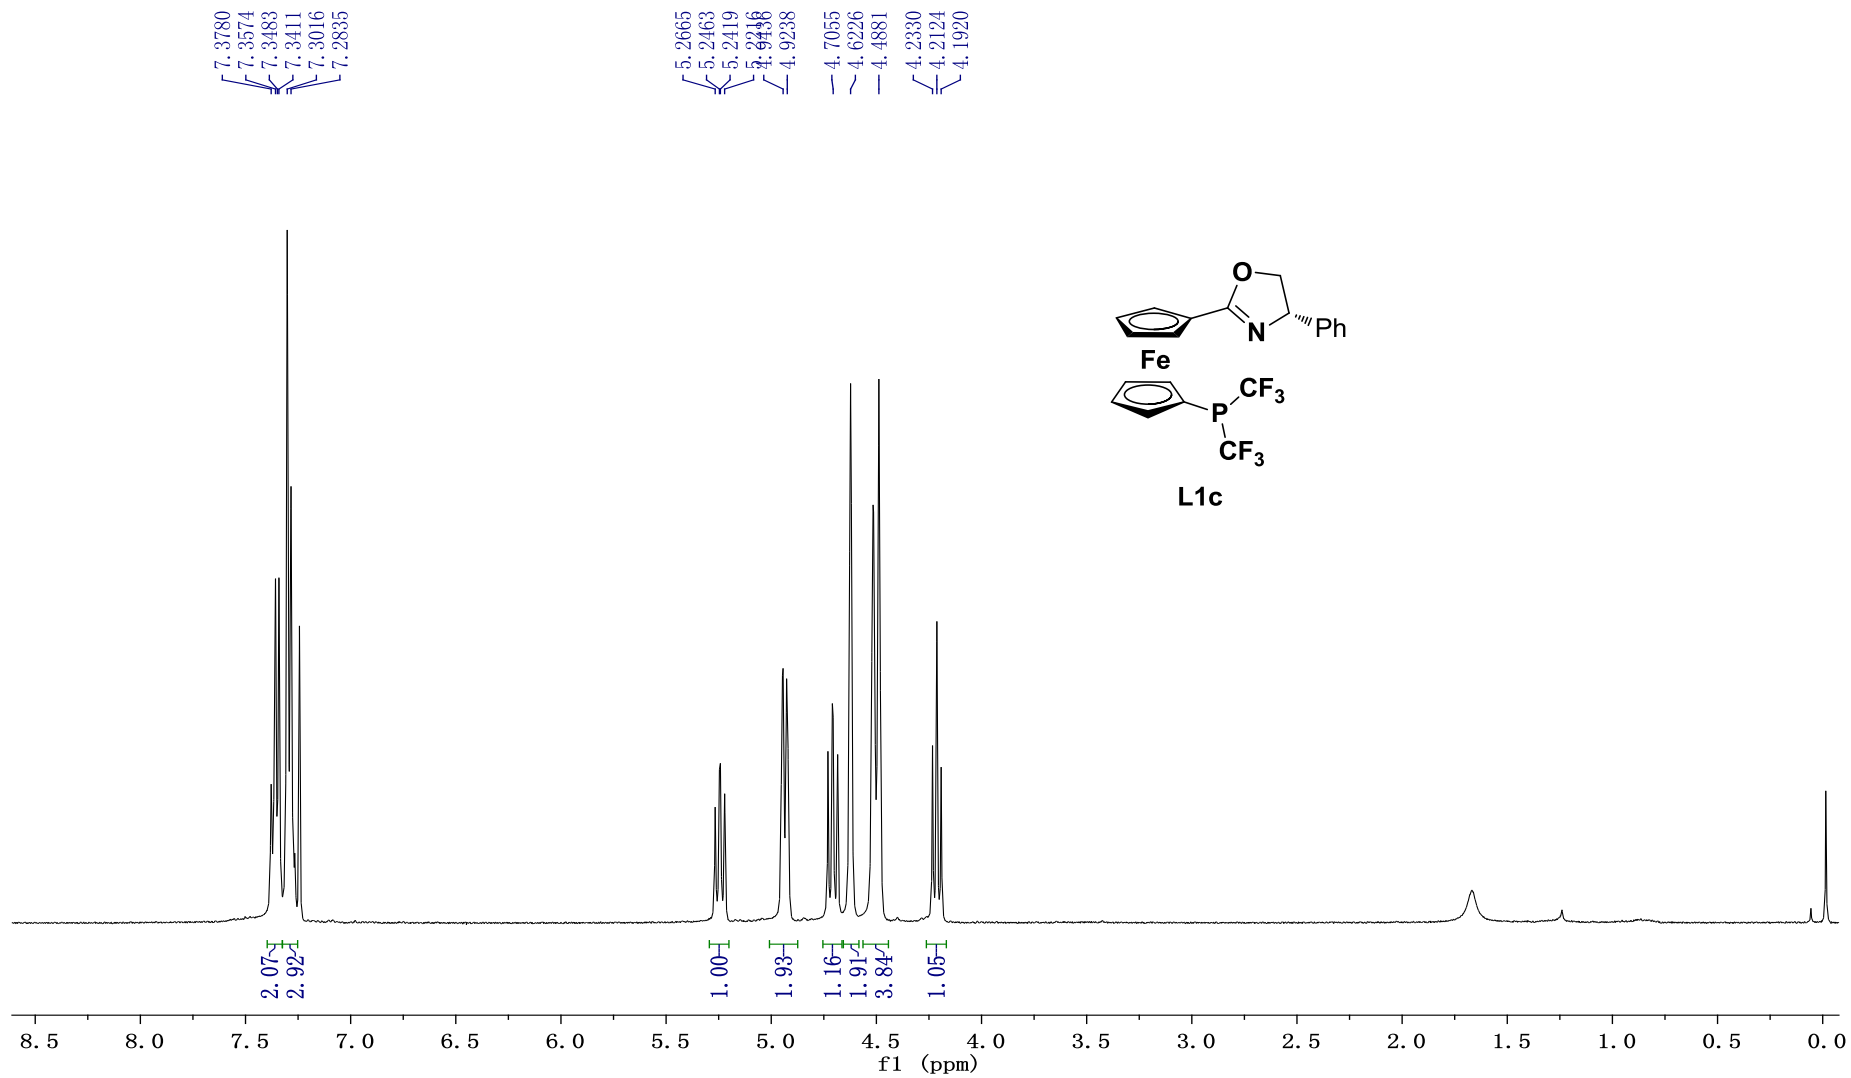

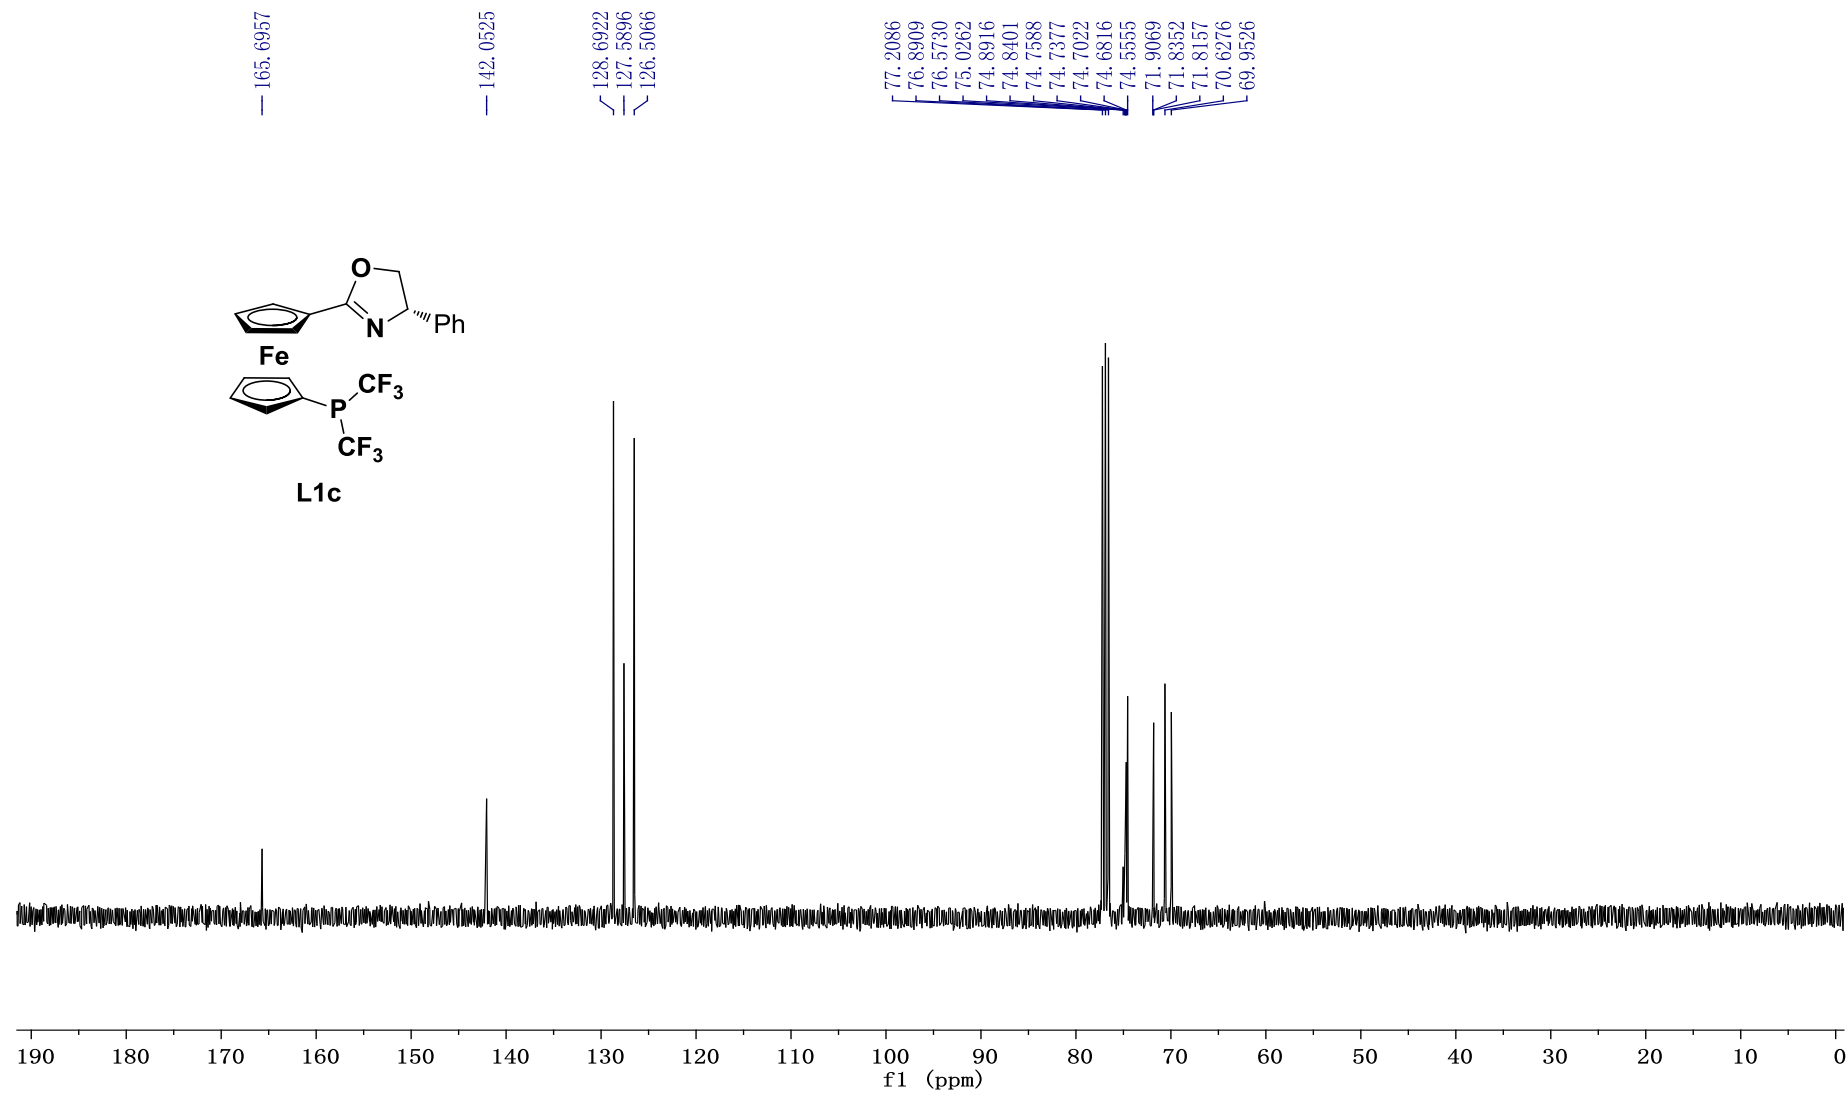

-0.56  
-1.01  
-1.47  
-1.92  
-2.37  
-2.83

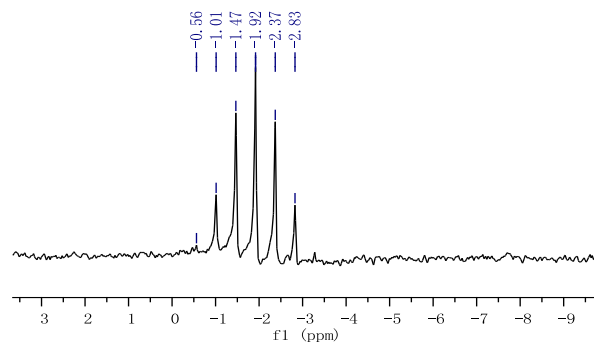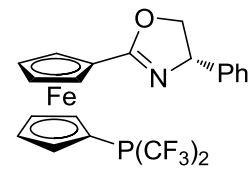

L1c,  $^{31}P$ NMR

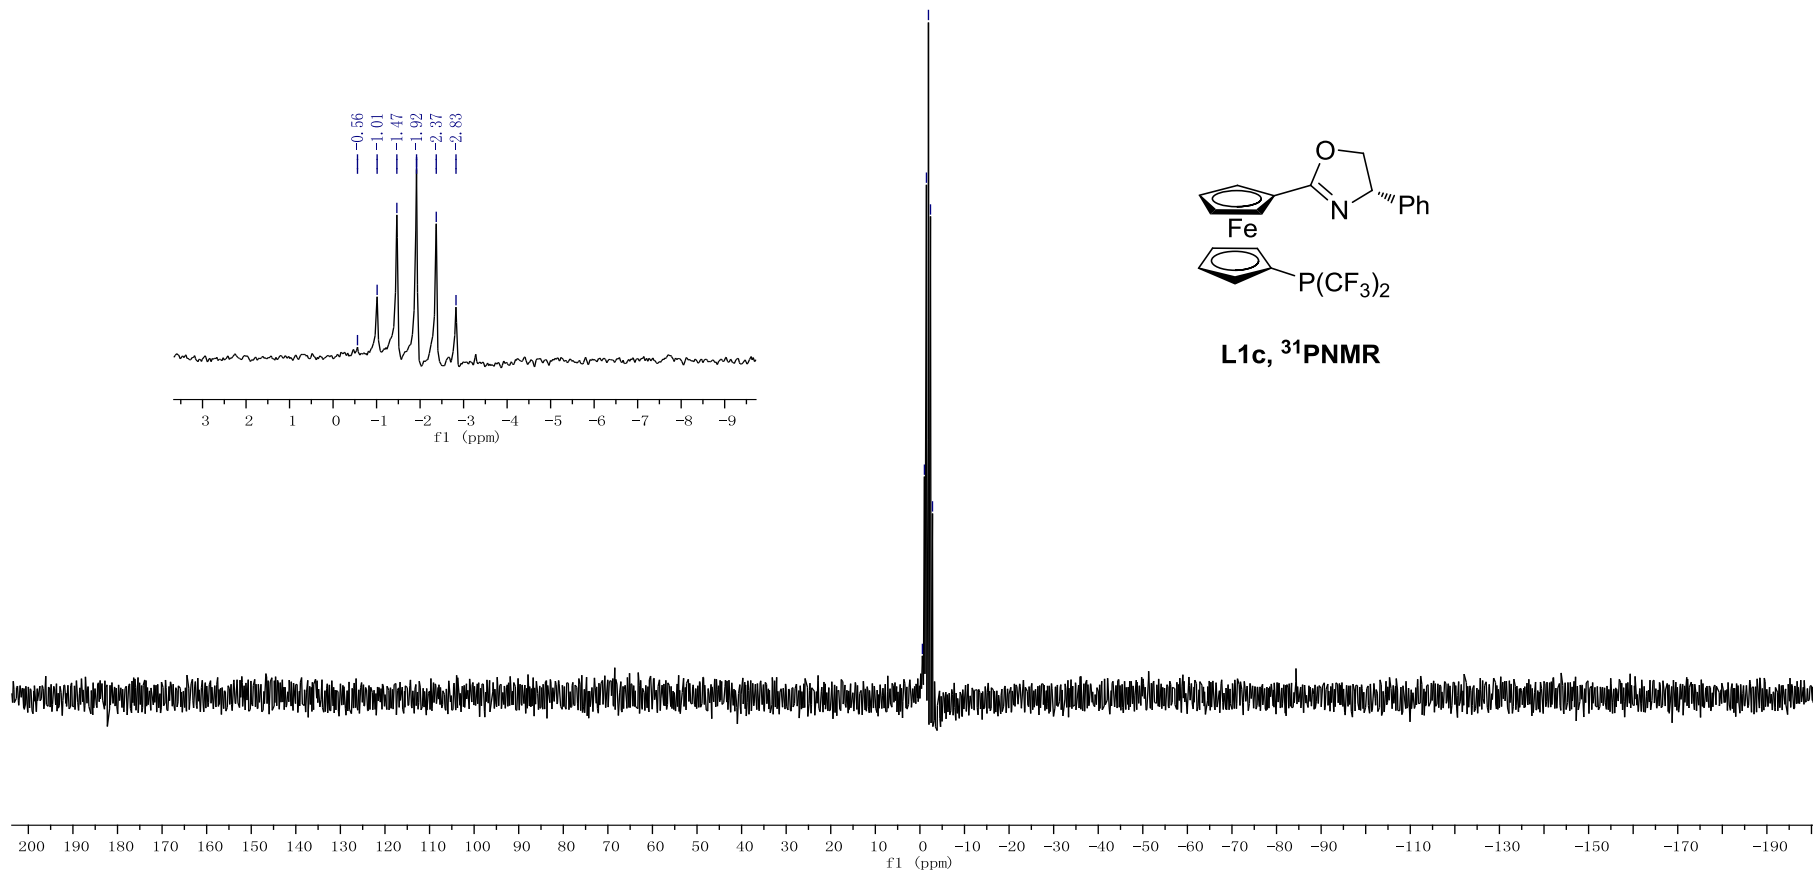

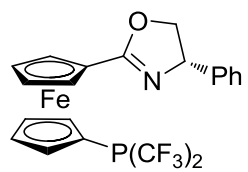

**L1c,  $^{19}\text{F}$  NMR**

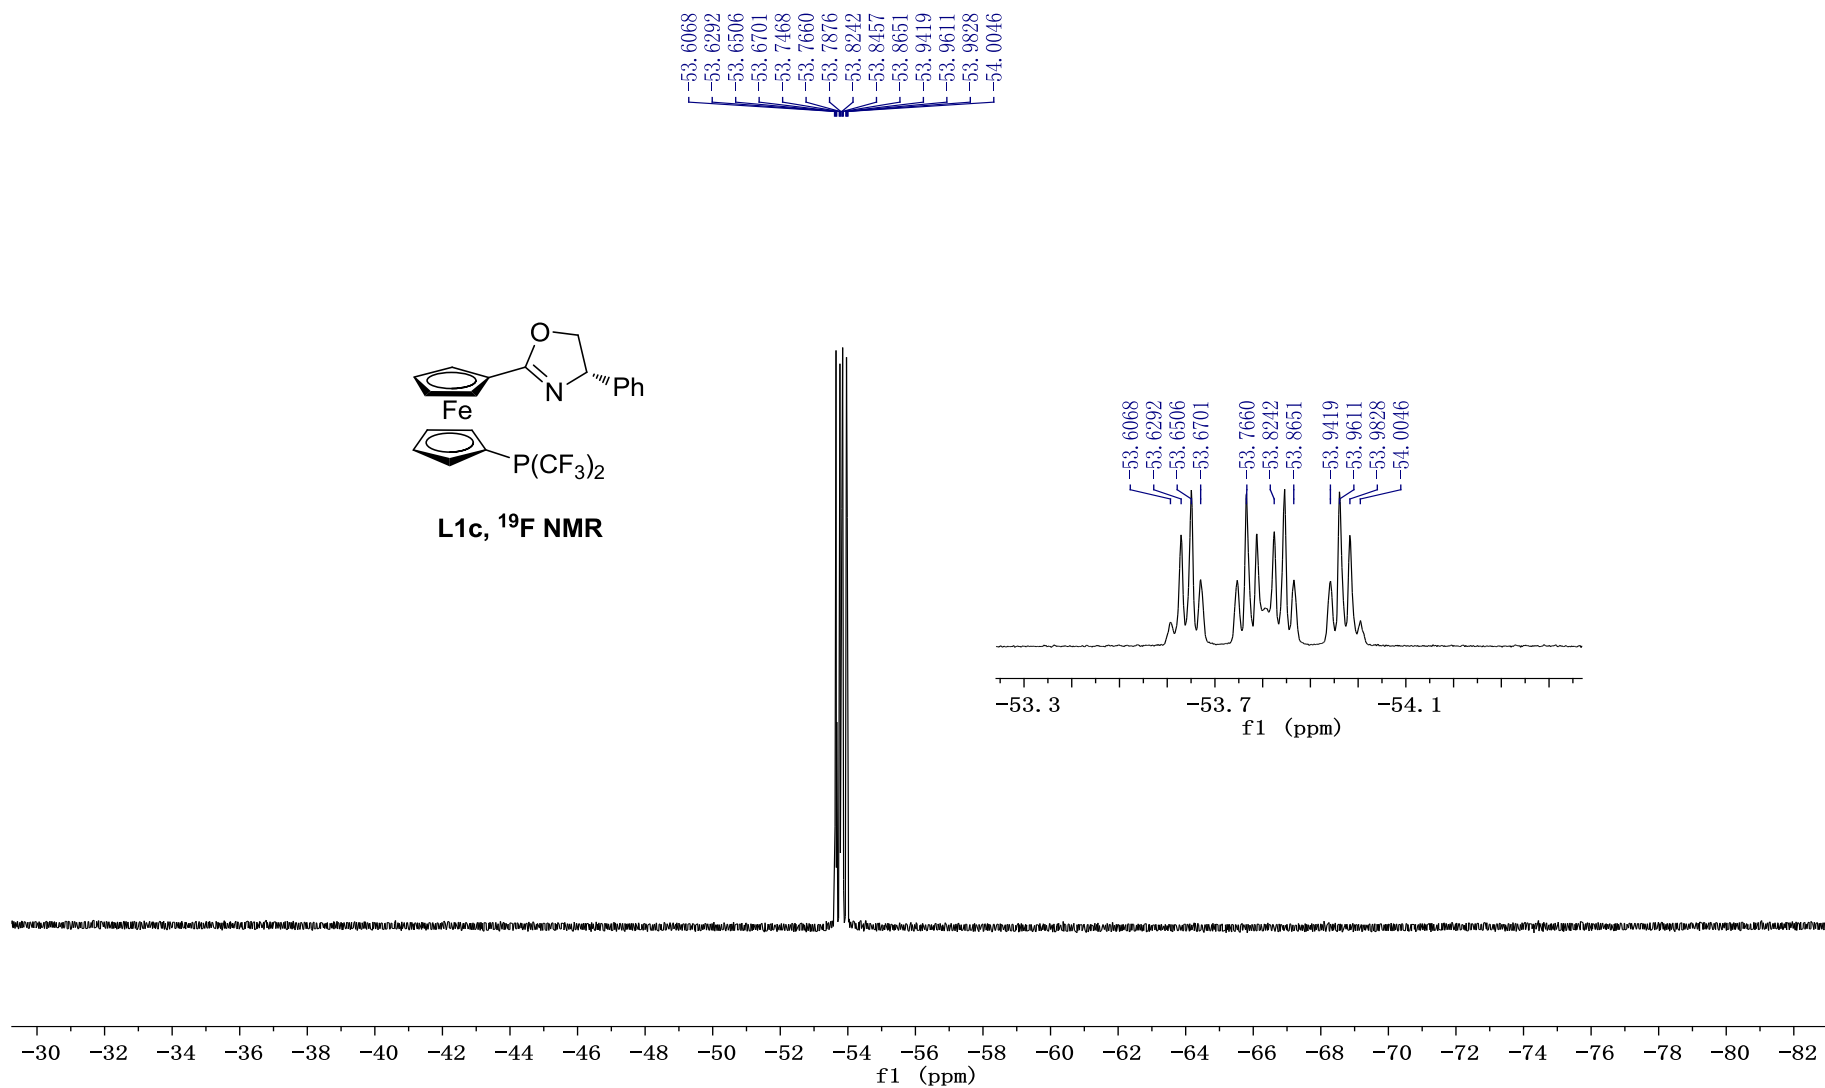

— 7.2620

— 4.8911  
— 4.8309  
— 4.5935  
— 4.4469  
— 4.2422  
— 4.1396  
— 3.9464  
— 3.9203  
— 3.9128  
— 3.8869

— 0.9600

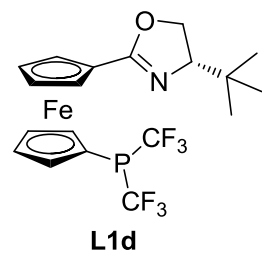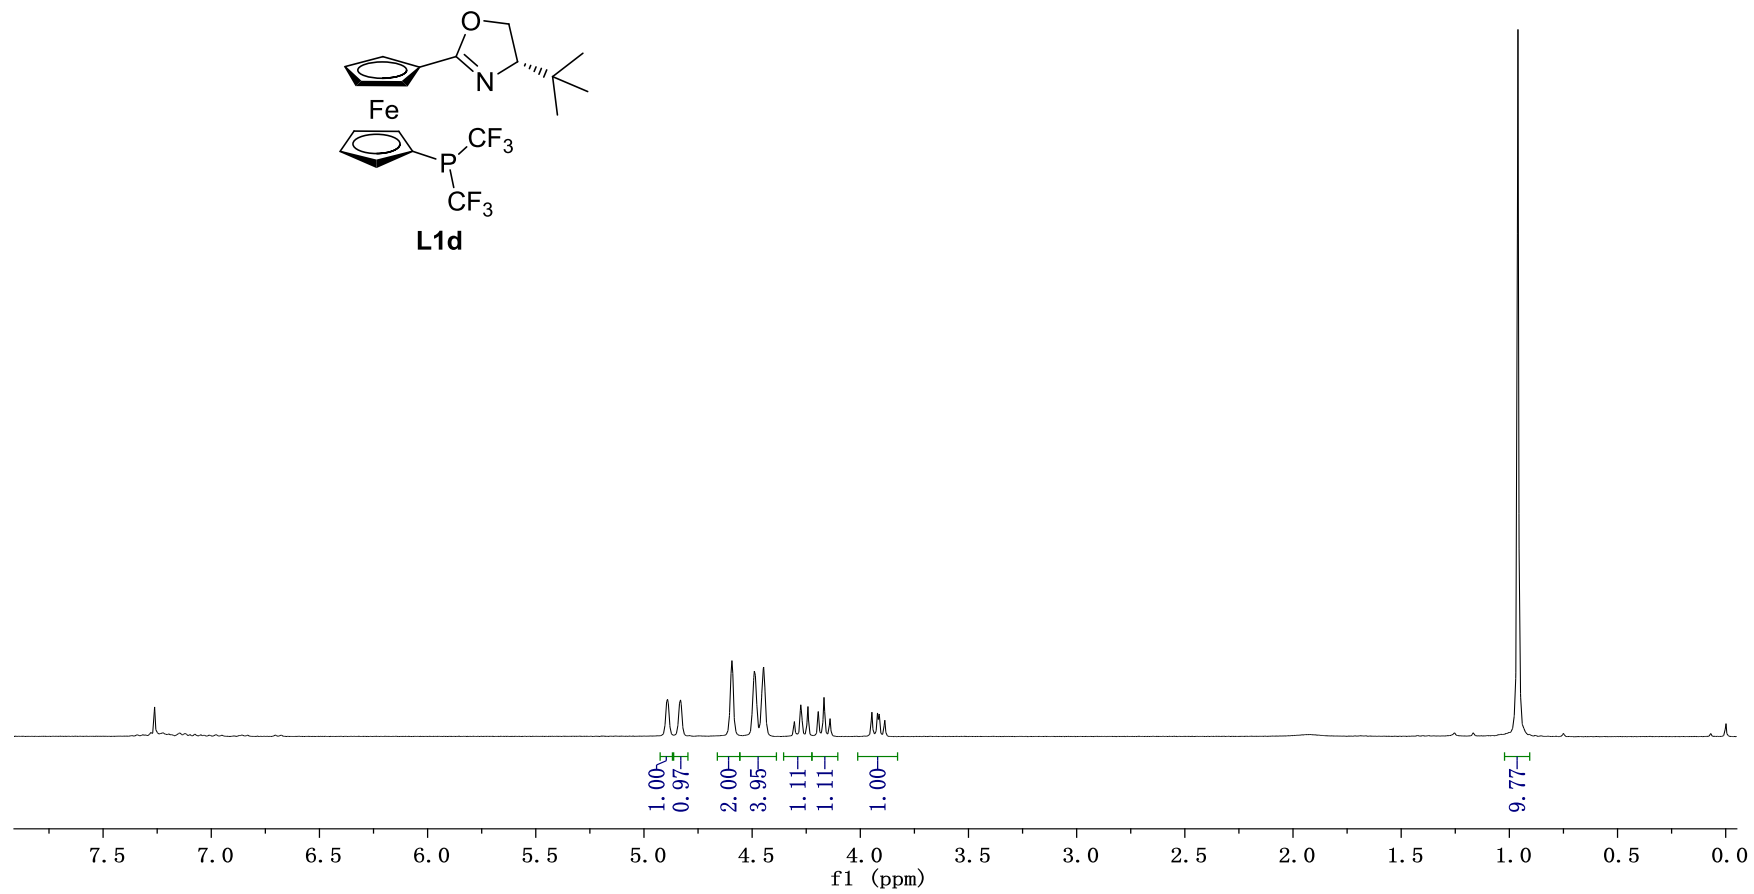

— 163.9973

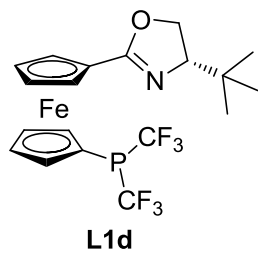

77.2357  
76.9182  
76.5990  
76.0932  
74.8084  
74.6436  
74.6095  
74.5505  
72.7181  
71.5158  
71.4466  
70.3942  
68.4144

— 33.4458

— 25.8152

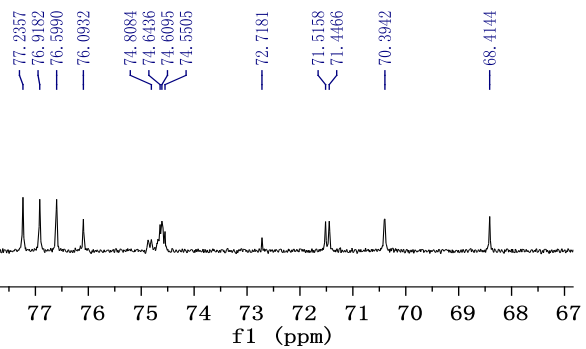

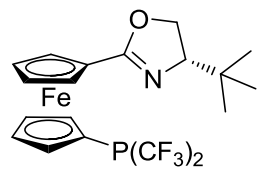

L1d,  $^{31}\text{P}$ NMR

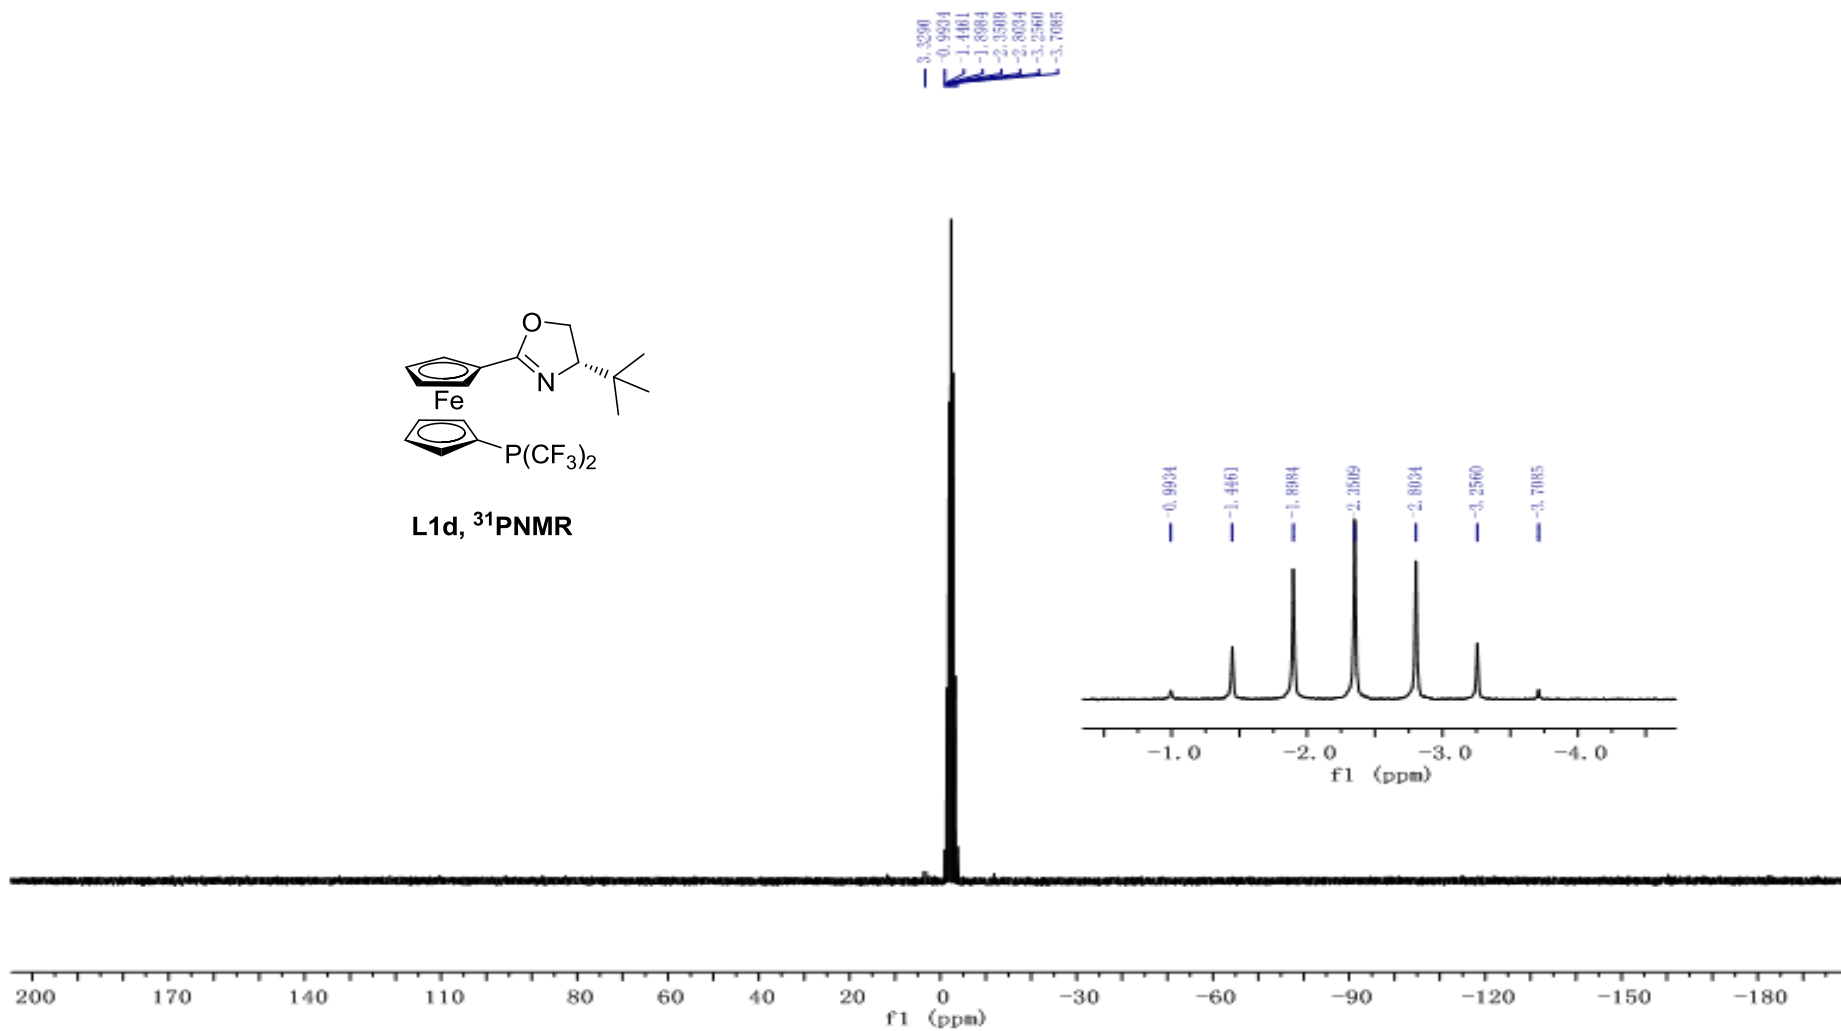



-54.1288  
-54.3883

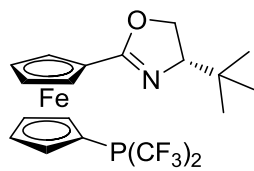

L1d, <sup>19</sup>F NMR

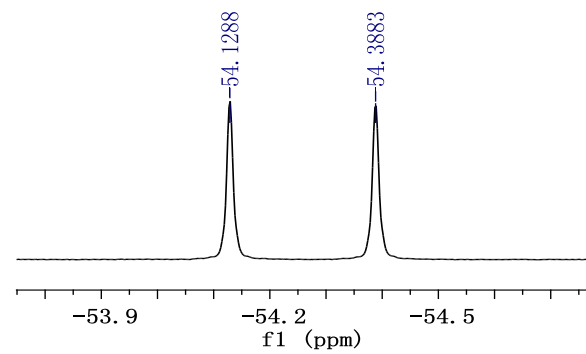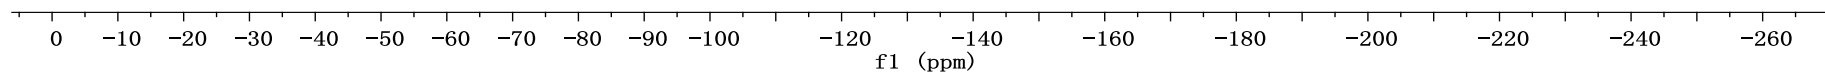

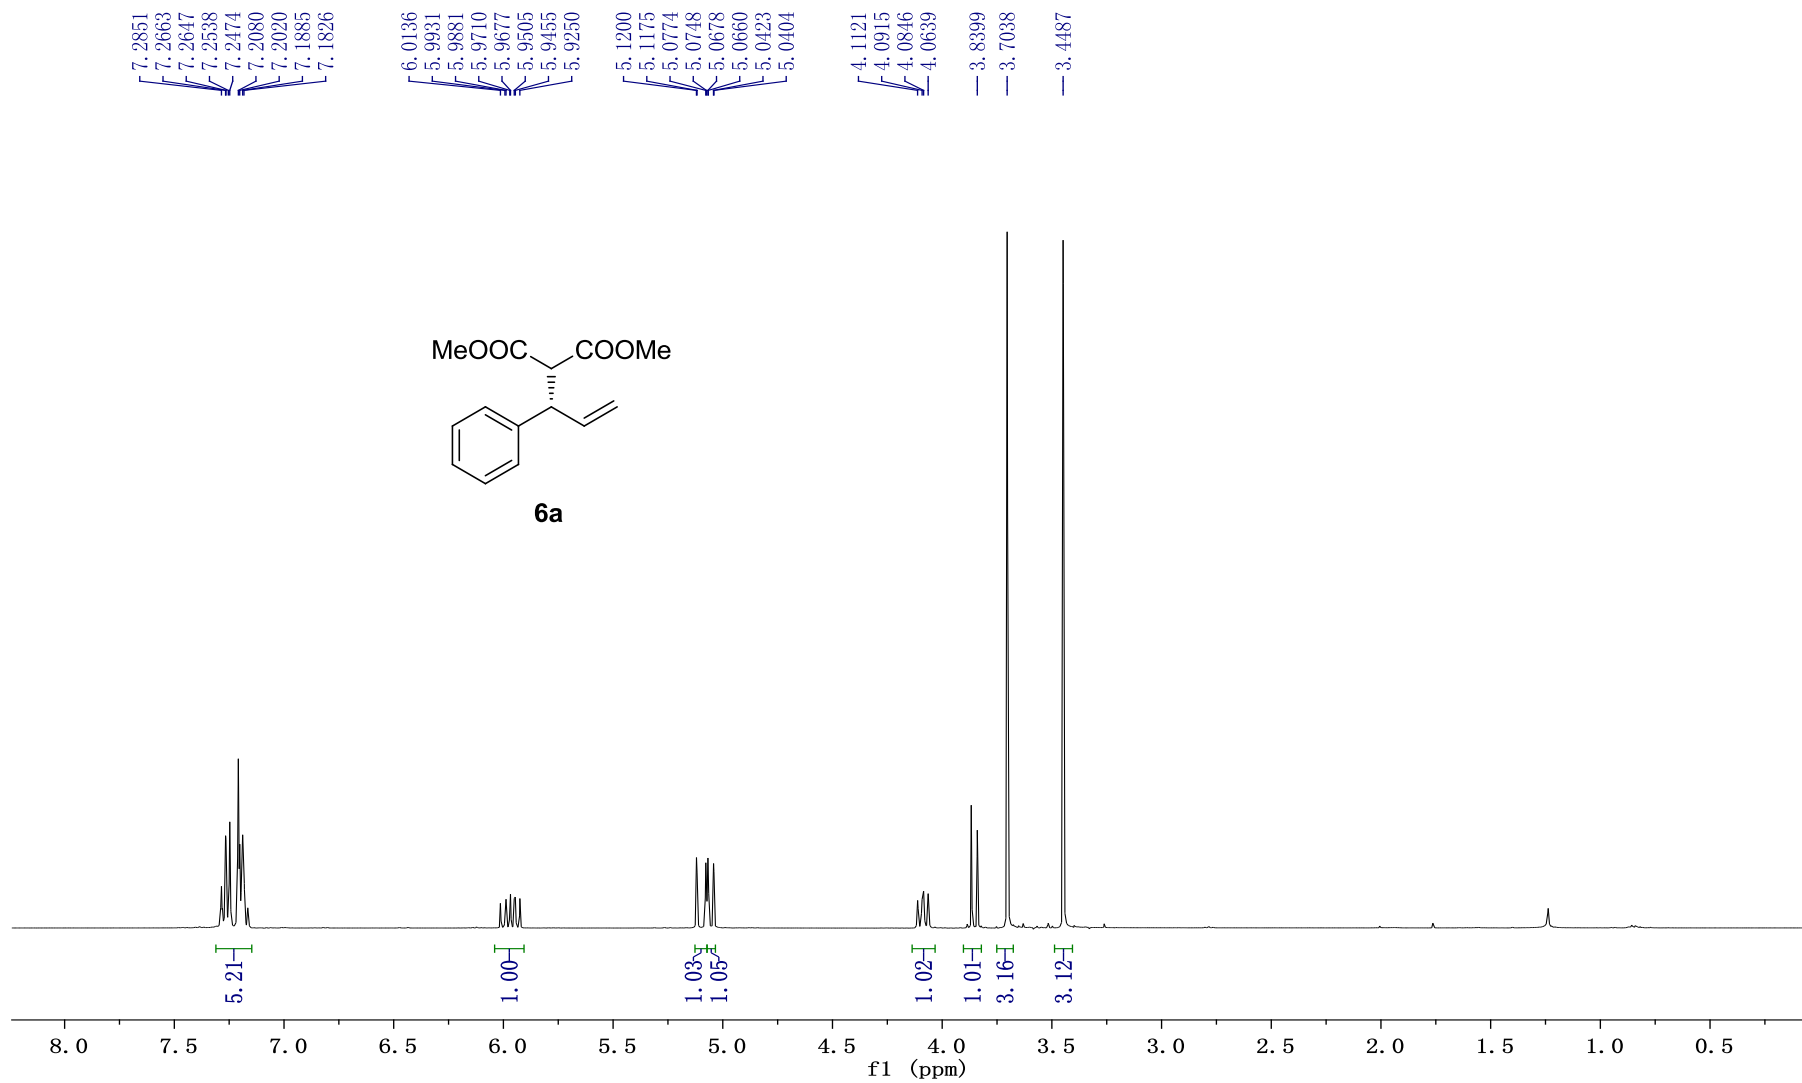

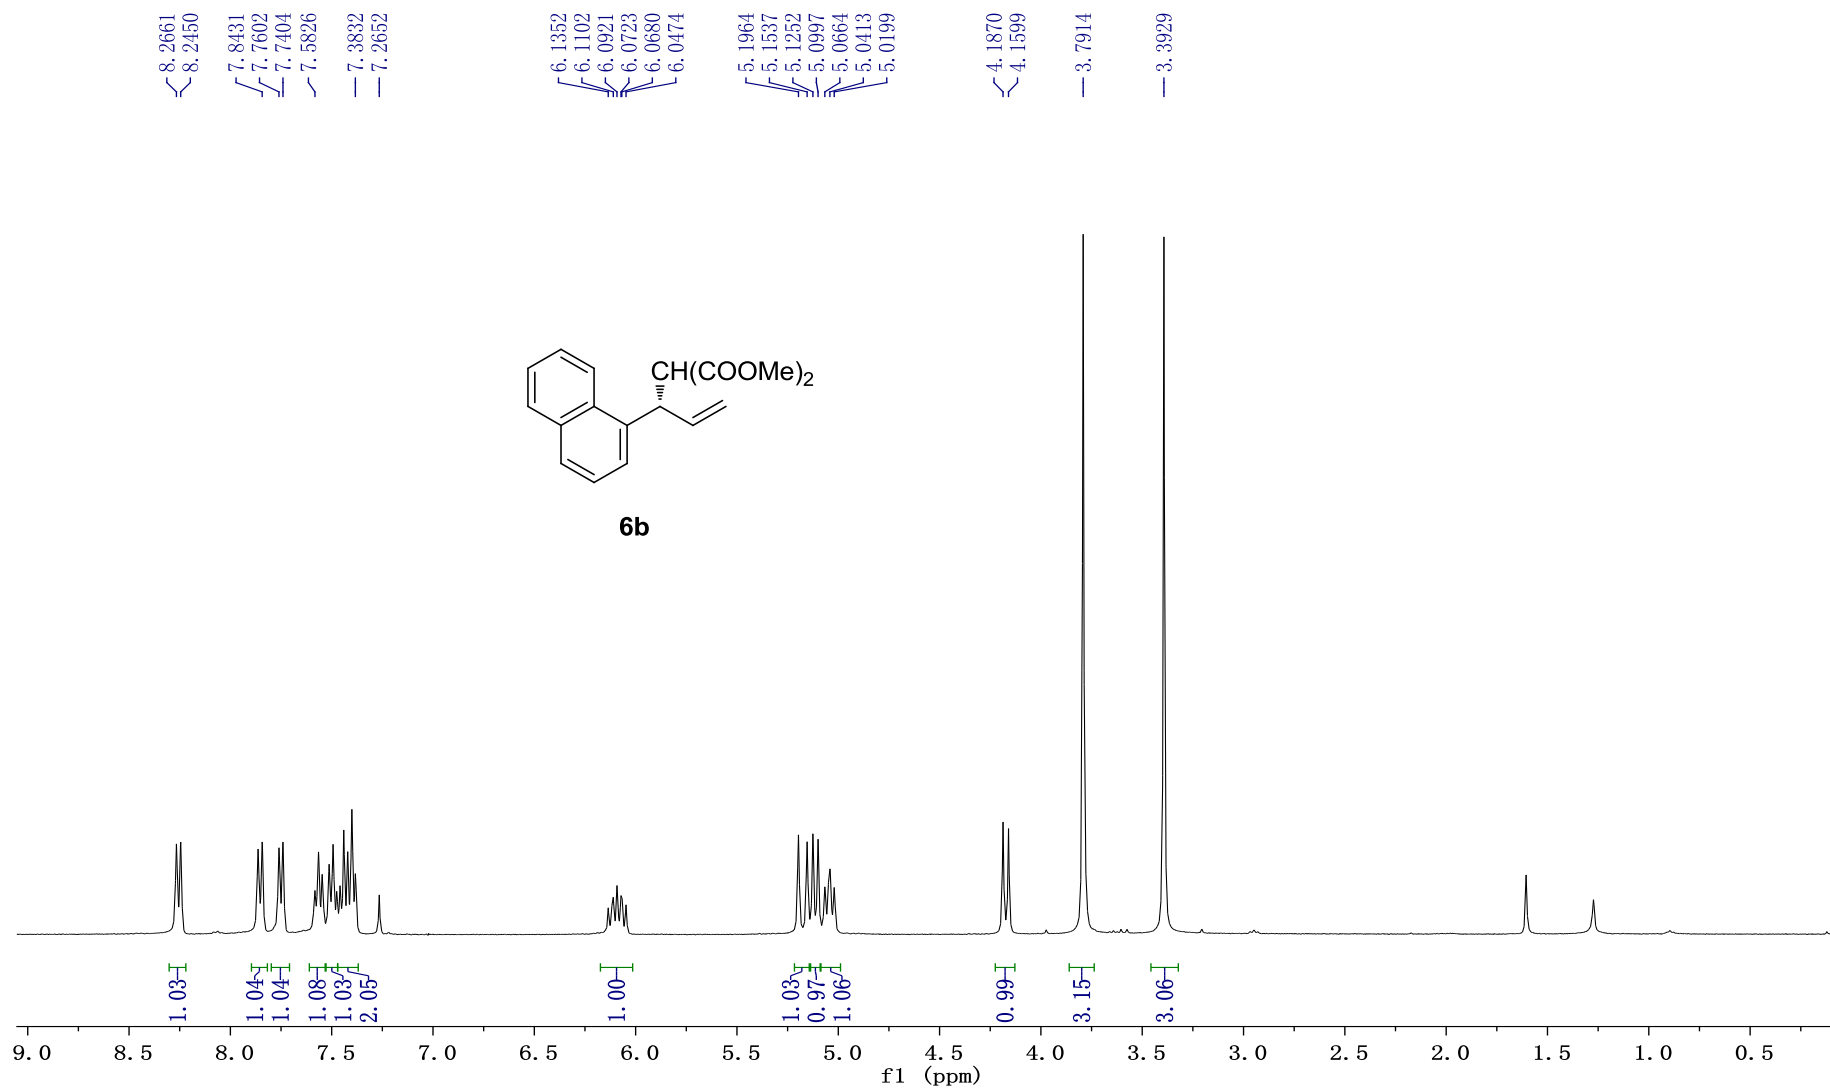

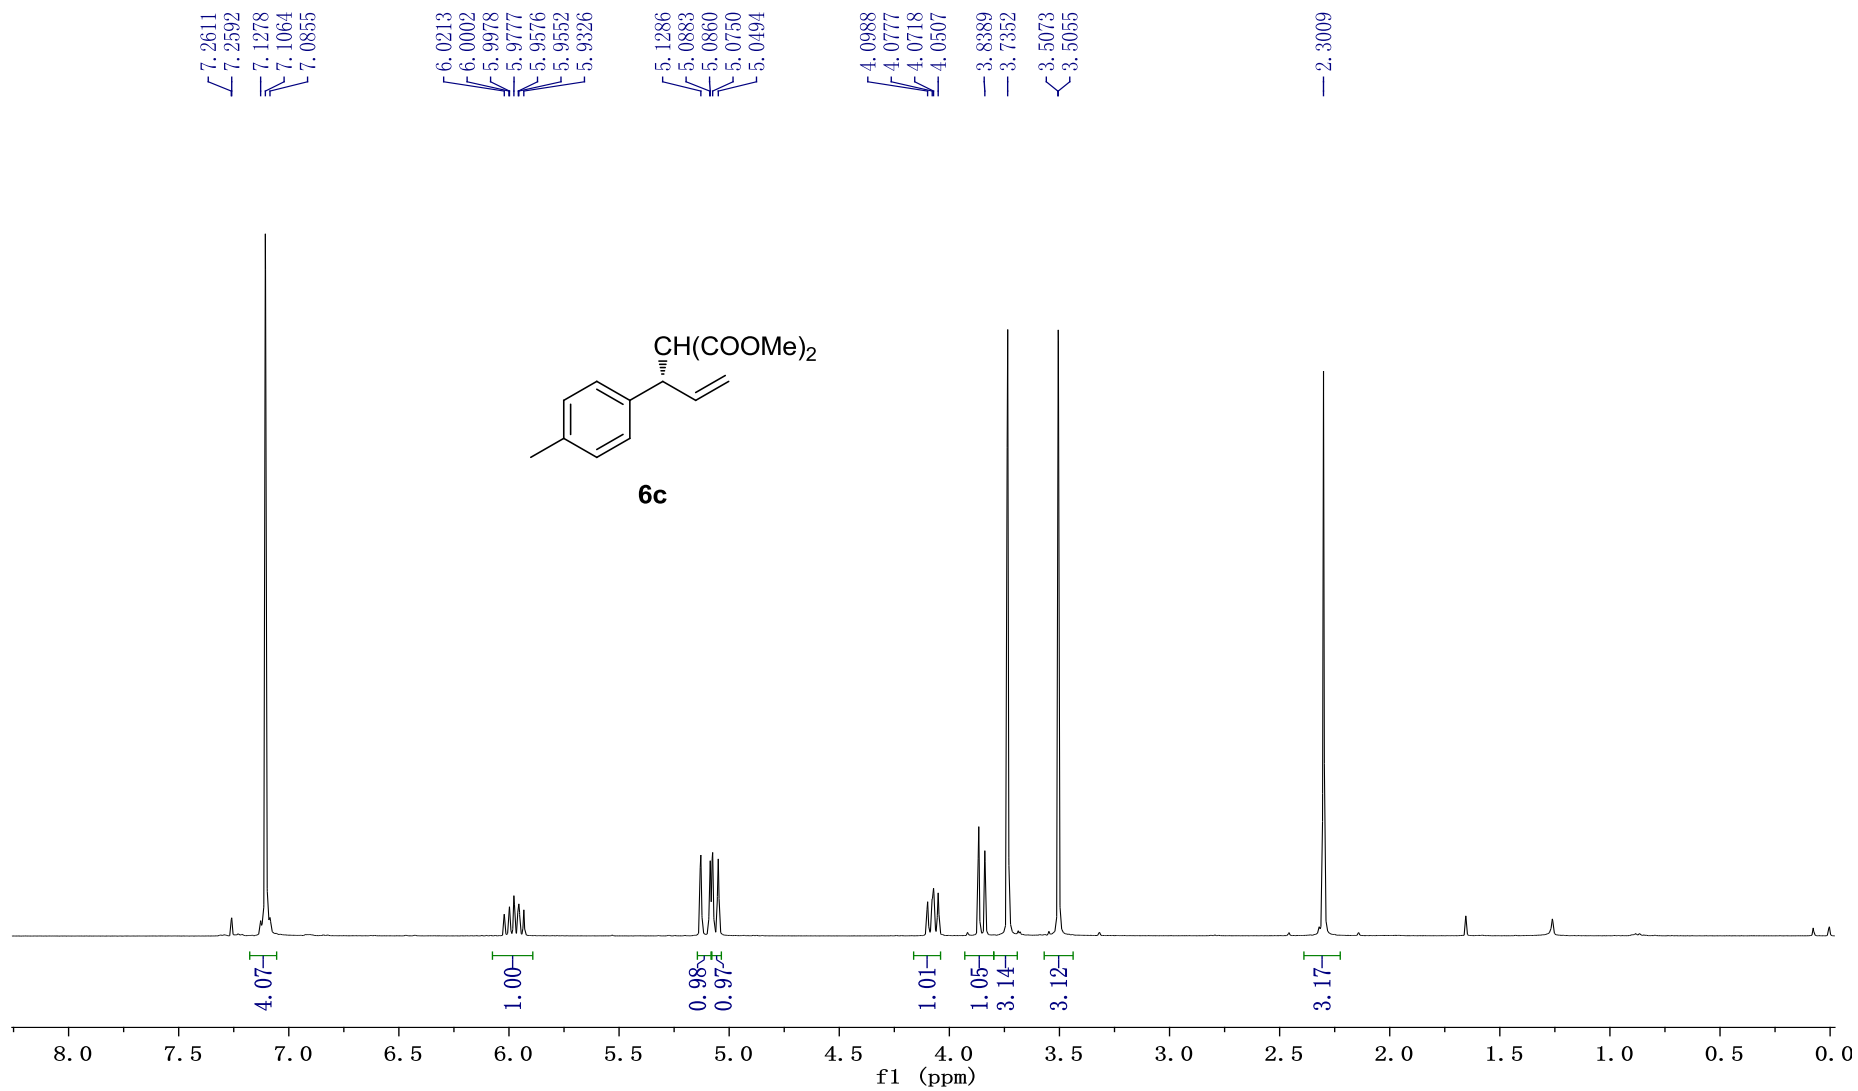

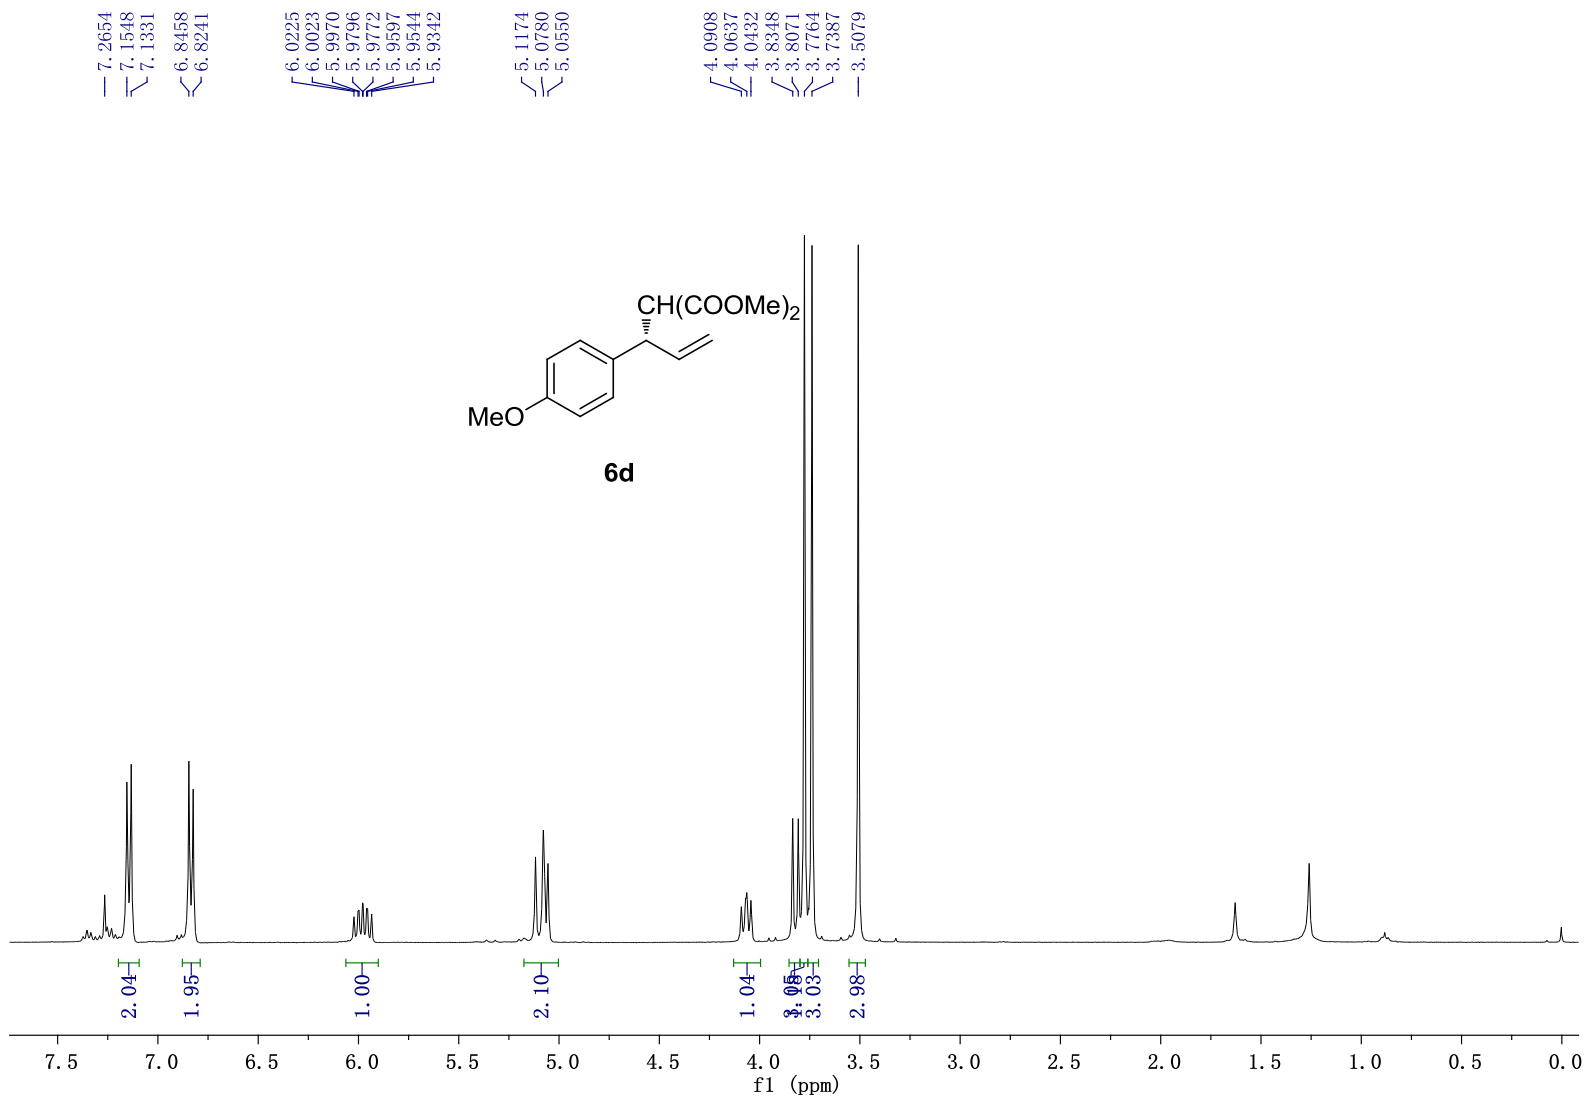

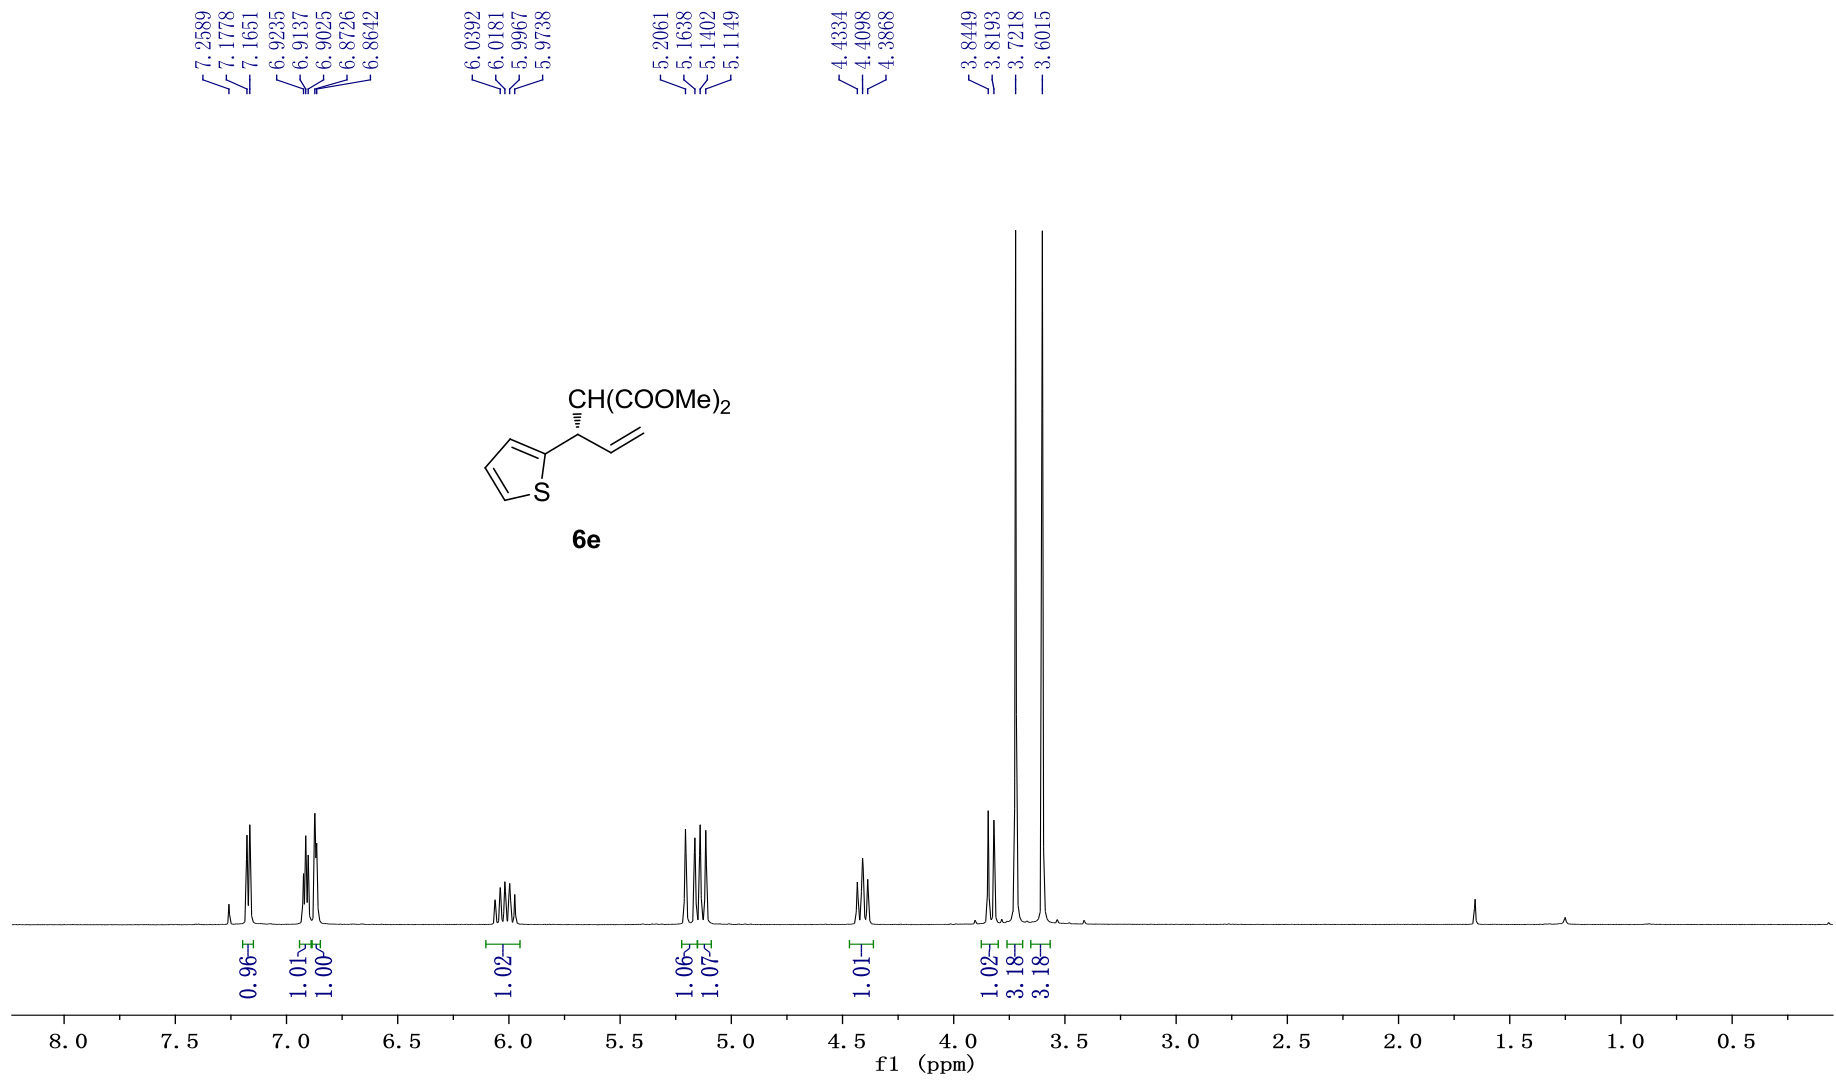

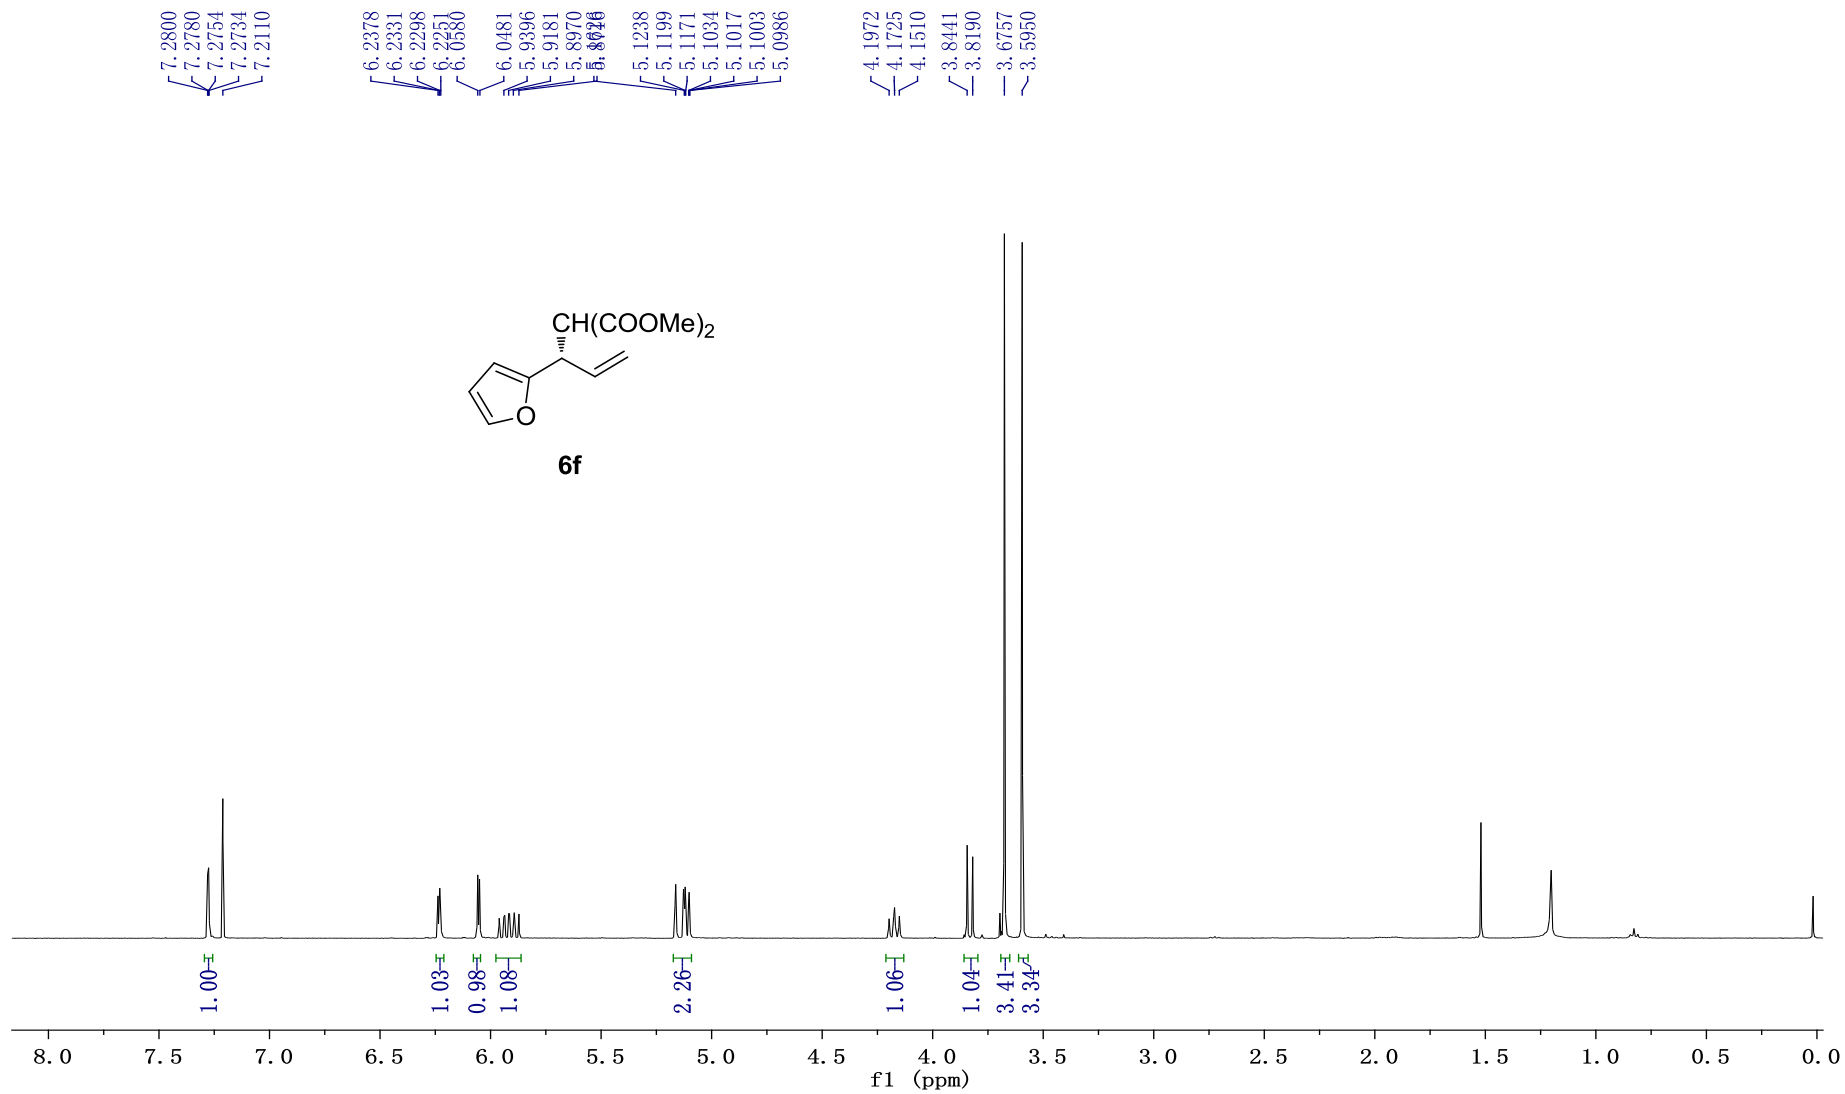

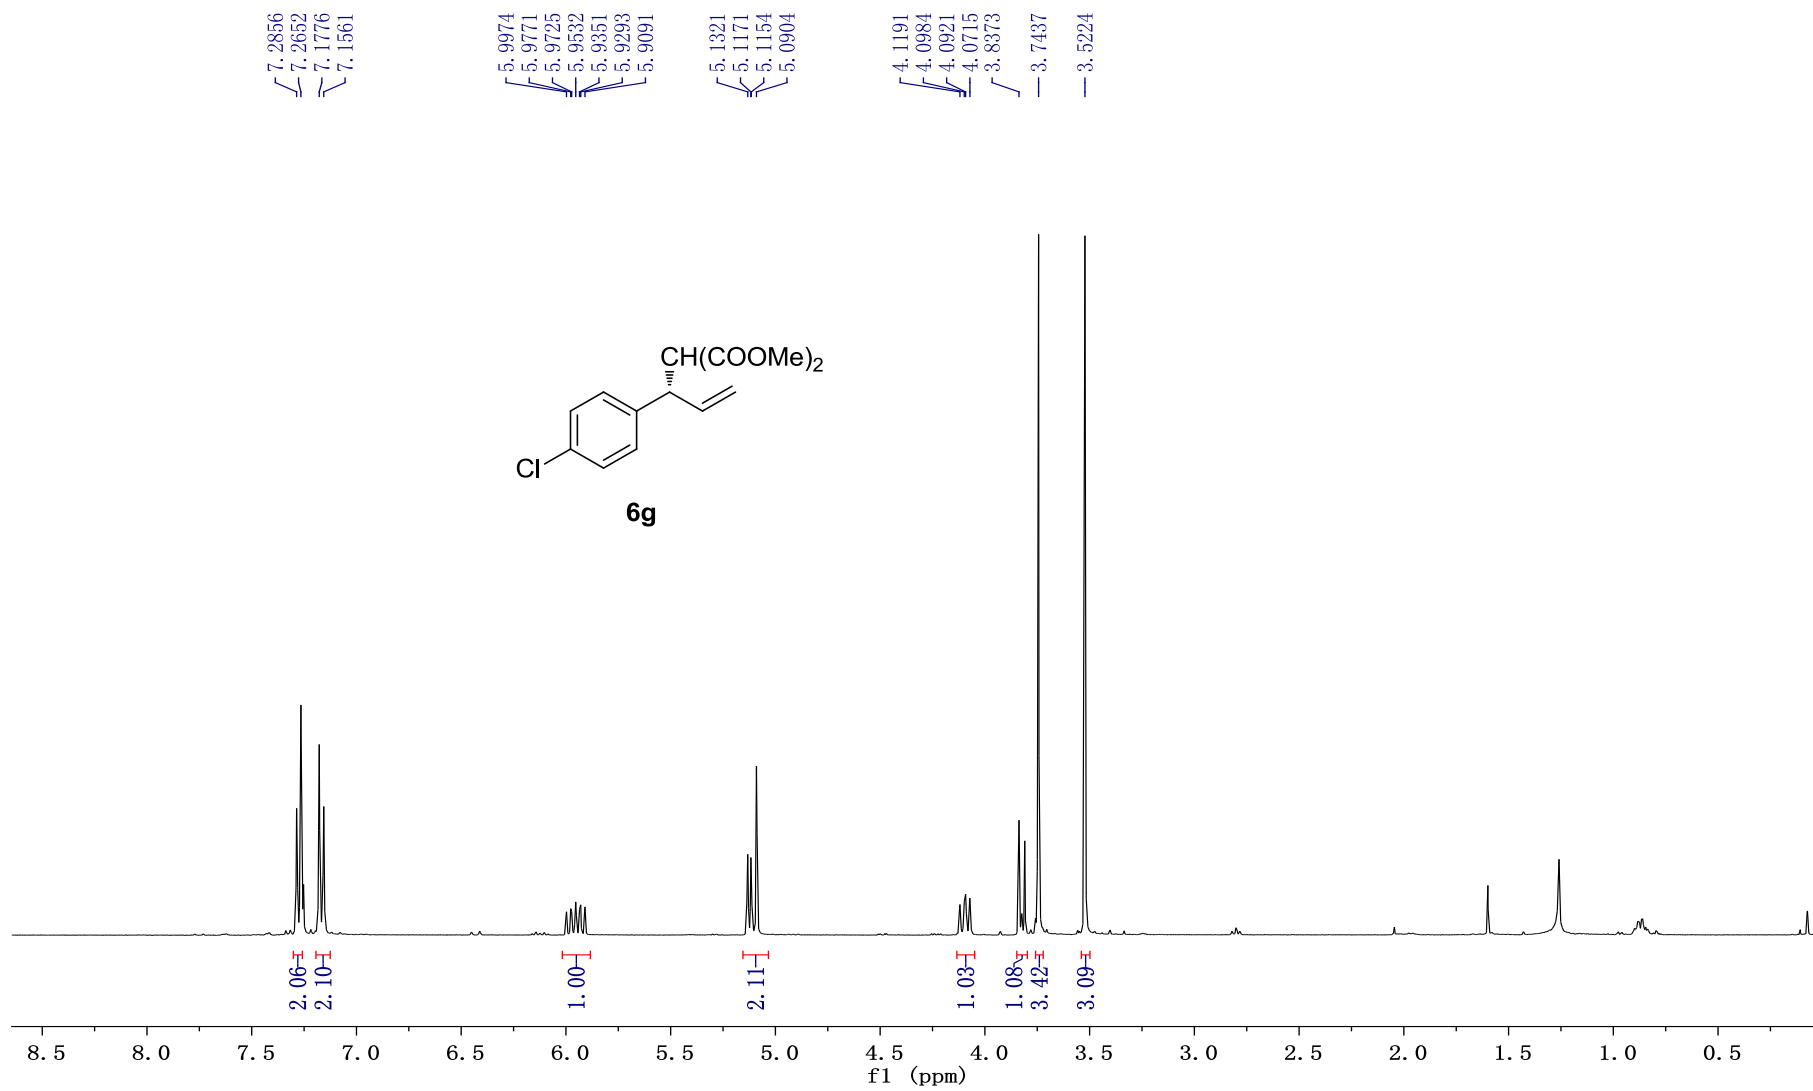



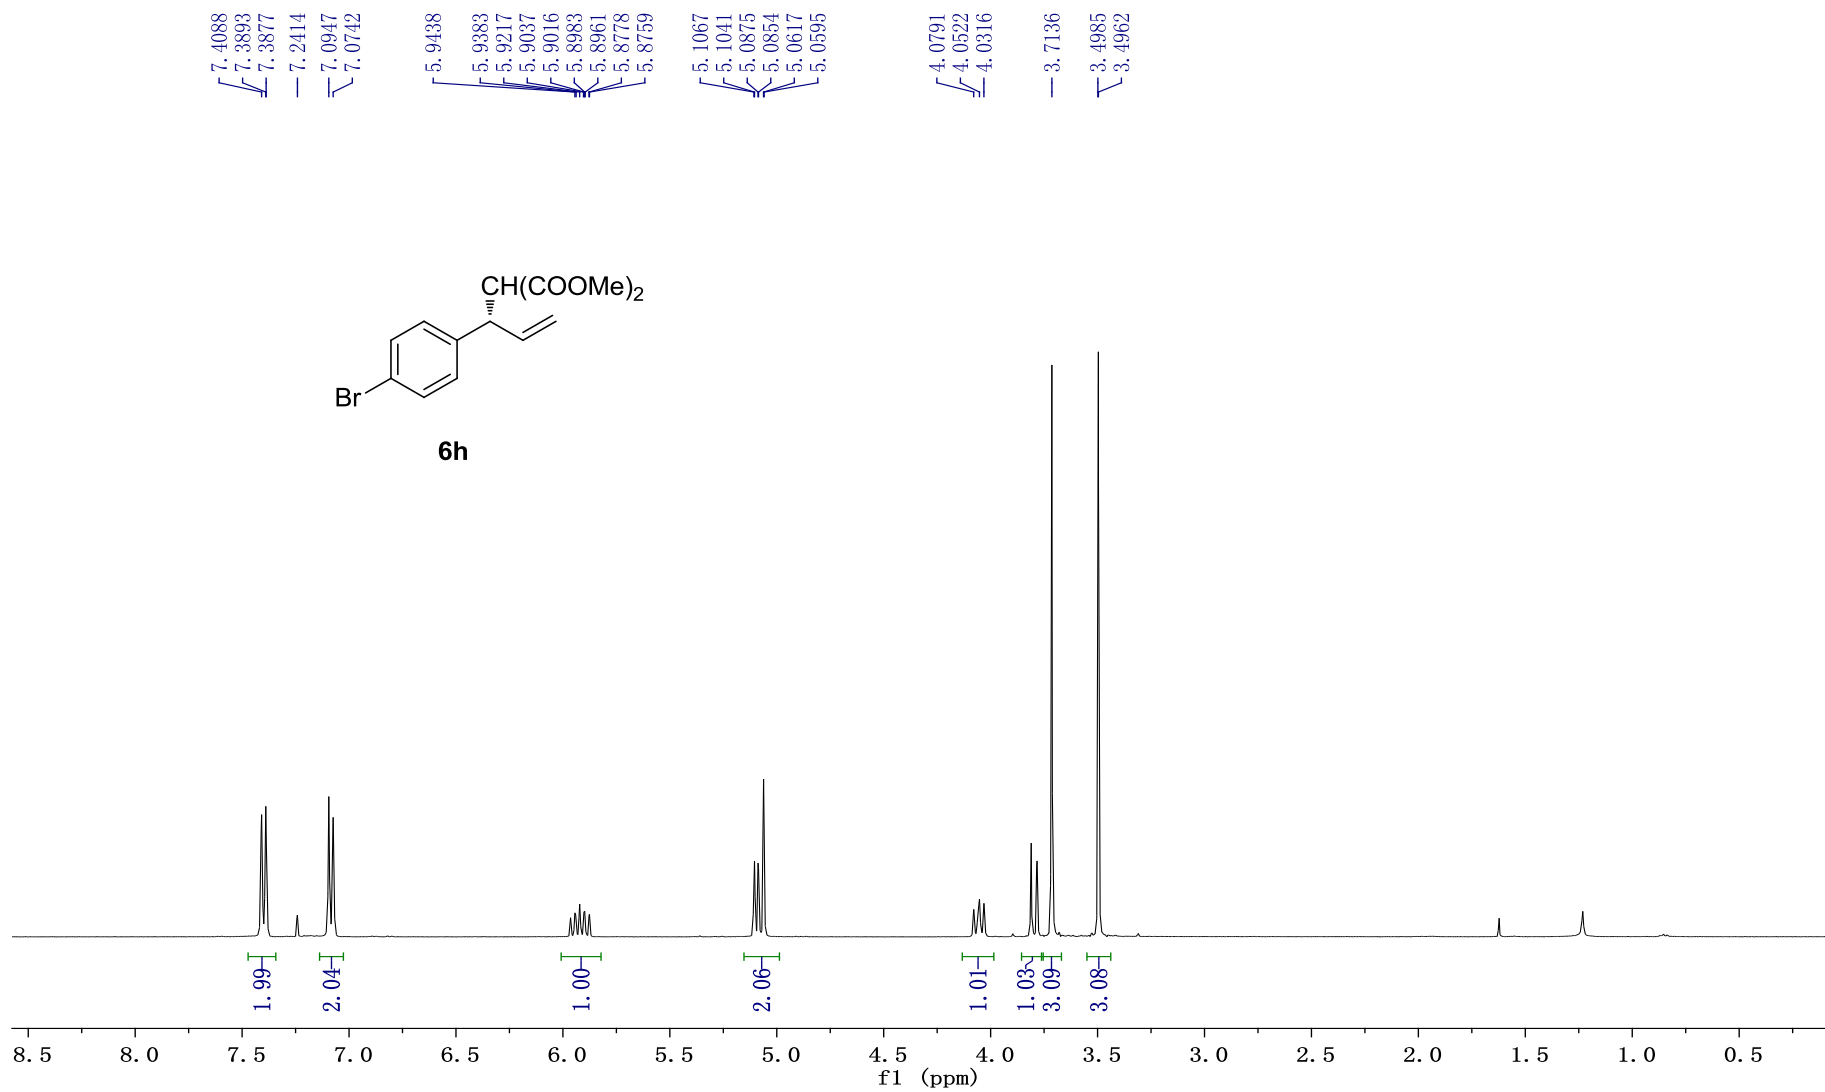

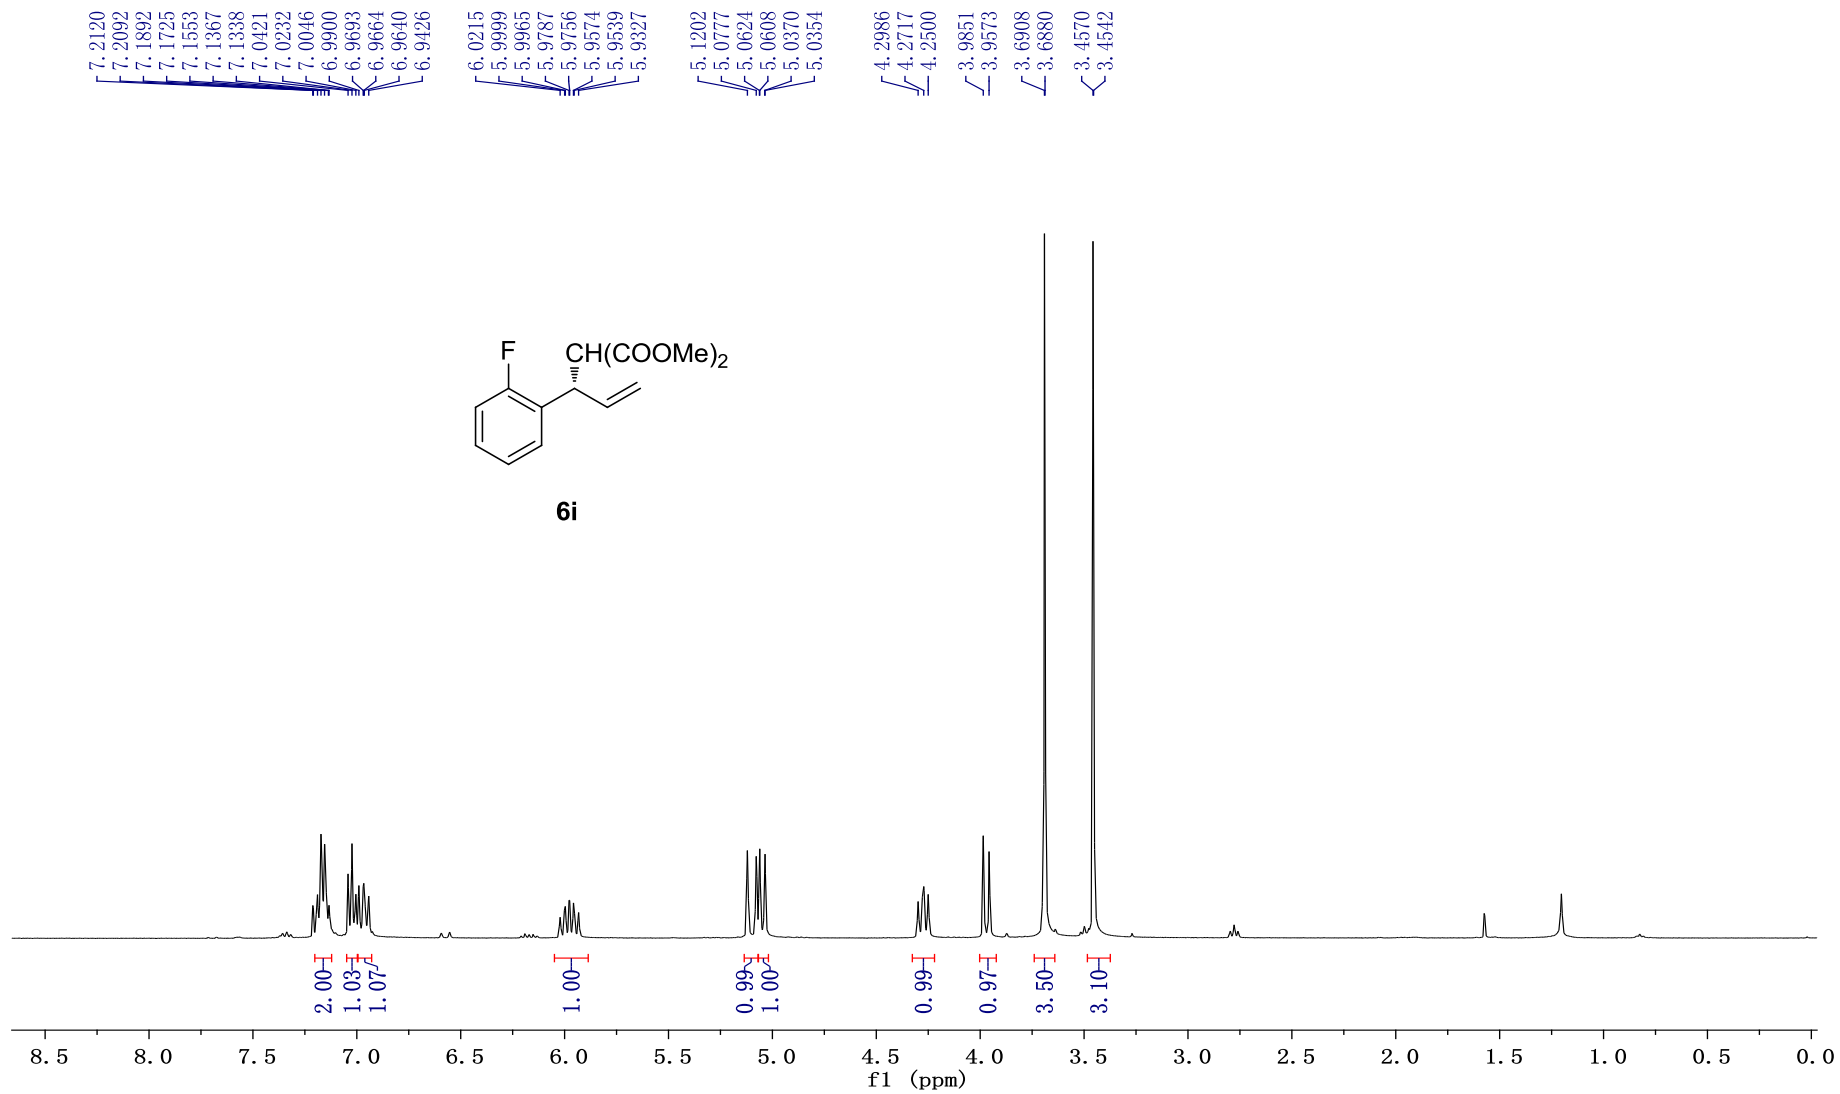

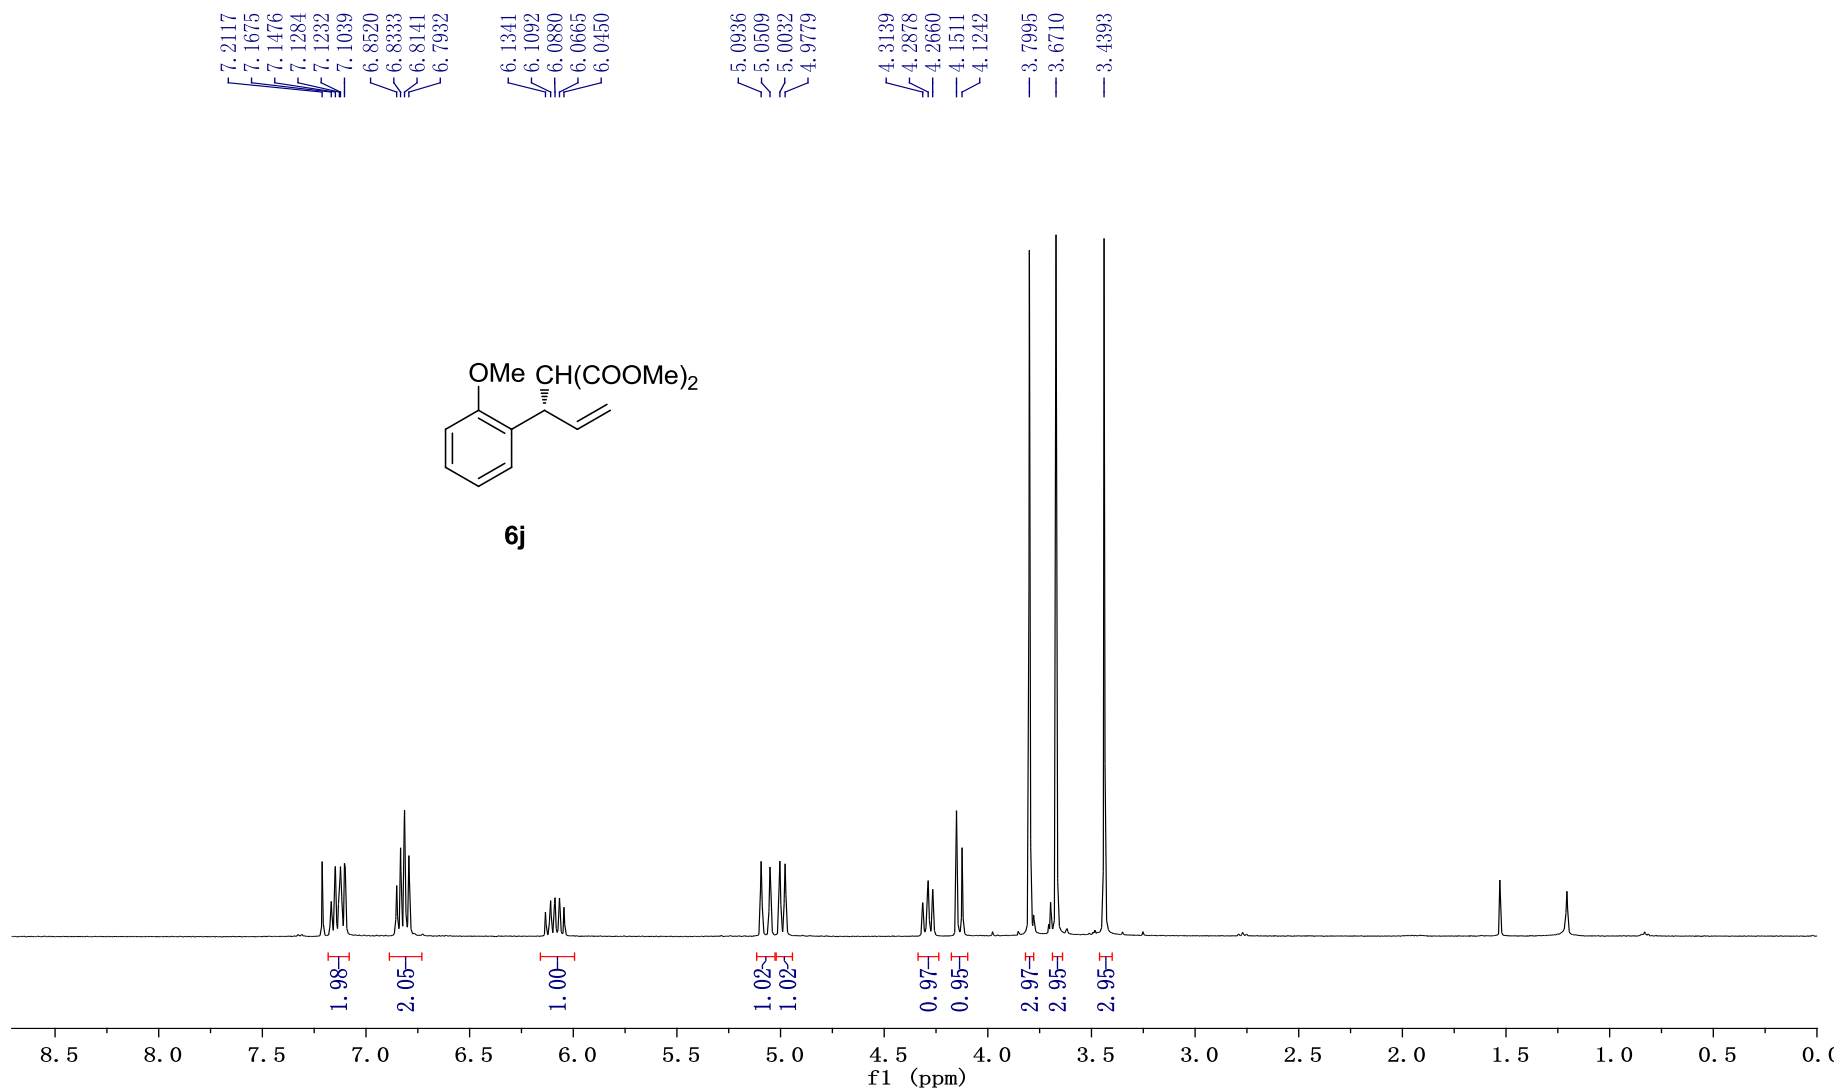

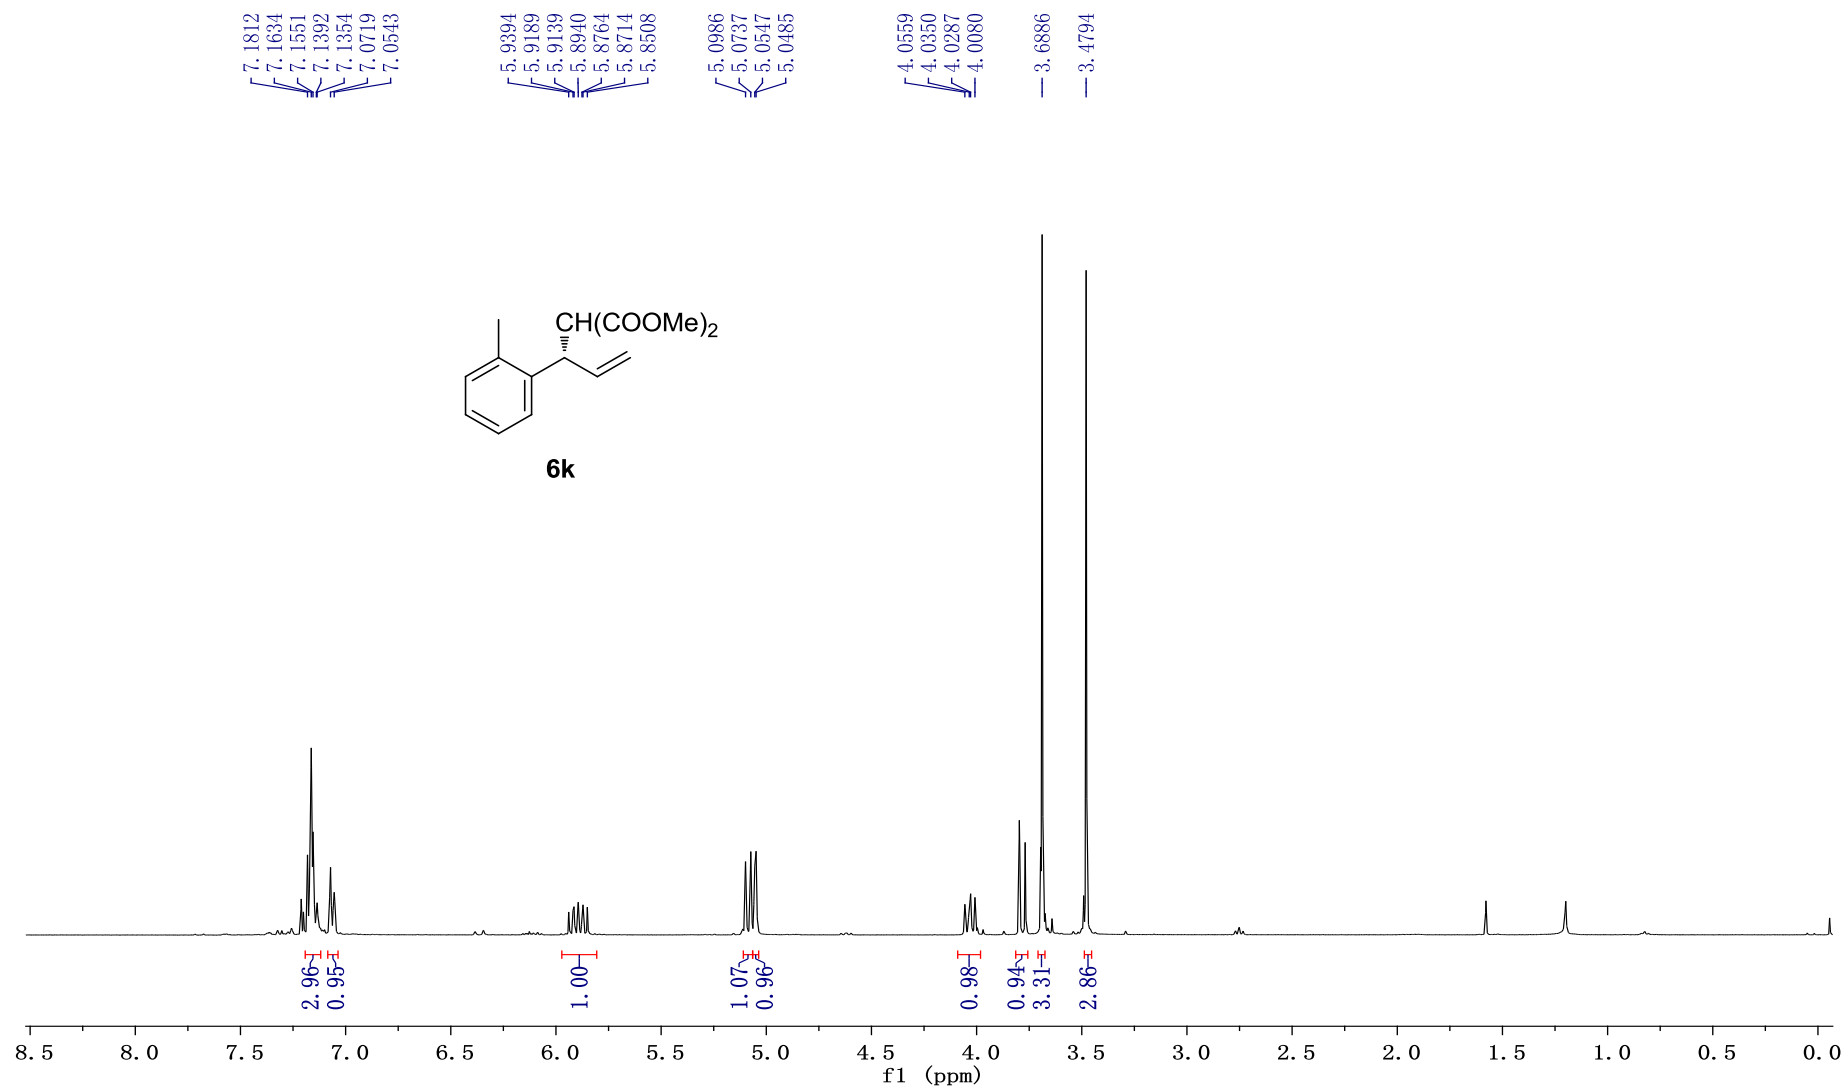

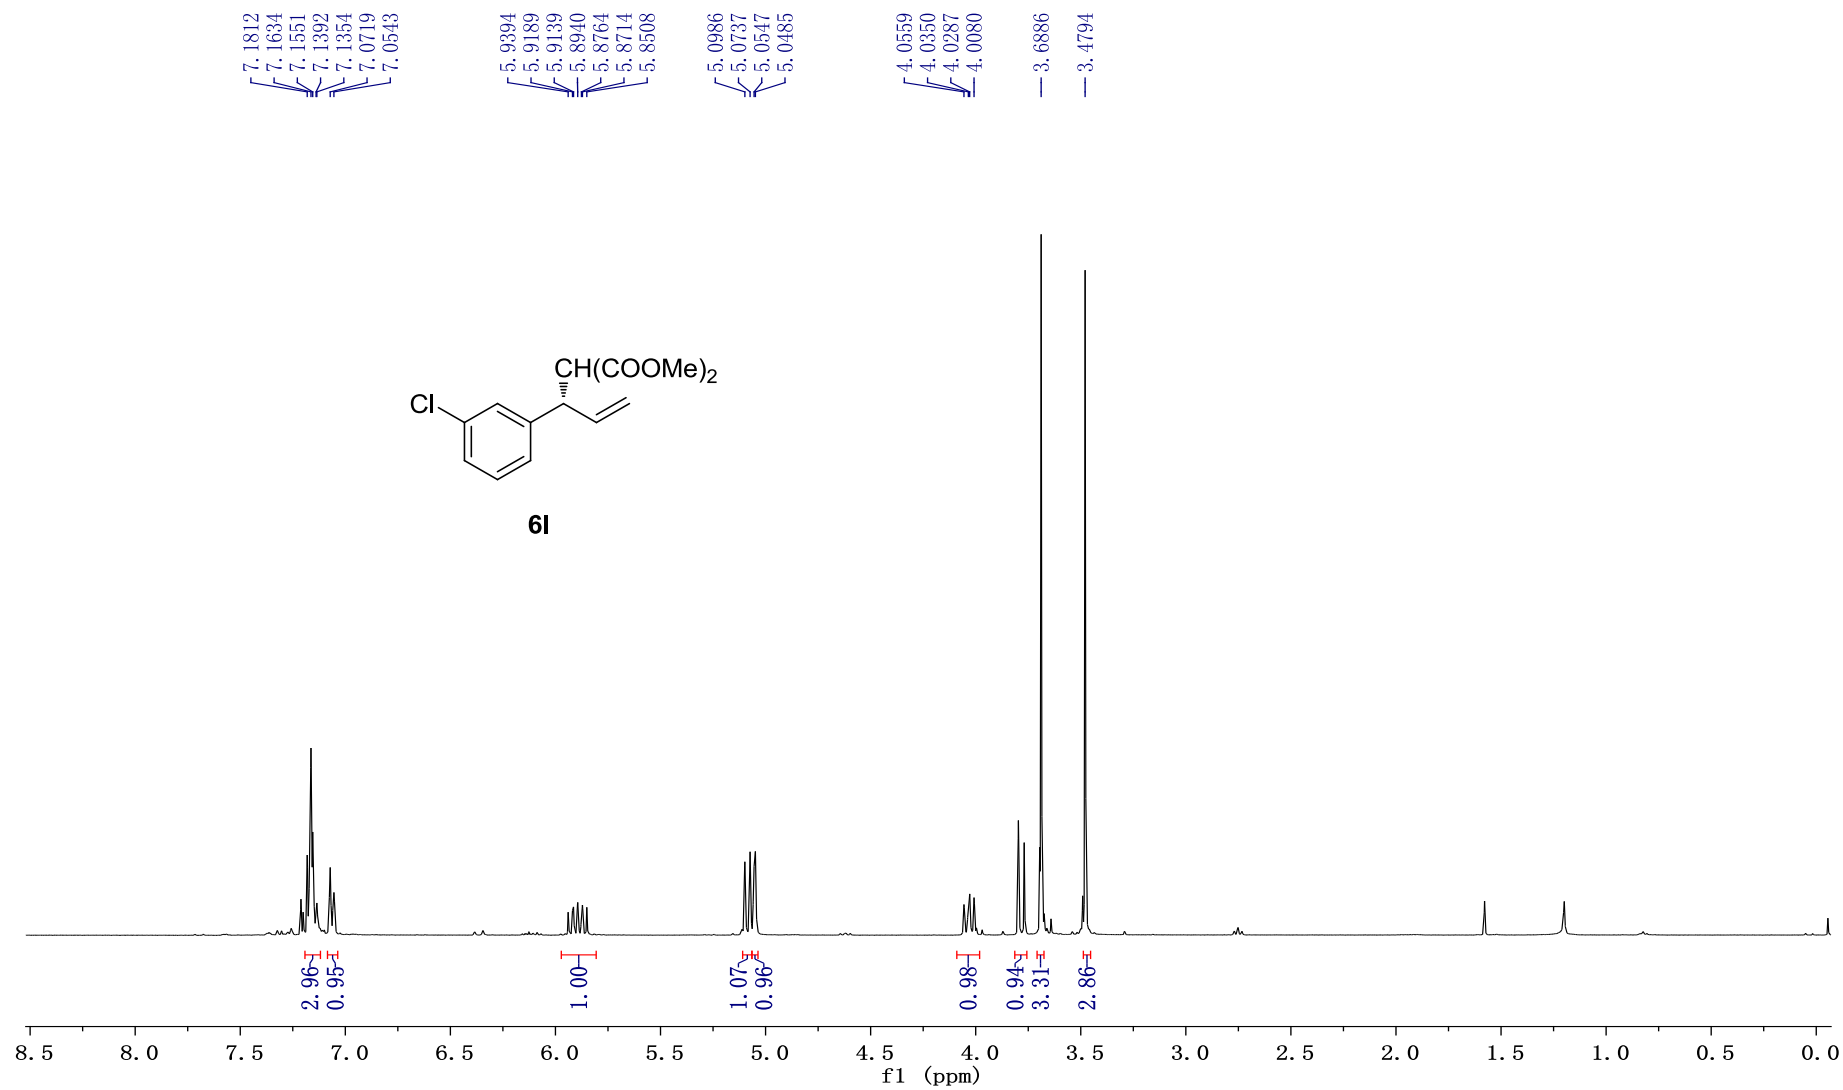

5.7153  
5.6952  
5.6897  
5.6721  
5.6701  
5.6524  
5.6469  
5.6268  
5.0168  
4.9741  
4.9325  
4.9068

3.6419  
3.6354  
3.6059  
3.2386  
3.2163  
2.8821  
2.8643  
2.8449  
2.8254

1.0097  
0.9928

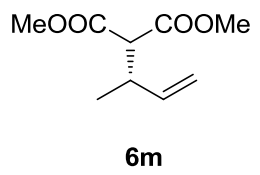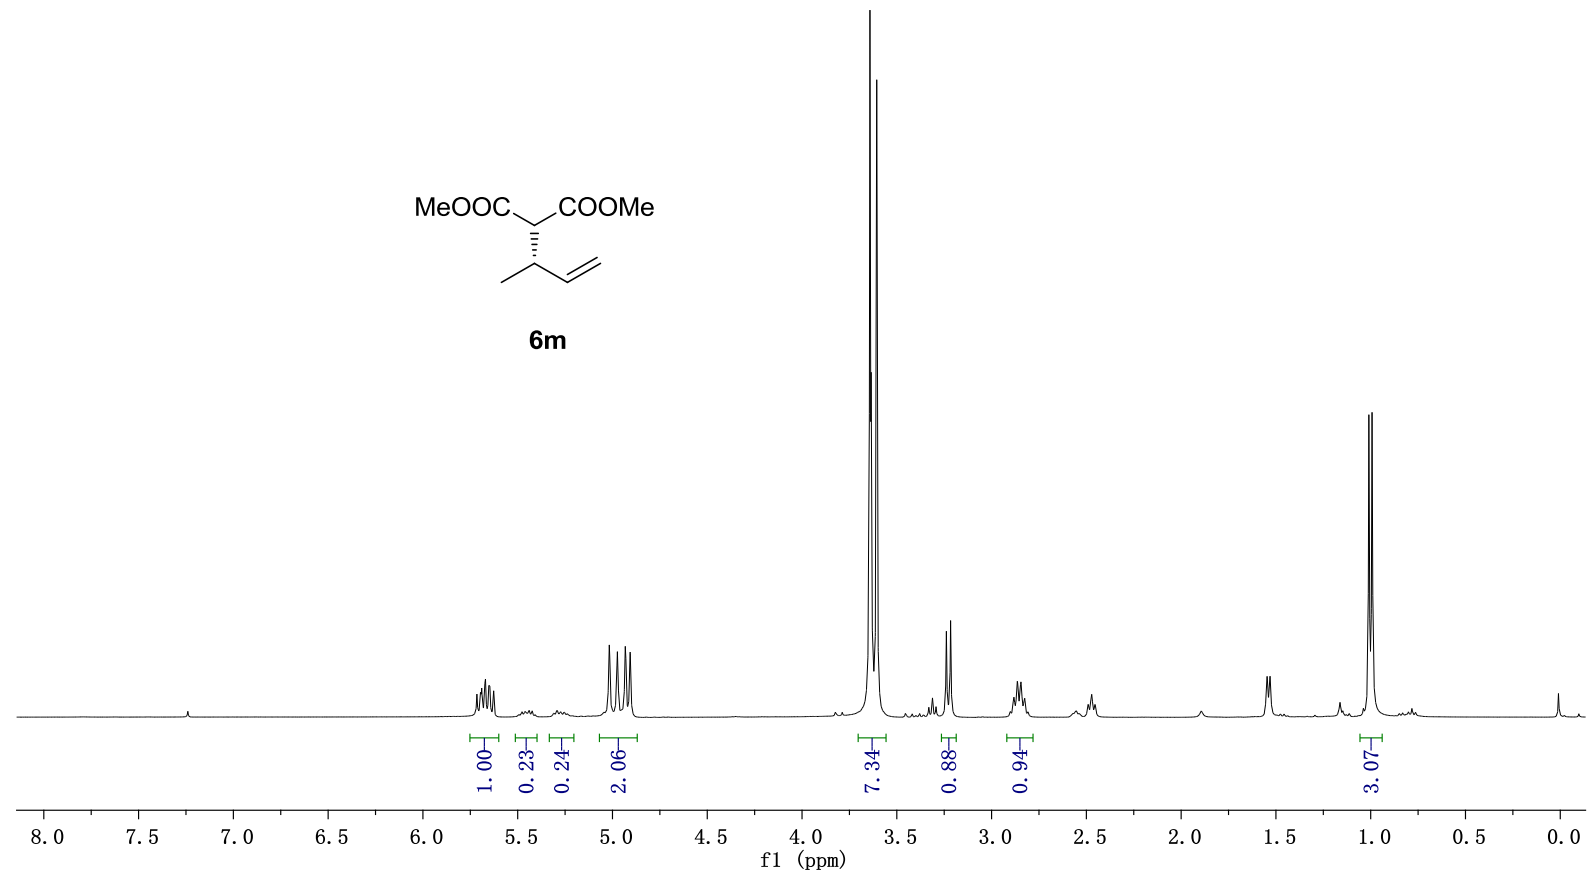

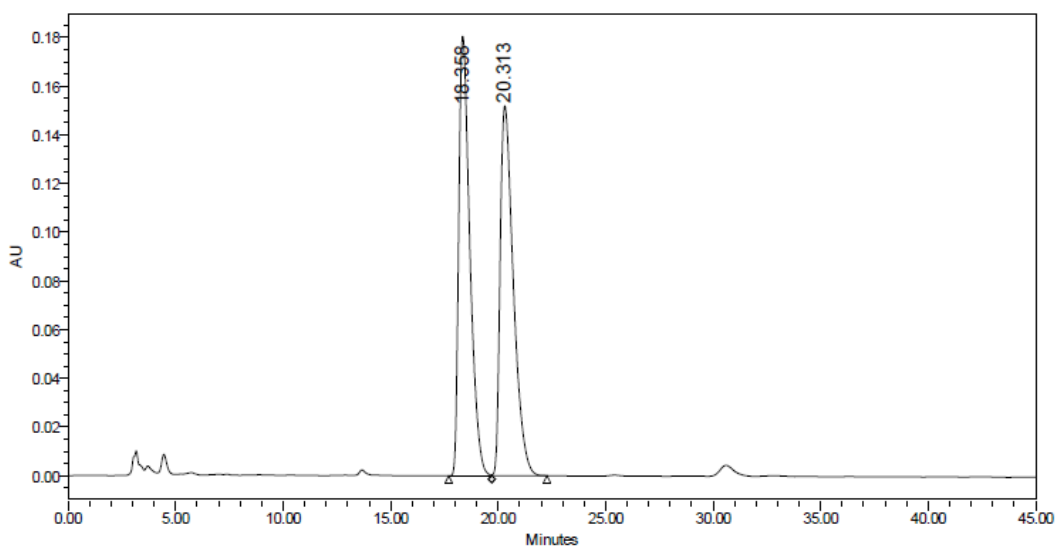

|   | RT (min) | Area ( $\mu\text{V}\cdot\text{sec}$ ) | % Area | Height ( $\mu\text{V}$ ) | % Height |
|---|----------|---------------------------------------|--------|--------------------------|----------|
| 1 | 18.358   | 6475692                               | 49.97  | 180624                   | 54.31    |
| 2 | 20.313   | 6484325                               | 50.03  | 151930                   | 45.69    |

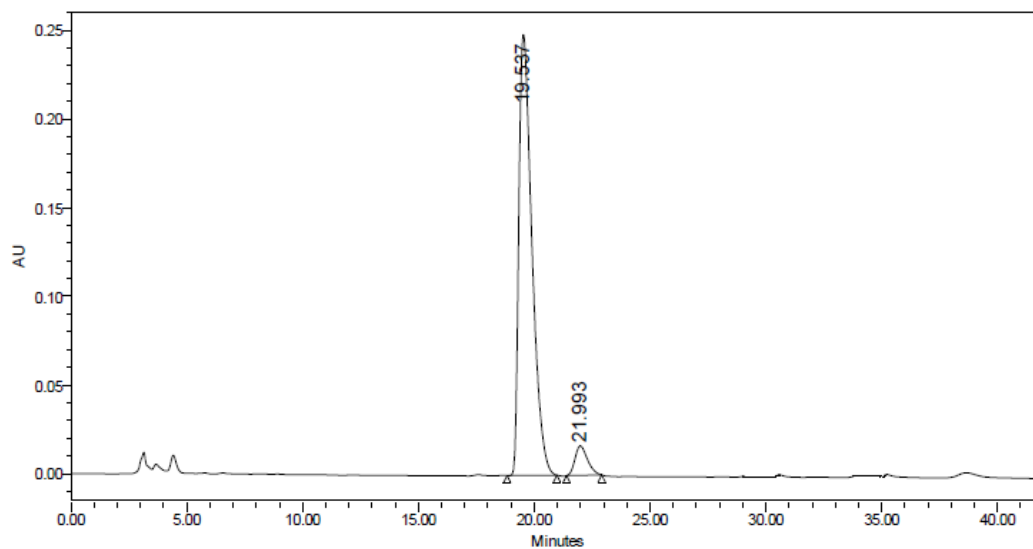

|   | RT (min) | Area ( $\mu\text{V}\cdot\text{sec}$ ) | % Area | Height ( $\mu\text{V}$ ) | % Height |
|---|----------|---------------------------------------|--------|--------------------------|----------|
| 1 | 19.537   | 9738931                               | 93.95  | 248498                   | 93.73    |
| 2 | 21.993   | 626862                                | 6.05   | 16626                    | 6.27     |

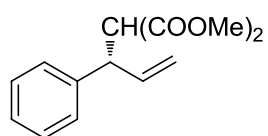

**6a**

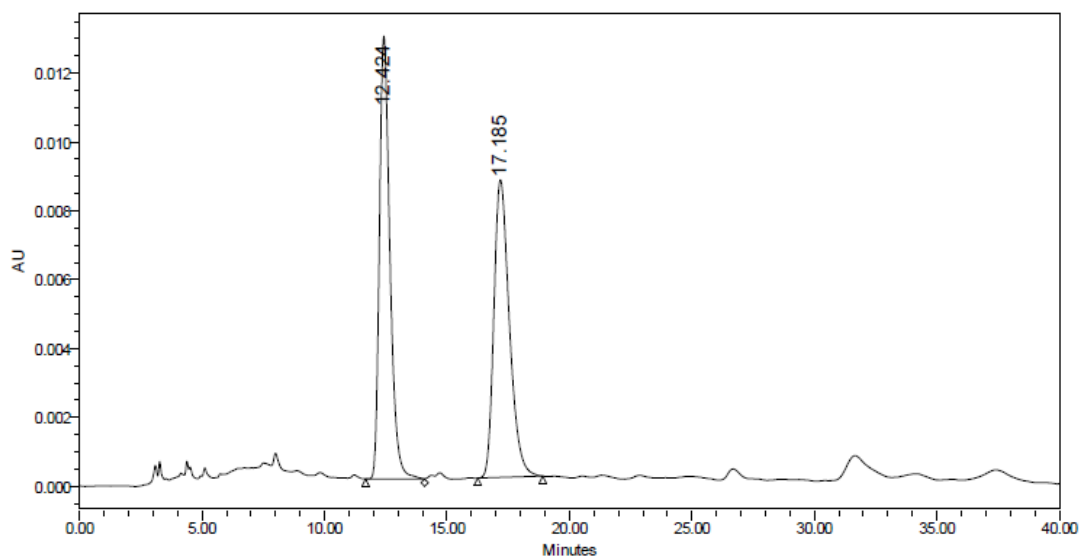

|   | RT (min) | Area ( $\mu\text{V}\cdot\text{sec}$ ) | % Area | Height ( $\mu\text{V}$ ) | % Height |
|---|----------|---------------------------------------|--------|--------------------------|----------|
| 1 | 12.424   | 383706                                | 50.28  | 12863                    | 59.81    |
| 2 | 17.185   | 379418                                | 49.72  | 8643                     | 40.19    |

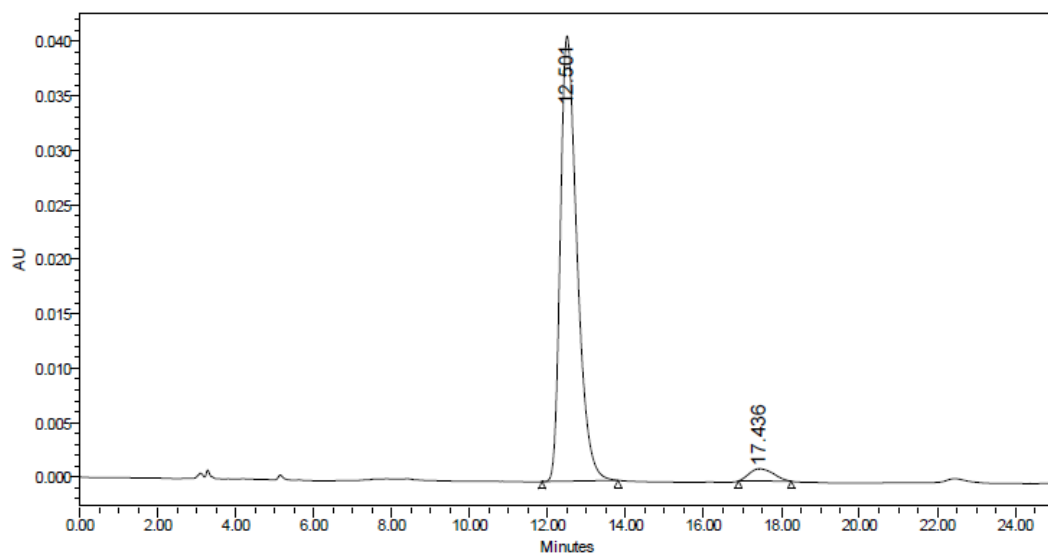

|   | RT (min) | Area ( $\mu\text{V}\cdot\text{sec}$ ) | % Area | Height ( $\mu\text{V}$ ) | % Height |
|---|----------|---------------------------------------|--------|--------------------------|----------|
| 1 | 12.501   | 1214733                               | 96.19  | 40874                    | 97.33    |
| 2 | 17.436   | 48088                                 | 3.81   | 1122                     | 2.67     |

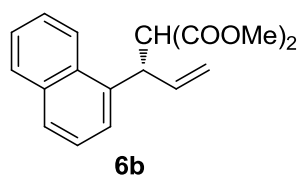



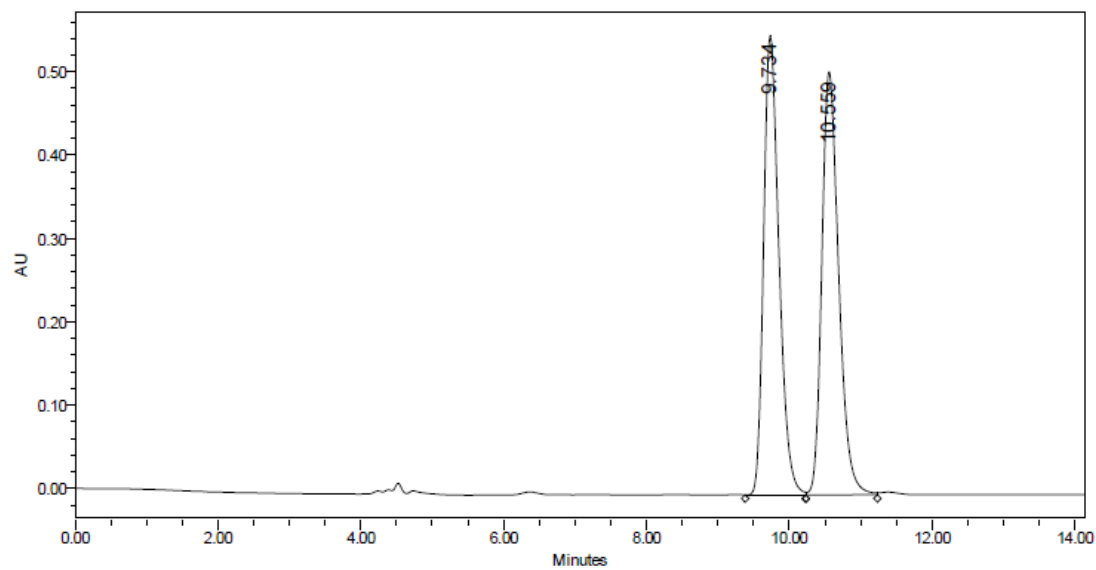

|   | RT (min) | Area ( $\mu\text{V}\cdot\text{sec}$ ) | % Area | Height ( $\mu\text{V}$ ) | % Height |
|---|----------|---------------------------------------|--------|--------------------------|----------|
| 1 | 9.734    | 8229584                               | 49.69  | 551394                   | 52.03    |
| 2 | 10.559   | 8332083                               | 50.31  | 508398                   | 47.97    |

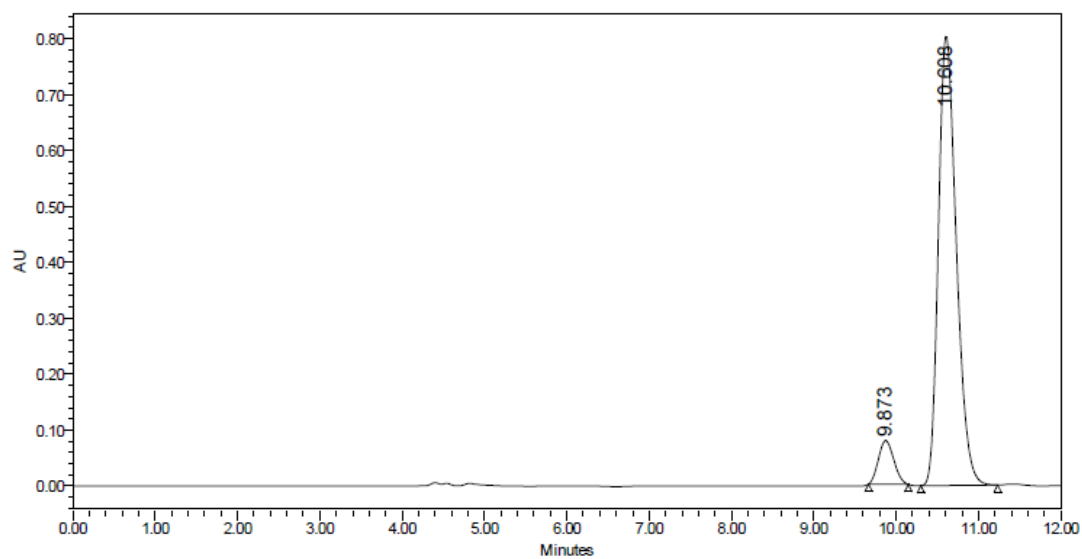

|   | RT (min) | Area ( $\mu\text{V}\cdot\text{sec}$ ) | % Area | Height ( $\mu\text{V}$ ) | % Height |
|---|----------|---------------------------------------|--------|--------------------------|----------|
| 1 | 9.873    | 1011762                               | 7.69   | 78231                    | 8.85     |
| 2 | 10.608   | 12149787                              | 92.31  | 805708                   | 91.15    |

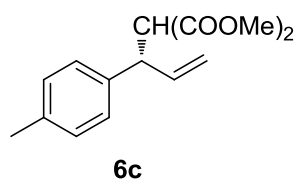

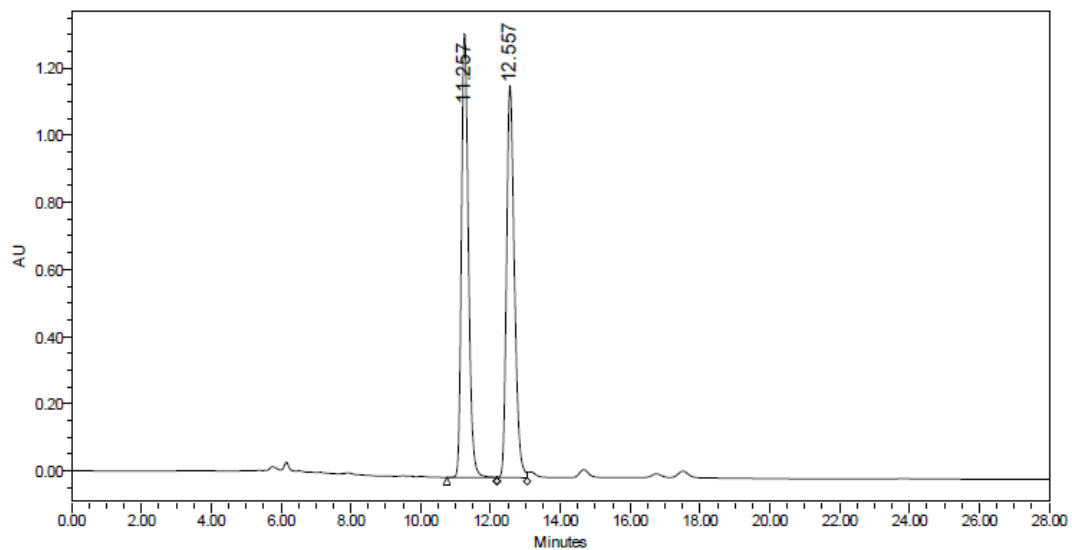

|   | RT (min) | Area ( $\mu\text{V}\cdot\text{sec}$ ) | % Area | Height ( $\mu\text{V}$ ) | % Height |
|---|----------|---------------------------------------|--------|--------------------------|----------|
| 1 | 11.257   | 18267646                              | 49.97  | 1325334                  | 53.11    |
| 2 | 12.557   | 18289924                              | 50.03  | 1170079                  | 46.89    |

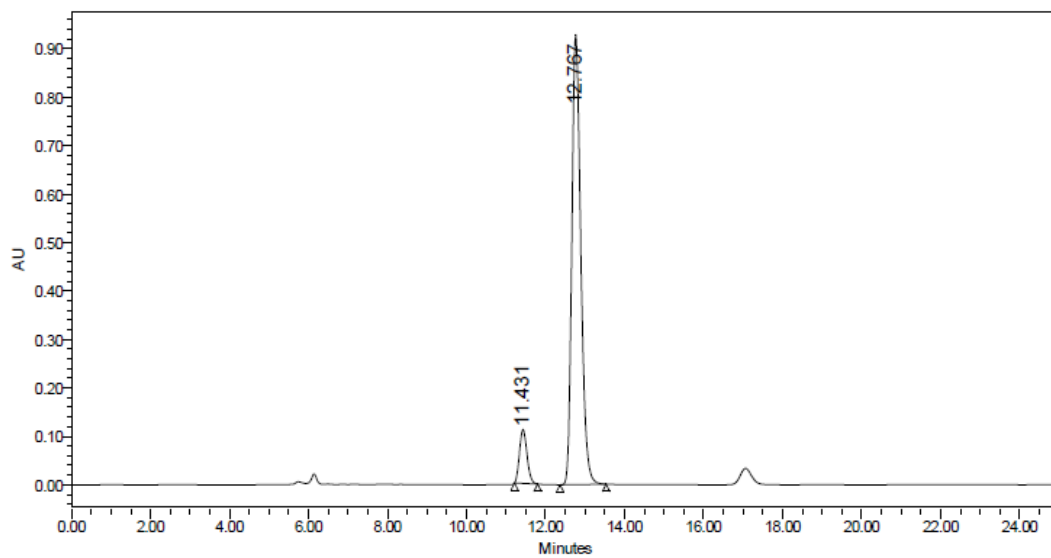

|   | RT (min) | Area ( $\mu\text{V}\cdot\text{sec}$ ) | % Area | Height ( $\mu\text{V}$ ) | % Height |
|---|----------|---------------------------------------|--------|--------------------------|----------|
| 1 | 11.431   | 1458444                               | 9.09   | 111225                   | 10.70    |
| 2 | 12.767   | 14594653                              | 90.91  | 928123                   | 89.30    |

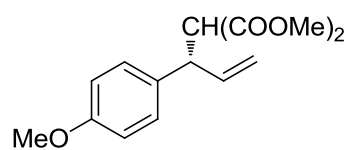

**6d**

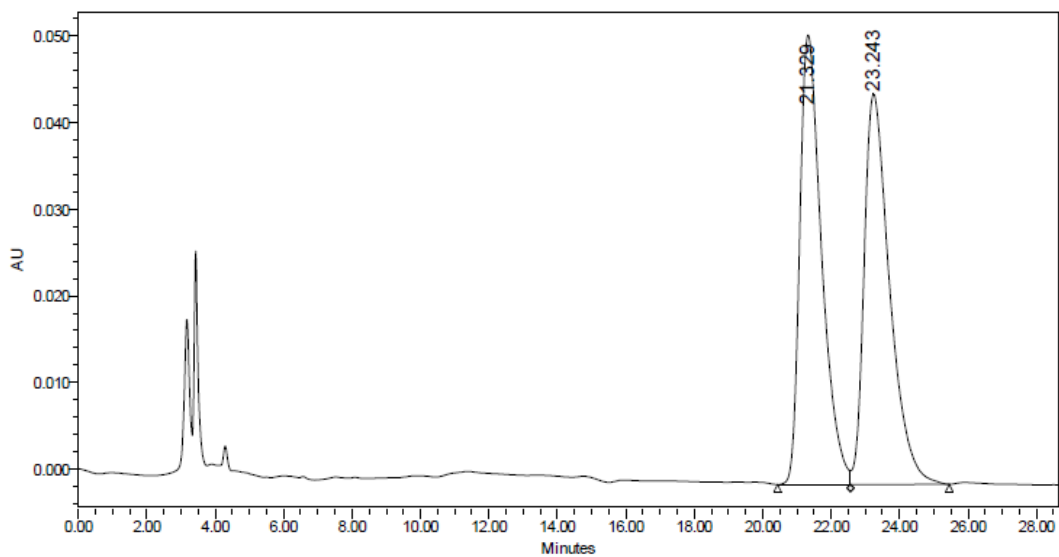

|   | RT (min) | Area ( $\mu\text{V}\cdot\text{sec}$ ) | % Area | Height ( $\mu\text{V}$ ) | % Height |
|---|----------|---------------------------------------|--------|--------------------------|----------|
| 1 | 21.329   | 2303008                               | 49.65  | 51878                    | 53.52    |
| 2 | 23.243   | 2335145                               | 50.35  | 45051                    | 46.48    |

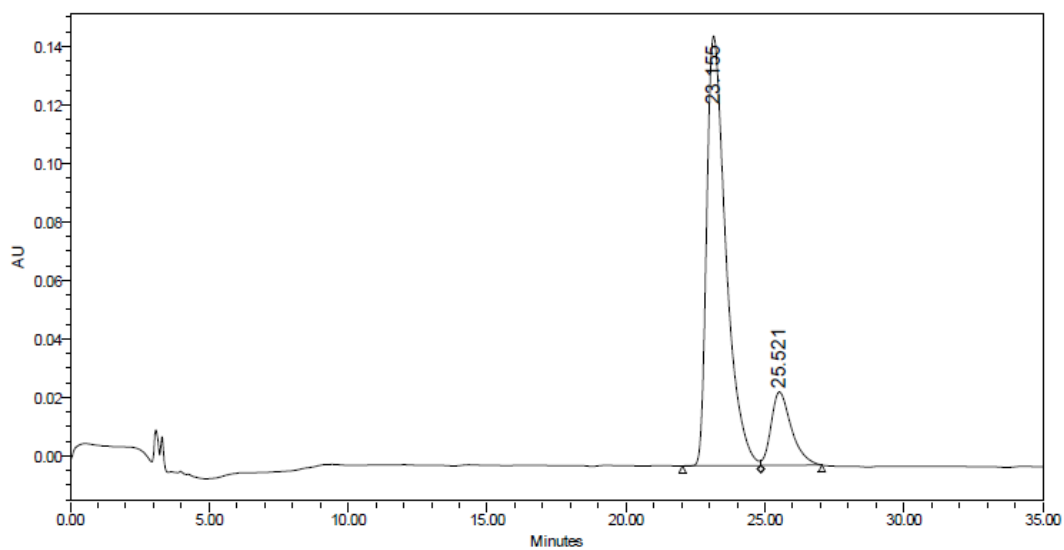

|   | RT (min) | Area ( $\mu\text{V}\cdot\text{sec}$ ) | % Area | Height ( $\mu\text{V}$ ) | % Height |
|---|----------|---------------------------------------|--------|--------------------------|----------|
| 1 | 23.155   | 7066554                               | 84.74  | 146840                   | 85.43    |
| 2 | 25.521   | 1272434                               | 15.26  | 25040                    | 14.57    |

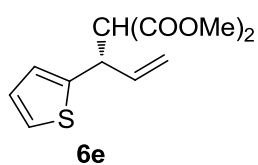

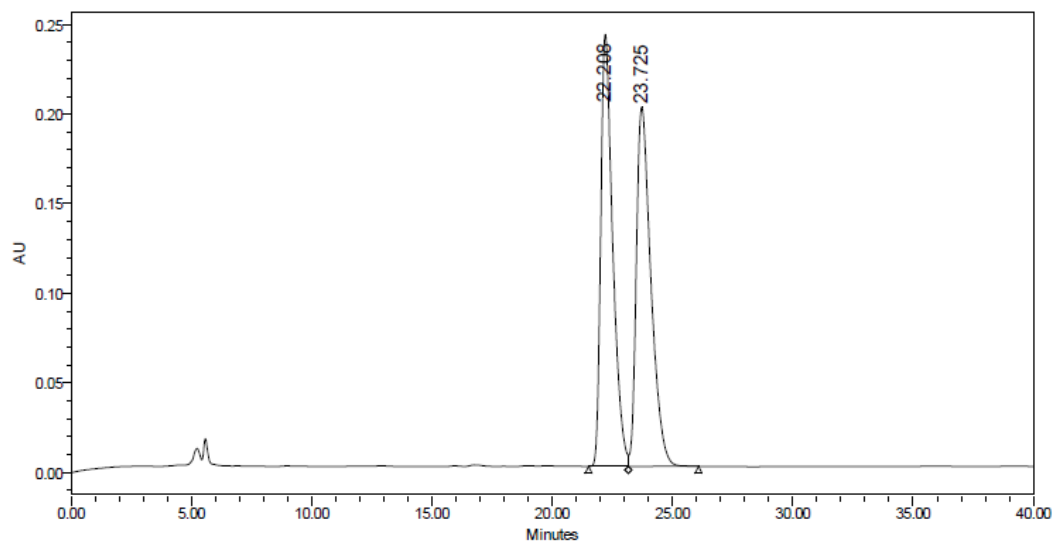

|   | RT (min) | Area ( $\mu\text{V}\cdot\text{sec}$ ) | % Area | Height ( $\mu\text{V}$ ) | % Height |
|---|----------|---------------------------------------|--------|--------------------------|----------|
| 1 | 22.208   | 8300809                               | 49.58  | 241382                   | 54.61    |
| 2 | 23.725   | 8440896                               | 50.42  | 200658                   | 45.39    |

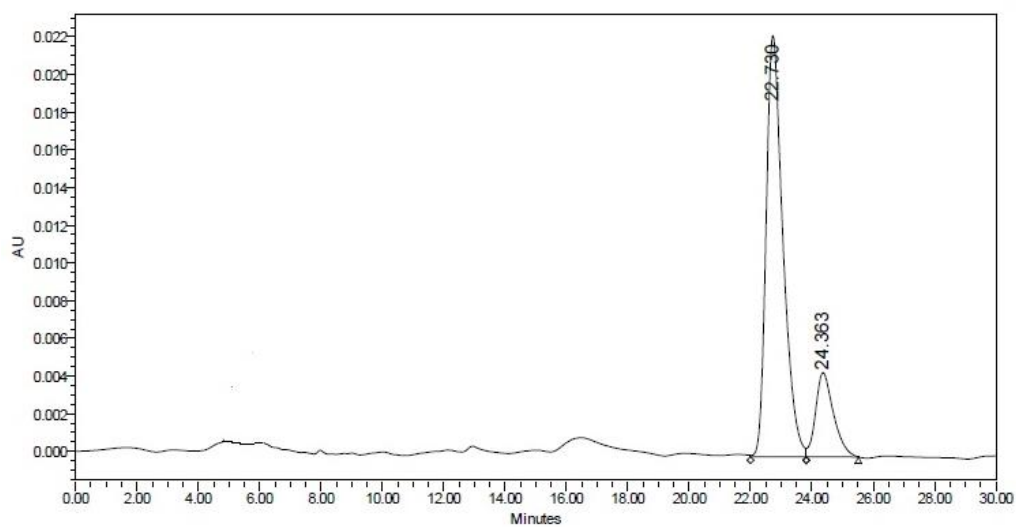

|   | RT (min) | Area ( $\mu\text{V}\cdot\text{sec}$ ) | % Area | Height ( $\mu\text{V}$ ) | % Height |
|---|----------|---------------------------------------|--------|--------------------------|----------|
| 1 | 22.730   | 850027                                | 82.46  | 22345                    | 83.32    |
| 2 | 24.363   | 180865                                | 17.54  | 4475                     | 16.68    |

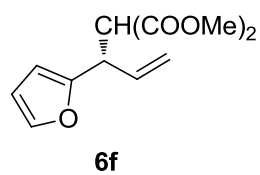

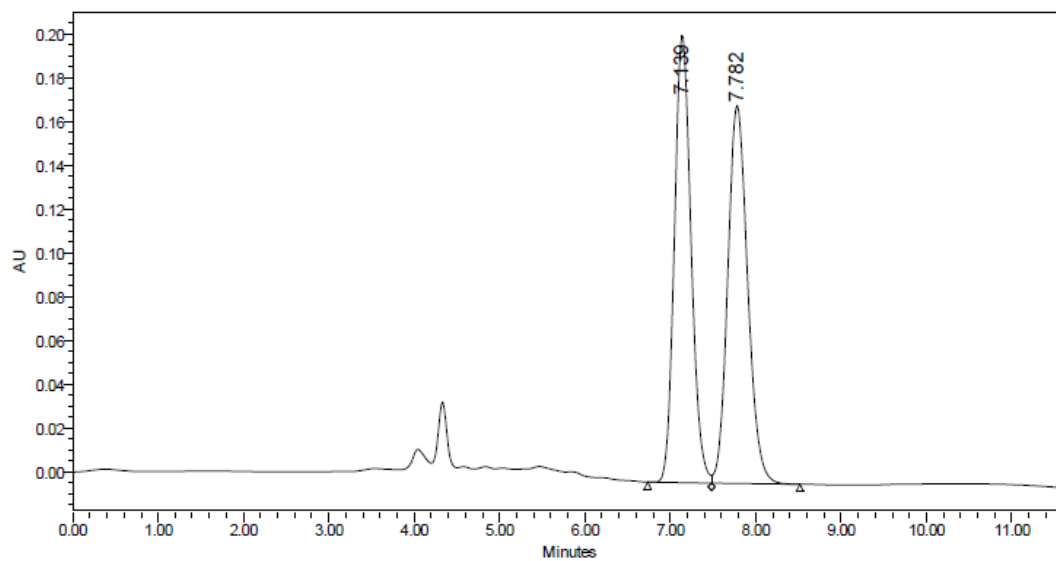

|   | RT (min) | Area ( $\mu\text{V}\cdot\text{sec}$ ) | % Area | Height ( $\mu\text{V}$ ) | % Height |
|---|----------|---------------------------------------|--------|--------------------------|----------|
| 1 | 7.139    | 2771130                               | 49.80  | 204622                   | 54.26    |
| 2 | 7.782    | 2793338                               | 50.20  | 172519                   | 45.74    |

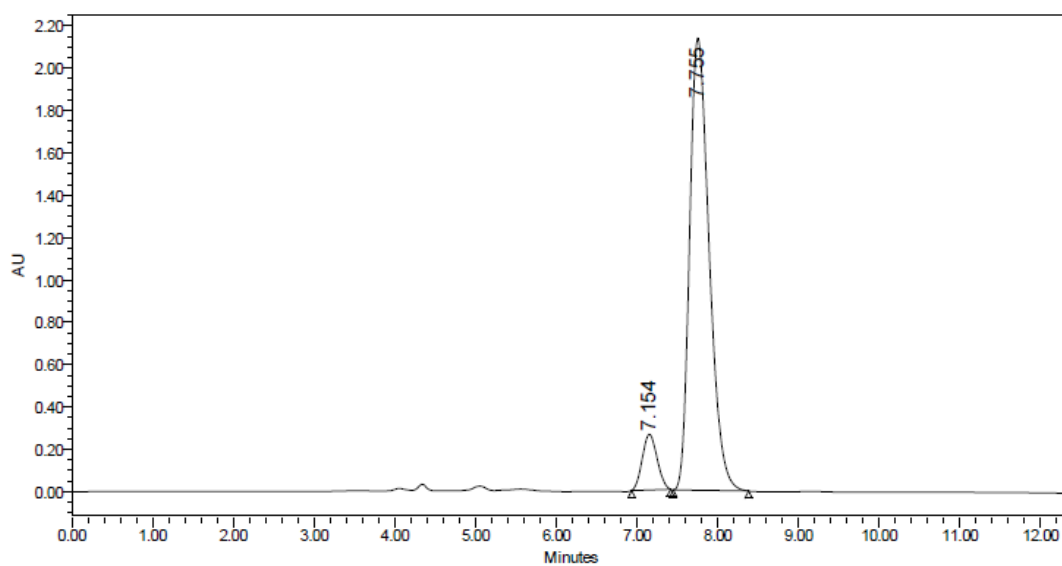

|   | RT (min) | Area ( $\mu\text{V}\cdot\text{sec}$ ) | % Area | Height ( $\mu\text{V}$ ) | % Height |
|---|----------|---------------------------------------|--------|--------------------------|----------|
| 1 | 7.154    | 3352445                               | 8.55   | 262725                   | 10.95    |
| 2 | 7.755    | 35862552                              | 91.45  | 2137653                  | 89.05    |

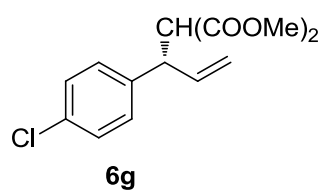

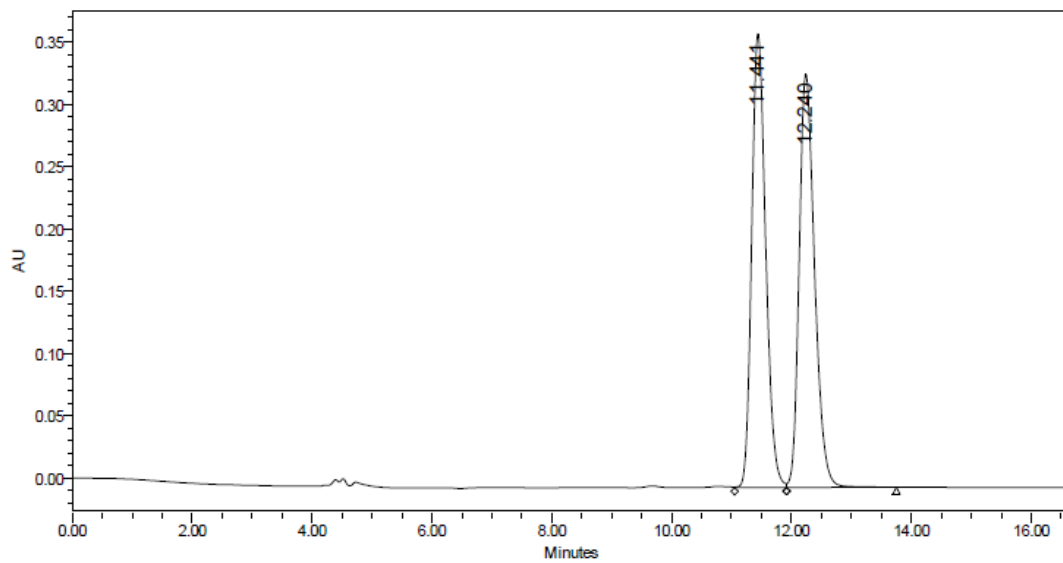

|   | RT (min) | Area ( $\mu\text{V}\cdot\text{sec}$ ) | % Area | Height ( $\mu\text{V}$ ) | % Height |
|---|----------|---------------------------------------|--------|--------------------------|----------|
| 1 | 11.441   | 5891499                               | 49.87  | 365237                   | 52.35    |
| 2 | 12.240   | 5922239                               | 50.13  | 332407                   | 47.65    |

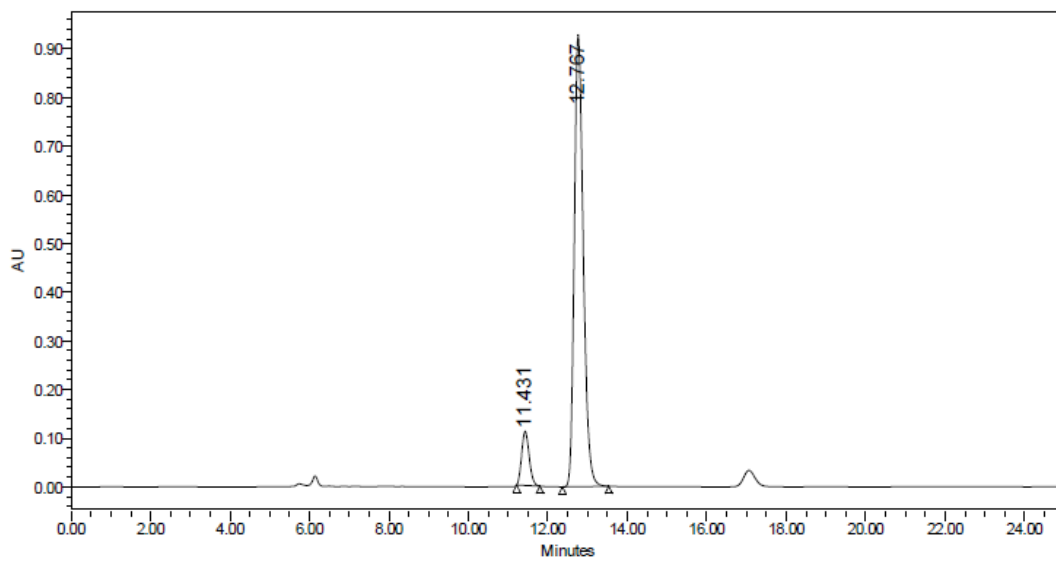

|   | RT (min) | Area ( $\mu\text{V}\cdot\text{sec}$ ) | % Area | Height ( $\mu\text{V}$ ) | % Height |
|---|----------|---------------------------------------|--------|--------------------------|----------|
| 1 | 11.431   | 1458444                               | 9.09   | 111225                   | 10.70    |
| 2 | 12.767   | 14594653                              | 90.91  | 928123                   | 89.30    |

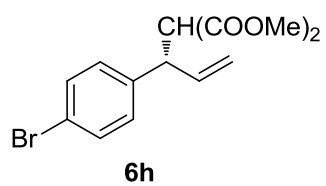

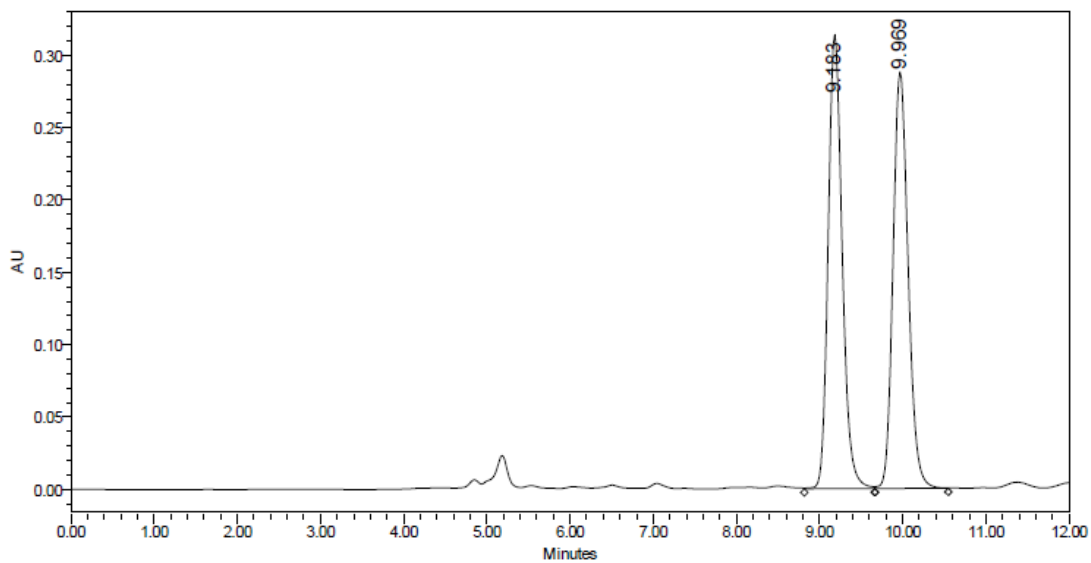

|   | RT (min) | Area ( $\mu\text{V}\cdot\text{sec}$ ) | % Area | Height ( $\mu\text{V}$ ) | % Height |
|---|----------|---------------------------------------|--------|--------------------------|----------|
| 1 | 9.183    | 3684189                               | 50.29  | 313703                   | 52.14    |
| 2 | 9.969    | 3641751                               | 49.71  | 287951                   | 47.86    |

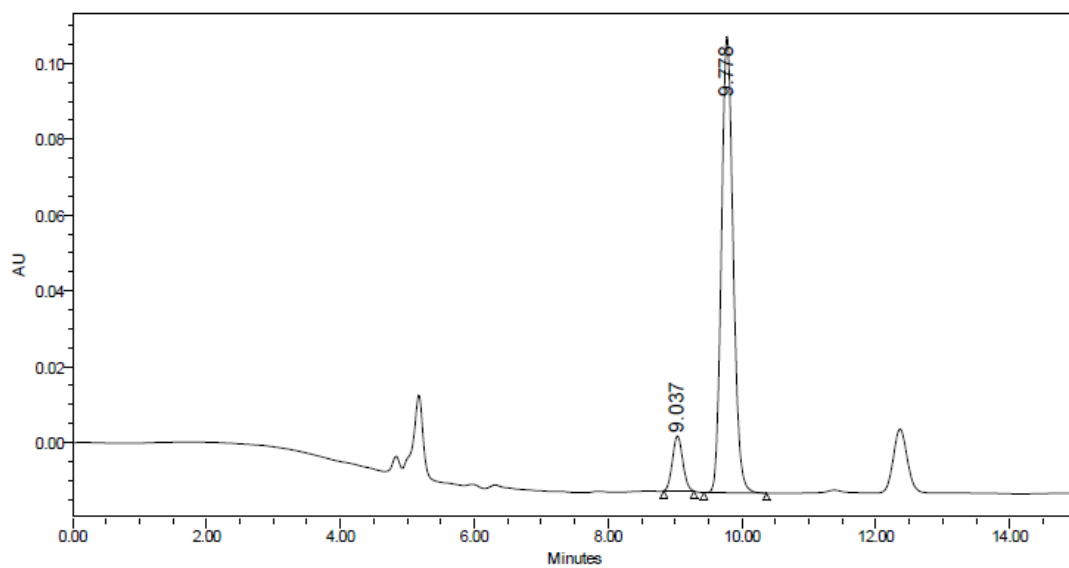

|   | RT (min) | Area ( $\mu\text{V}\cdot\text{sec}$ ) | % Area | Height ( $\mu\text{V}$ ) | % Height |
|---|----------|---------------------------------------|--------|--------------------------|----------|
| 1 | 9.037    | 155756                                | 9.62   | 14561                    | 10.78    |
| 2 | 9.778    | 1464036                               | 90.38  | 120464                   | 89.22    |

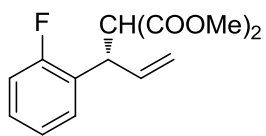

**6i**

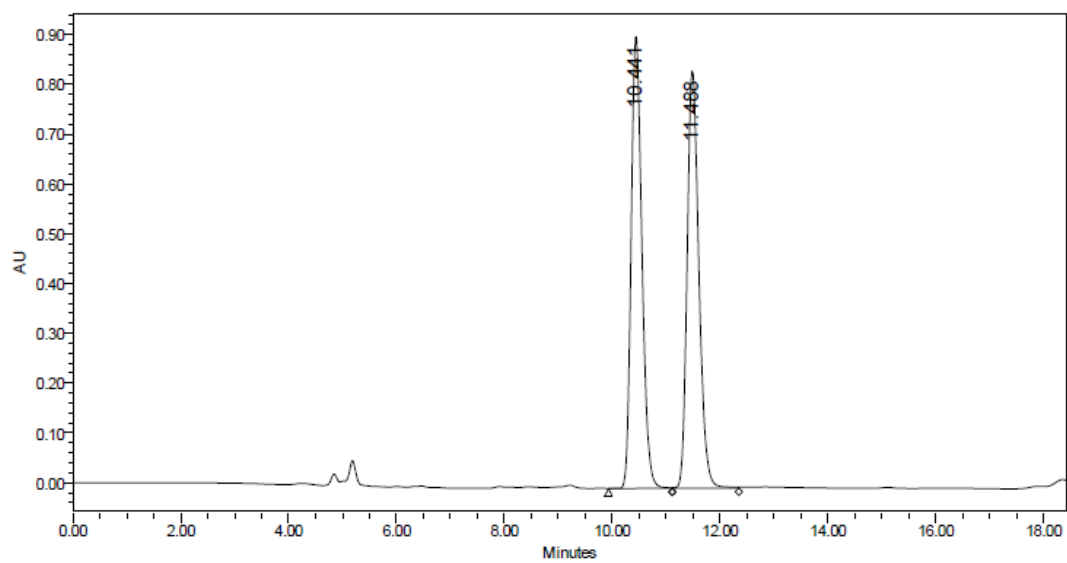

|   | RT (min) | Area ( $\mu\text{V}\cdot\text{sec}$ ) | % Area | Height ( $\mu\text{V}$ ) | % Height |
|---|----------|---------------------------------------|--------|--------------------------|----------|
| 1 | 10.441   | 12564478                              | 49.88  | 910416                   | 52.05    |
| 2 | 11.488   | 12626680                              | 50.12  | 838856                   | 47.95    |

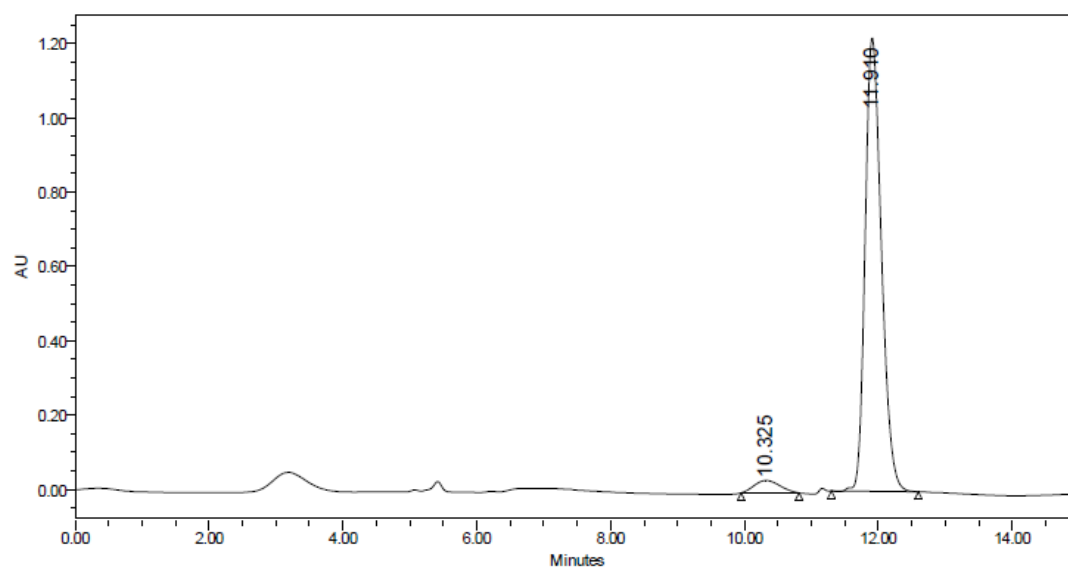

|   | RT (min) | Area ( $\mu\text{V}\cdot\text{sec}$ ) | % Area | Height ( $\mu\text{V}$ ) | % Height |
|---|----------|---------------------------------------|--------|--------------------------|----------|
| 1 | 10.325   | 885124                                | 4.11   | 33392                    | 2.66     |
| 2 | 11.910   | 20653228                              | 95.89  | 1221772                  | 97.34    |

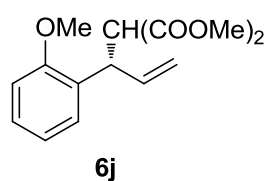



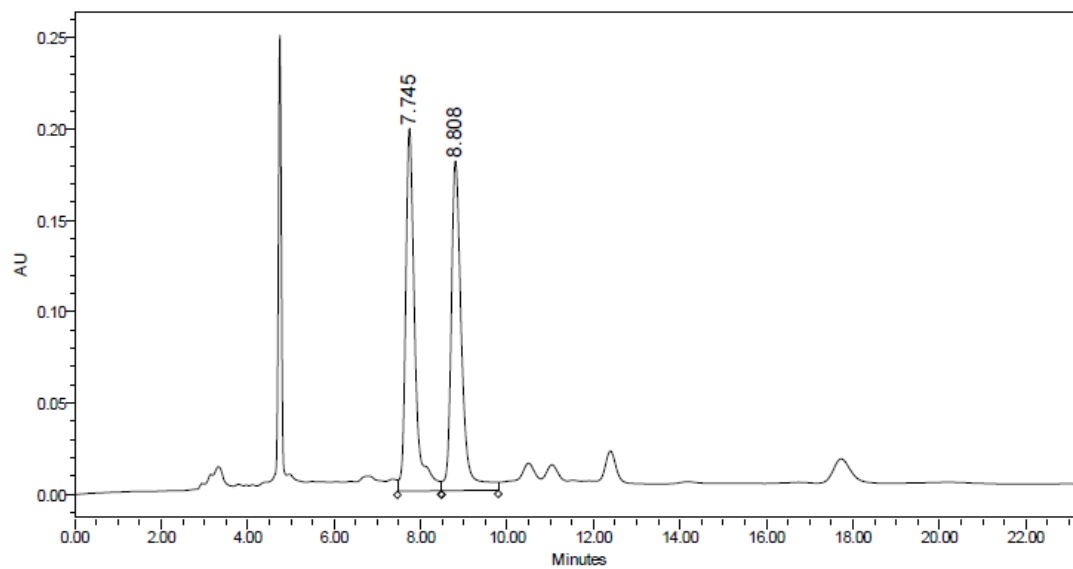

|   | RT (min) | Area ( $\mu\text{V}\cdot\text{sec}$ ) | % Area | Height ( $\mu\text{V}$ ) | % Height |
|---|----------|---------------------------------------|--------|--------------------------|----------|
| 1 | 7.745    | 2930126                               | 49.37  | 198886                   | 52.36    |
| 2 | 8.808    | 3004958                               | 50.63  | 180981                   | 47.64    |

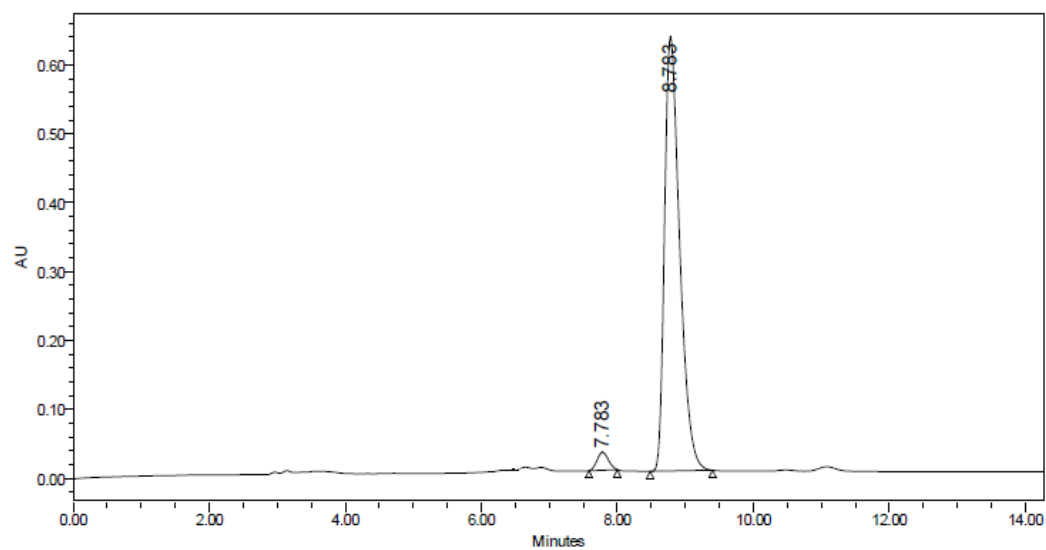

|   | RT (min) | Area ( $\mu\text{V}\cdot\text{sec}$ ) | % Area | Height ( $\mu\text{V}$ ) | % Height |
|---|----------|---------------------------------------|--------|--------------------------|----------|
| 1 | 7.783    | 301969                                | 3.02   | 25945                    | 3.95     |
| 2 | 8.783    | 9712770                               | 96.98  | 630885                   | 96.05    |

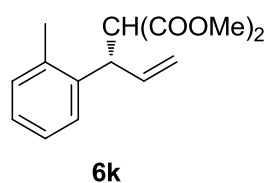

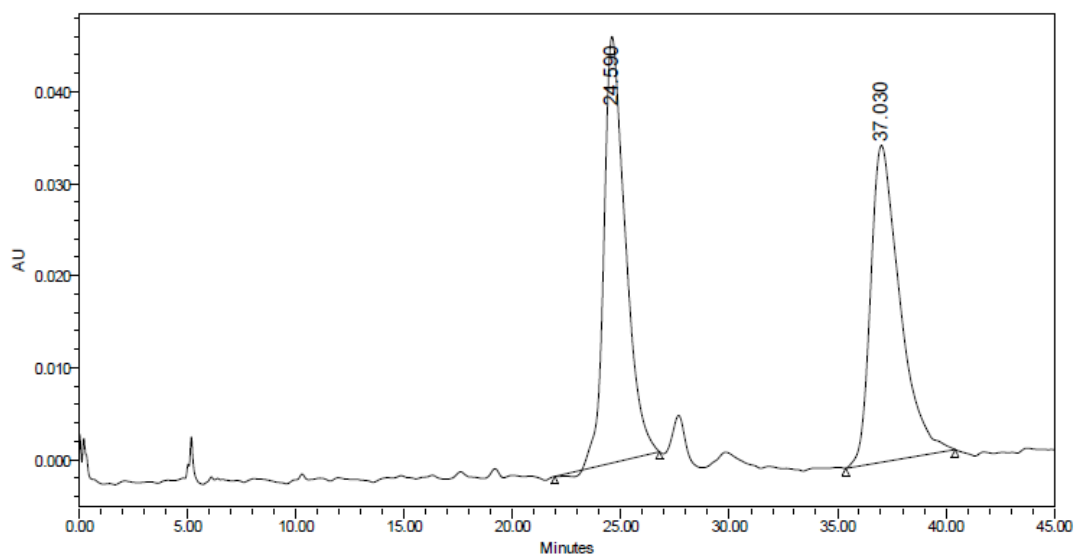

|   | RT (min) | Area ( $\mu\text{V}\cdot\text{sec}$ ) | % Area | Height ( $\mu\text{V}$ ) | % Height |
|---|----------|---------------------------------------|--------|--------------------------|----------|
| 1 | 24.590   | 3235742                               | 49.98  | 46381                    | 57.39    |
| 2 | 37.030   | 3237897                               | 50.02  | 34439                    | 42.61    |

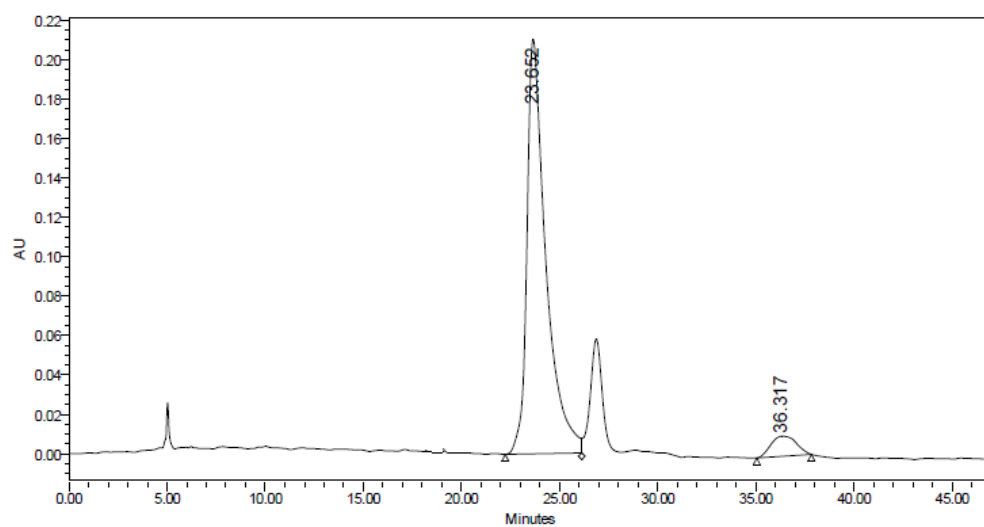

|   | RT (min) | Area ( $\mu\text{V}\cdot\text{sec}$ ) | % Area | Height ( $\mu\text{V}$ ) | % Height |
|---|----------|---------------------------------------|--------|--------------------------|----------|
| 1 | 23.652   | 14103651                              | 93.92  | 210550                   | 95.38    |
| 2 | 36.317   | 912731                                | 6.08   | 10191                    | 4.62     |

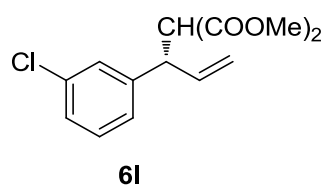

Supplement: Beilstein_J_Org_Chem-10-1261-s001.pdf [file Beilstein_J_Org_Chem-10-1261-s001.pdf]
